# Supplementary material for: High-Performance Liquid Chromatography–Mass Spectrometry Analysis of Glycoalkaloids from Underexploited Solanum Species and Their Acetylcholinesterase Inhibition Activity
Source: MDPI journal article supplement (doi:10.3390/plants11030269), 2022-01-20

Figure S2. Reported structures of glycoalkaloids referenced in the manuscript and identified in Table 1.

## Hydroxy-solamargine (**1**, **29**)

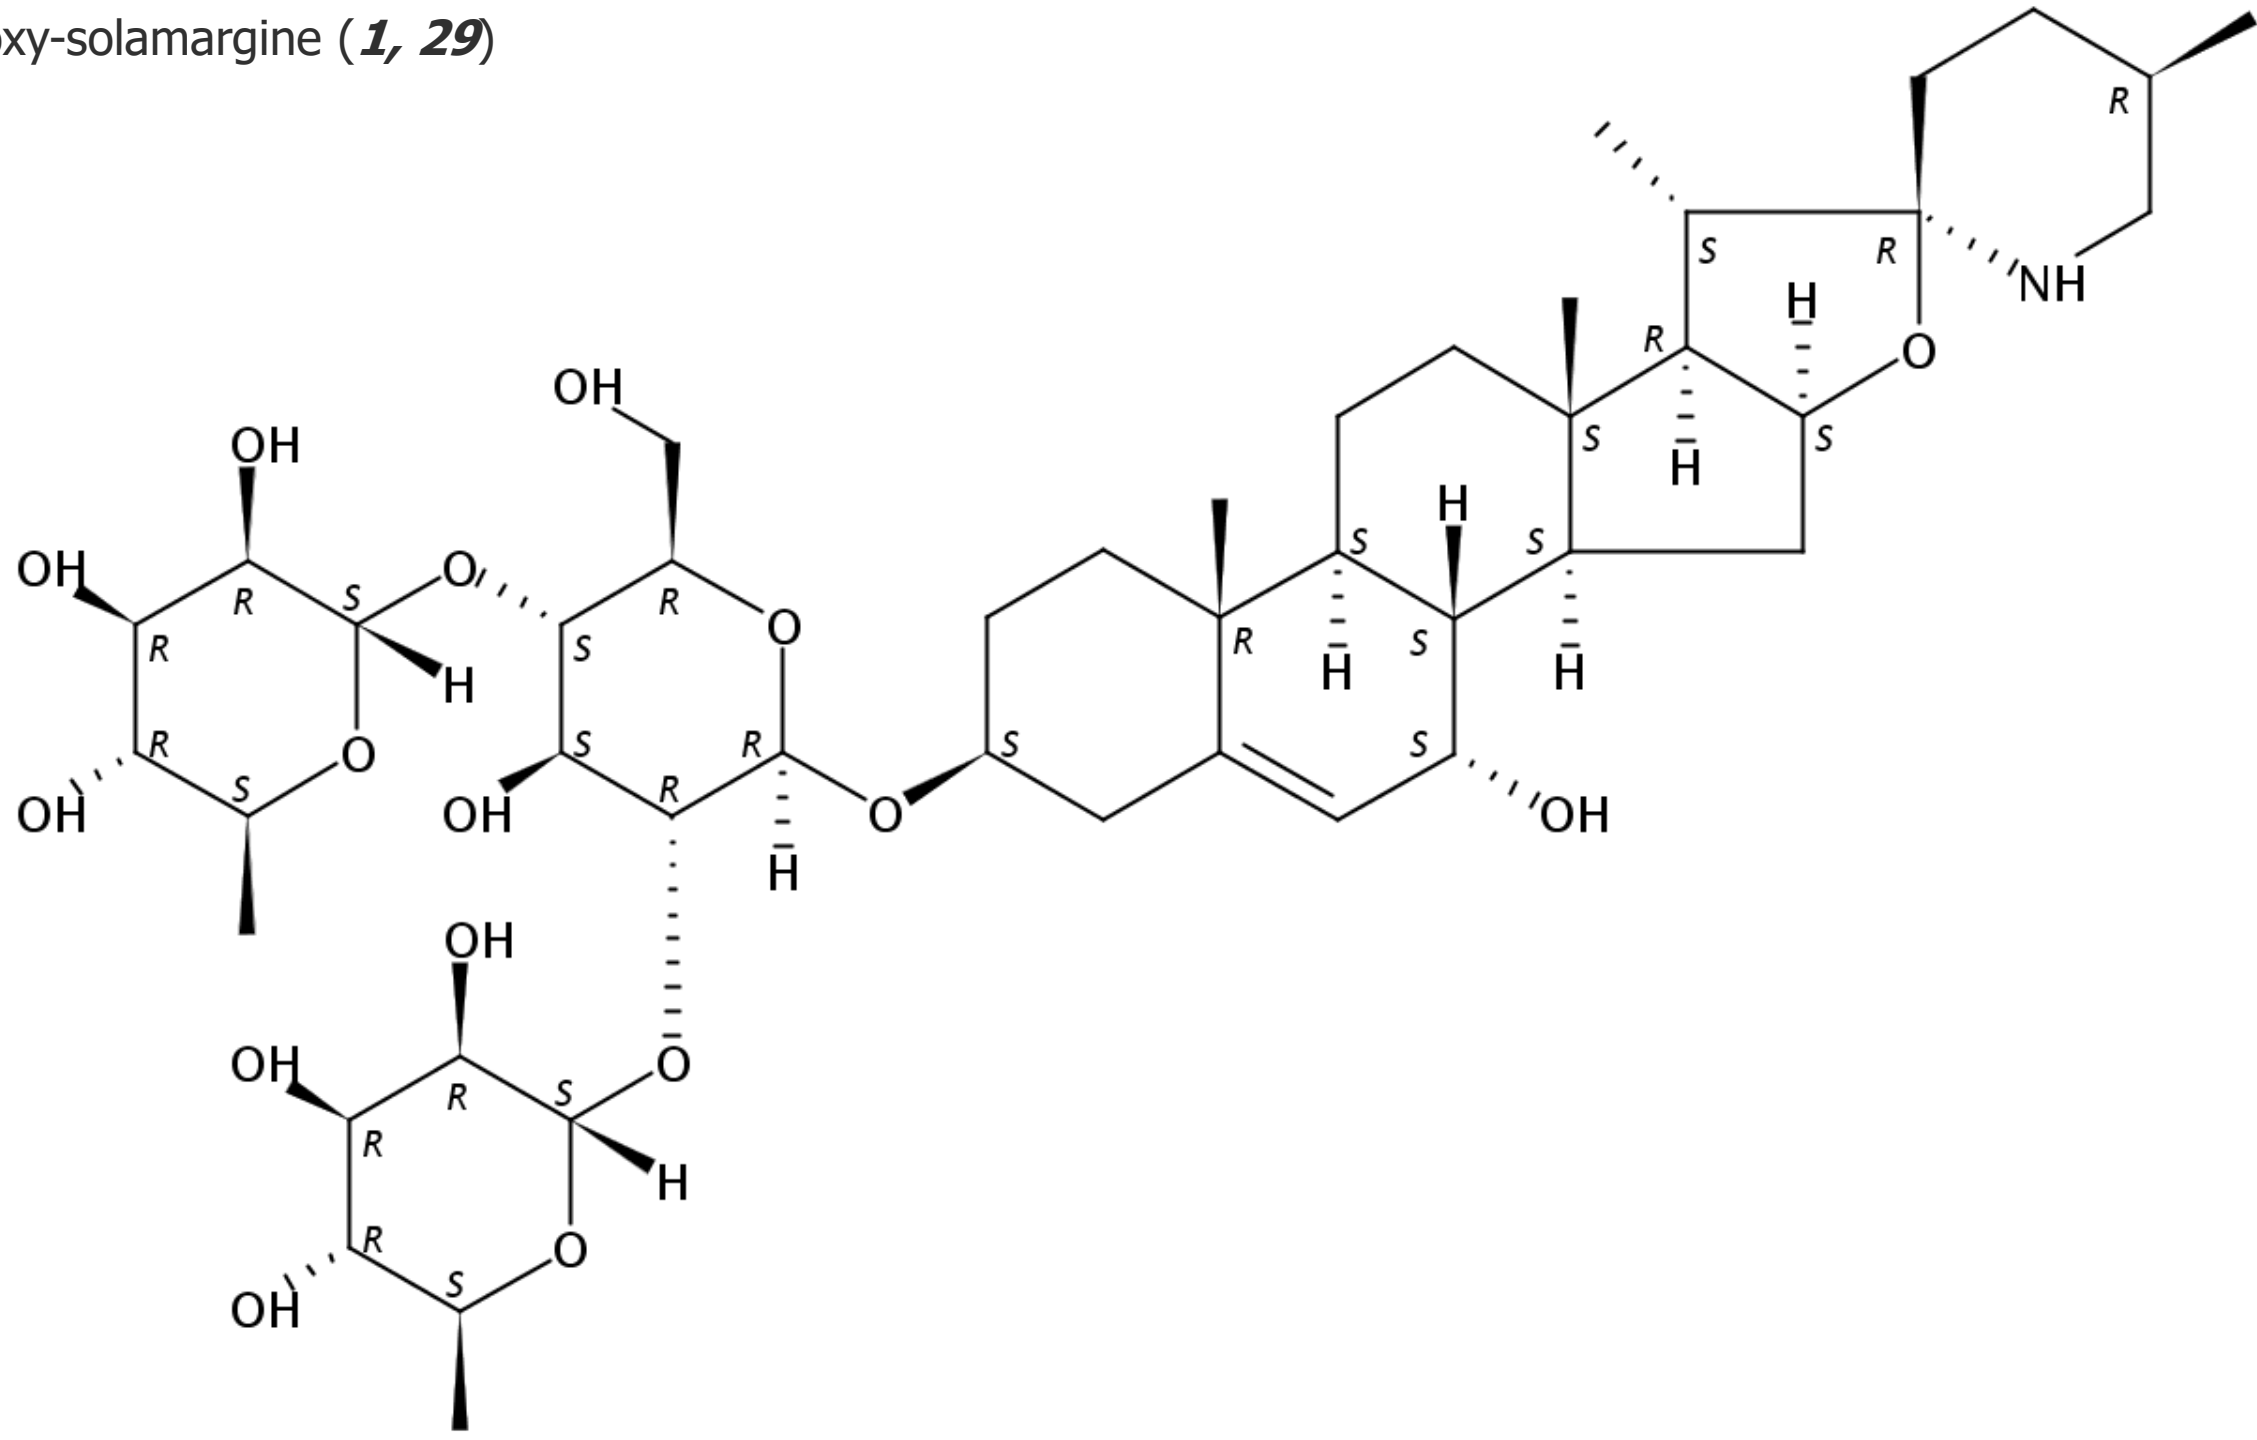

Malonyl-solanandaine (**2**)

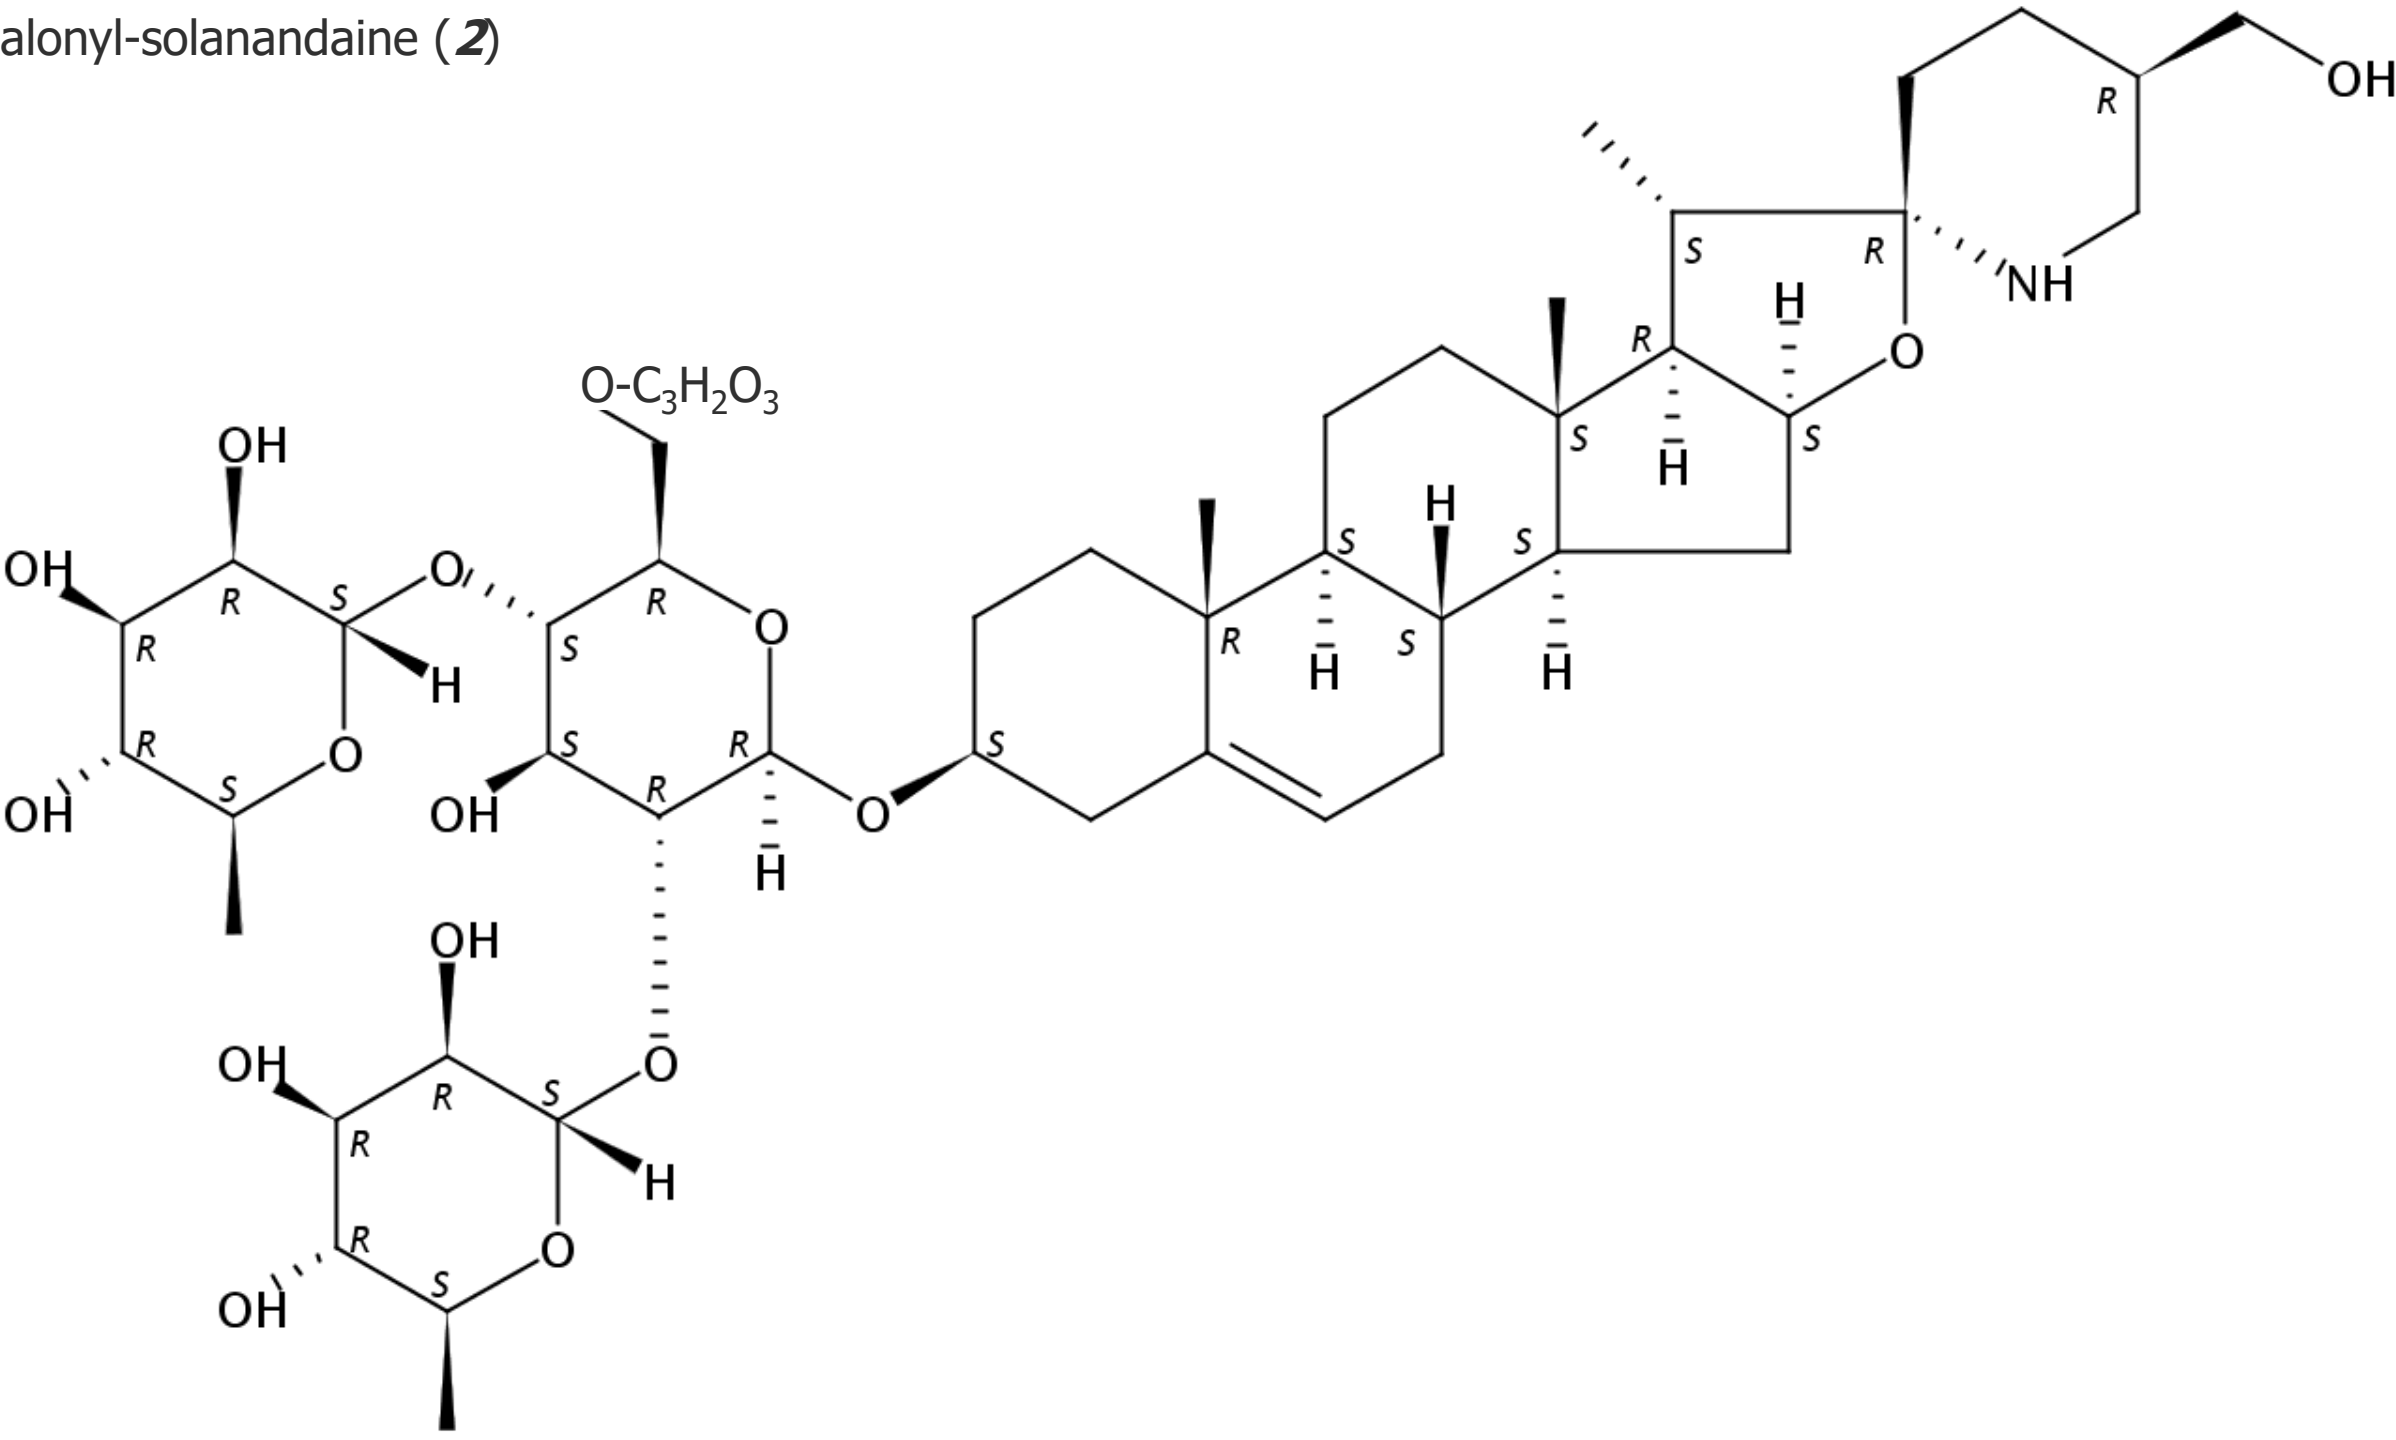

Arudonine (**3**)

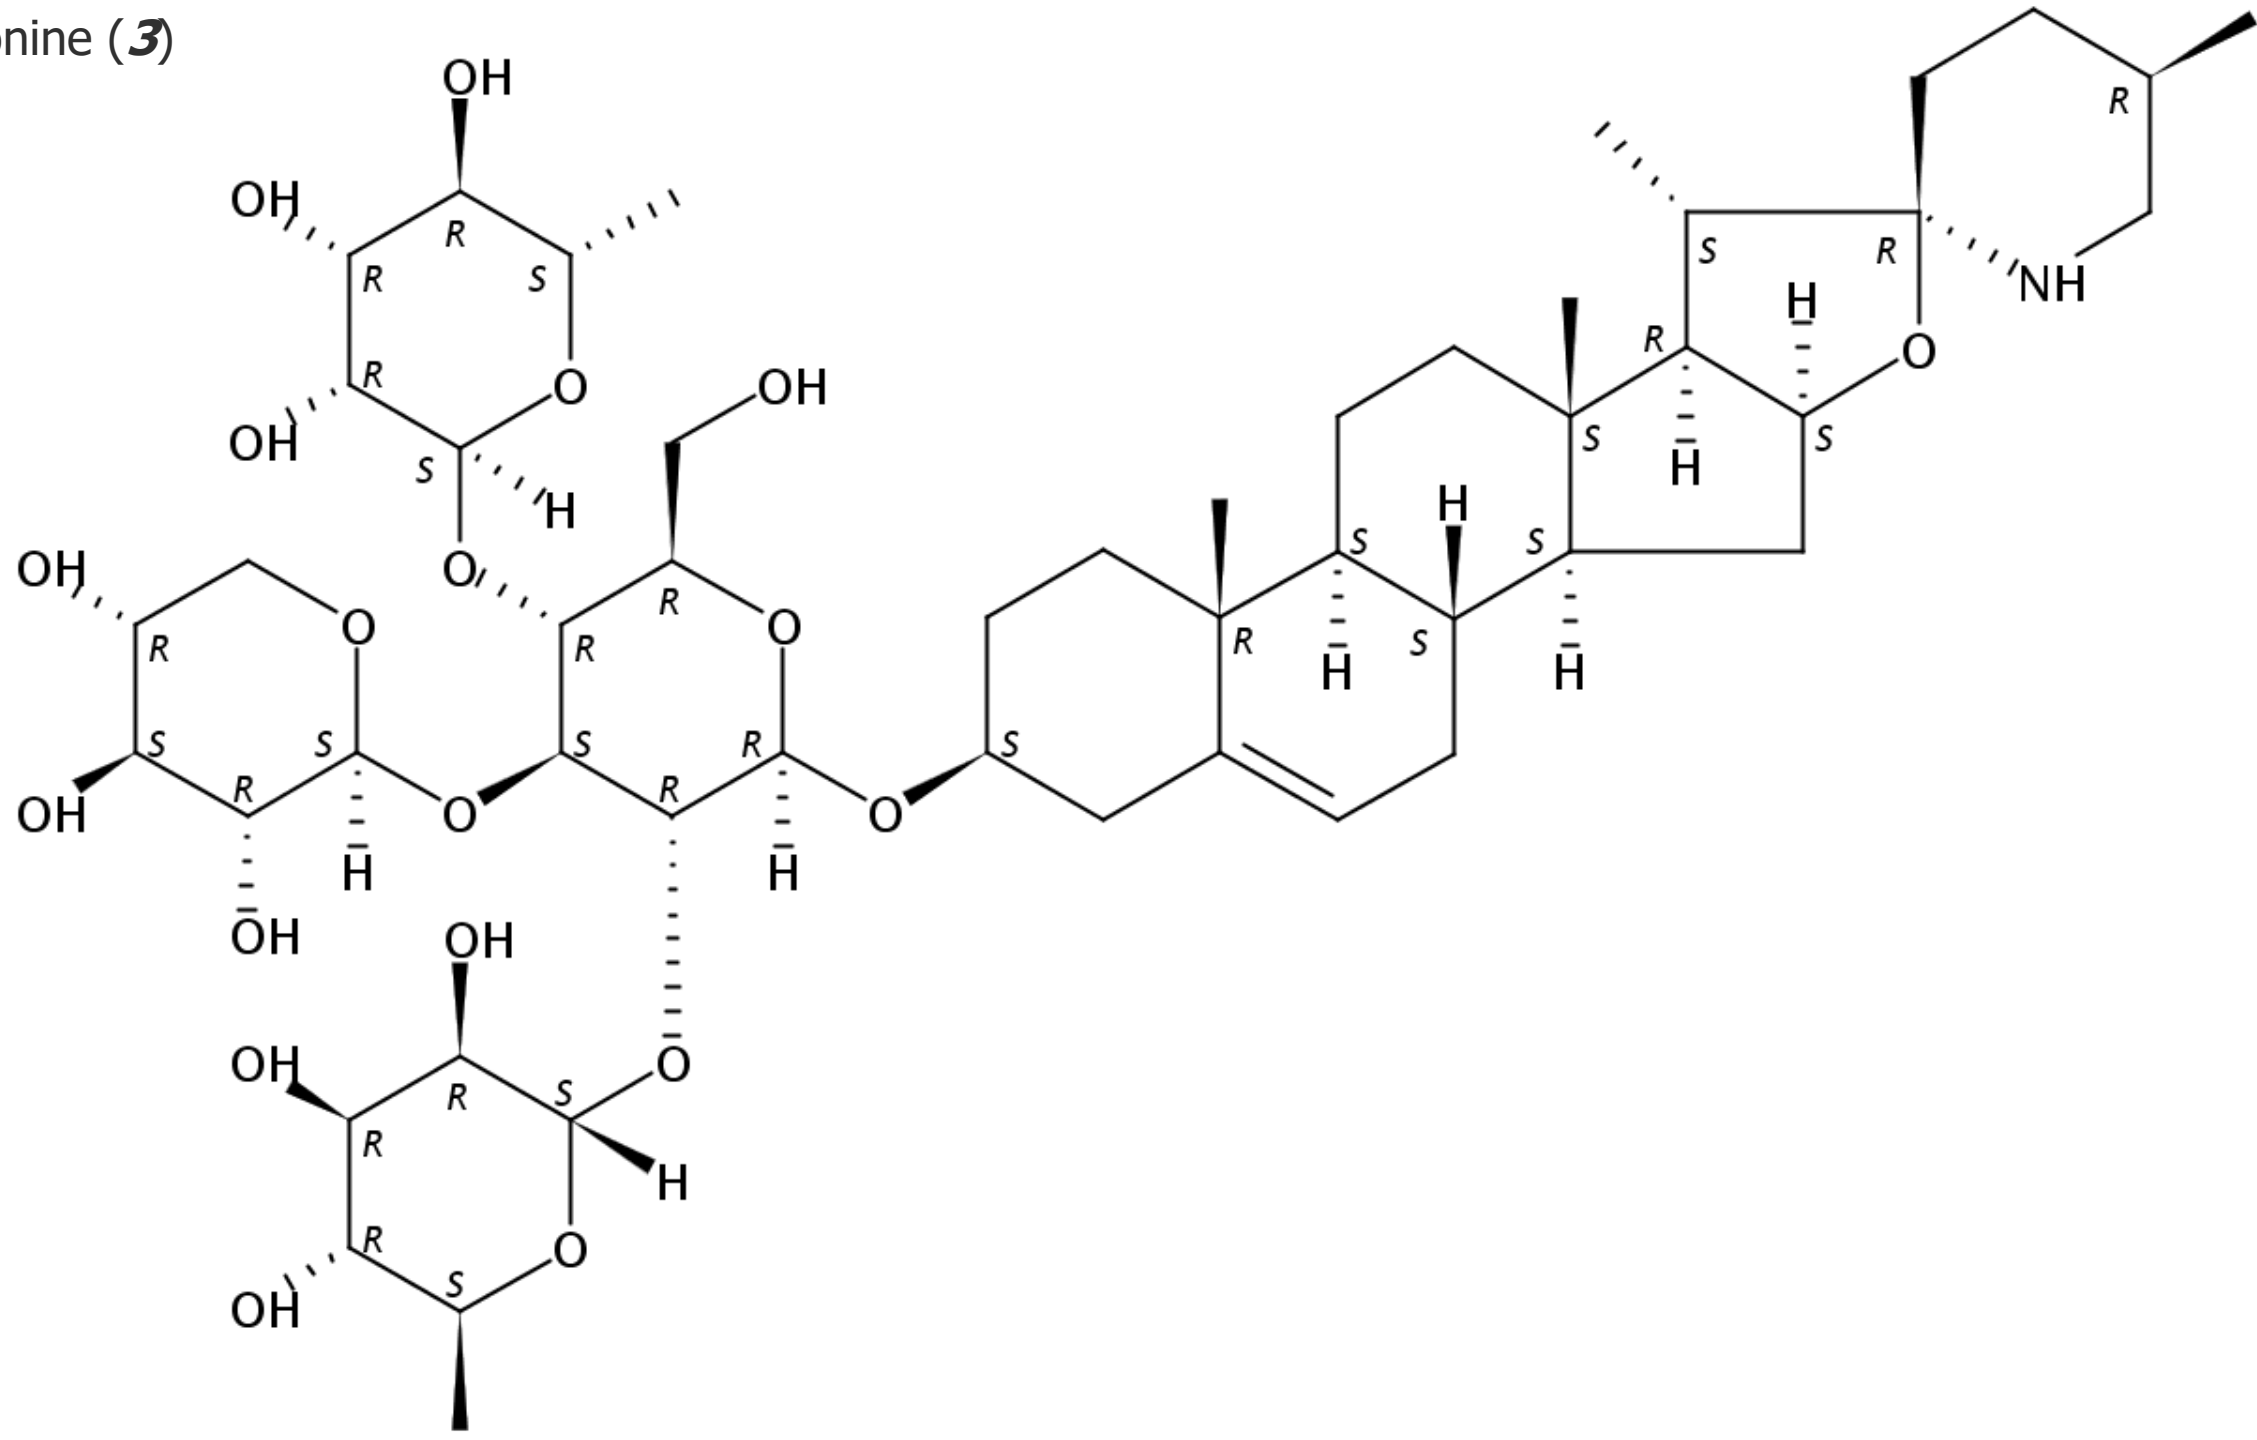

Solamargine (**6**, **17**)

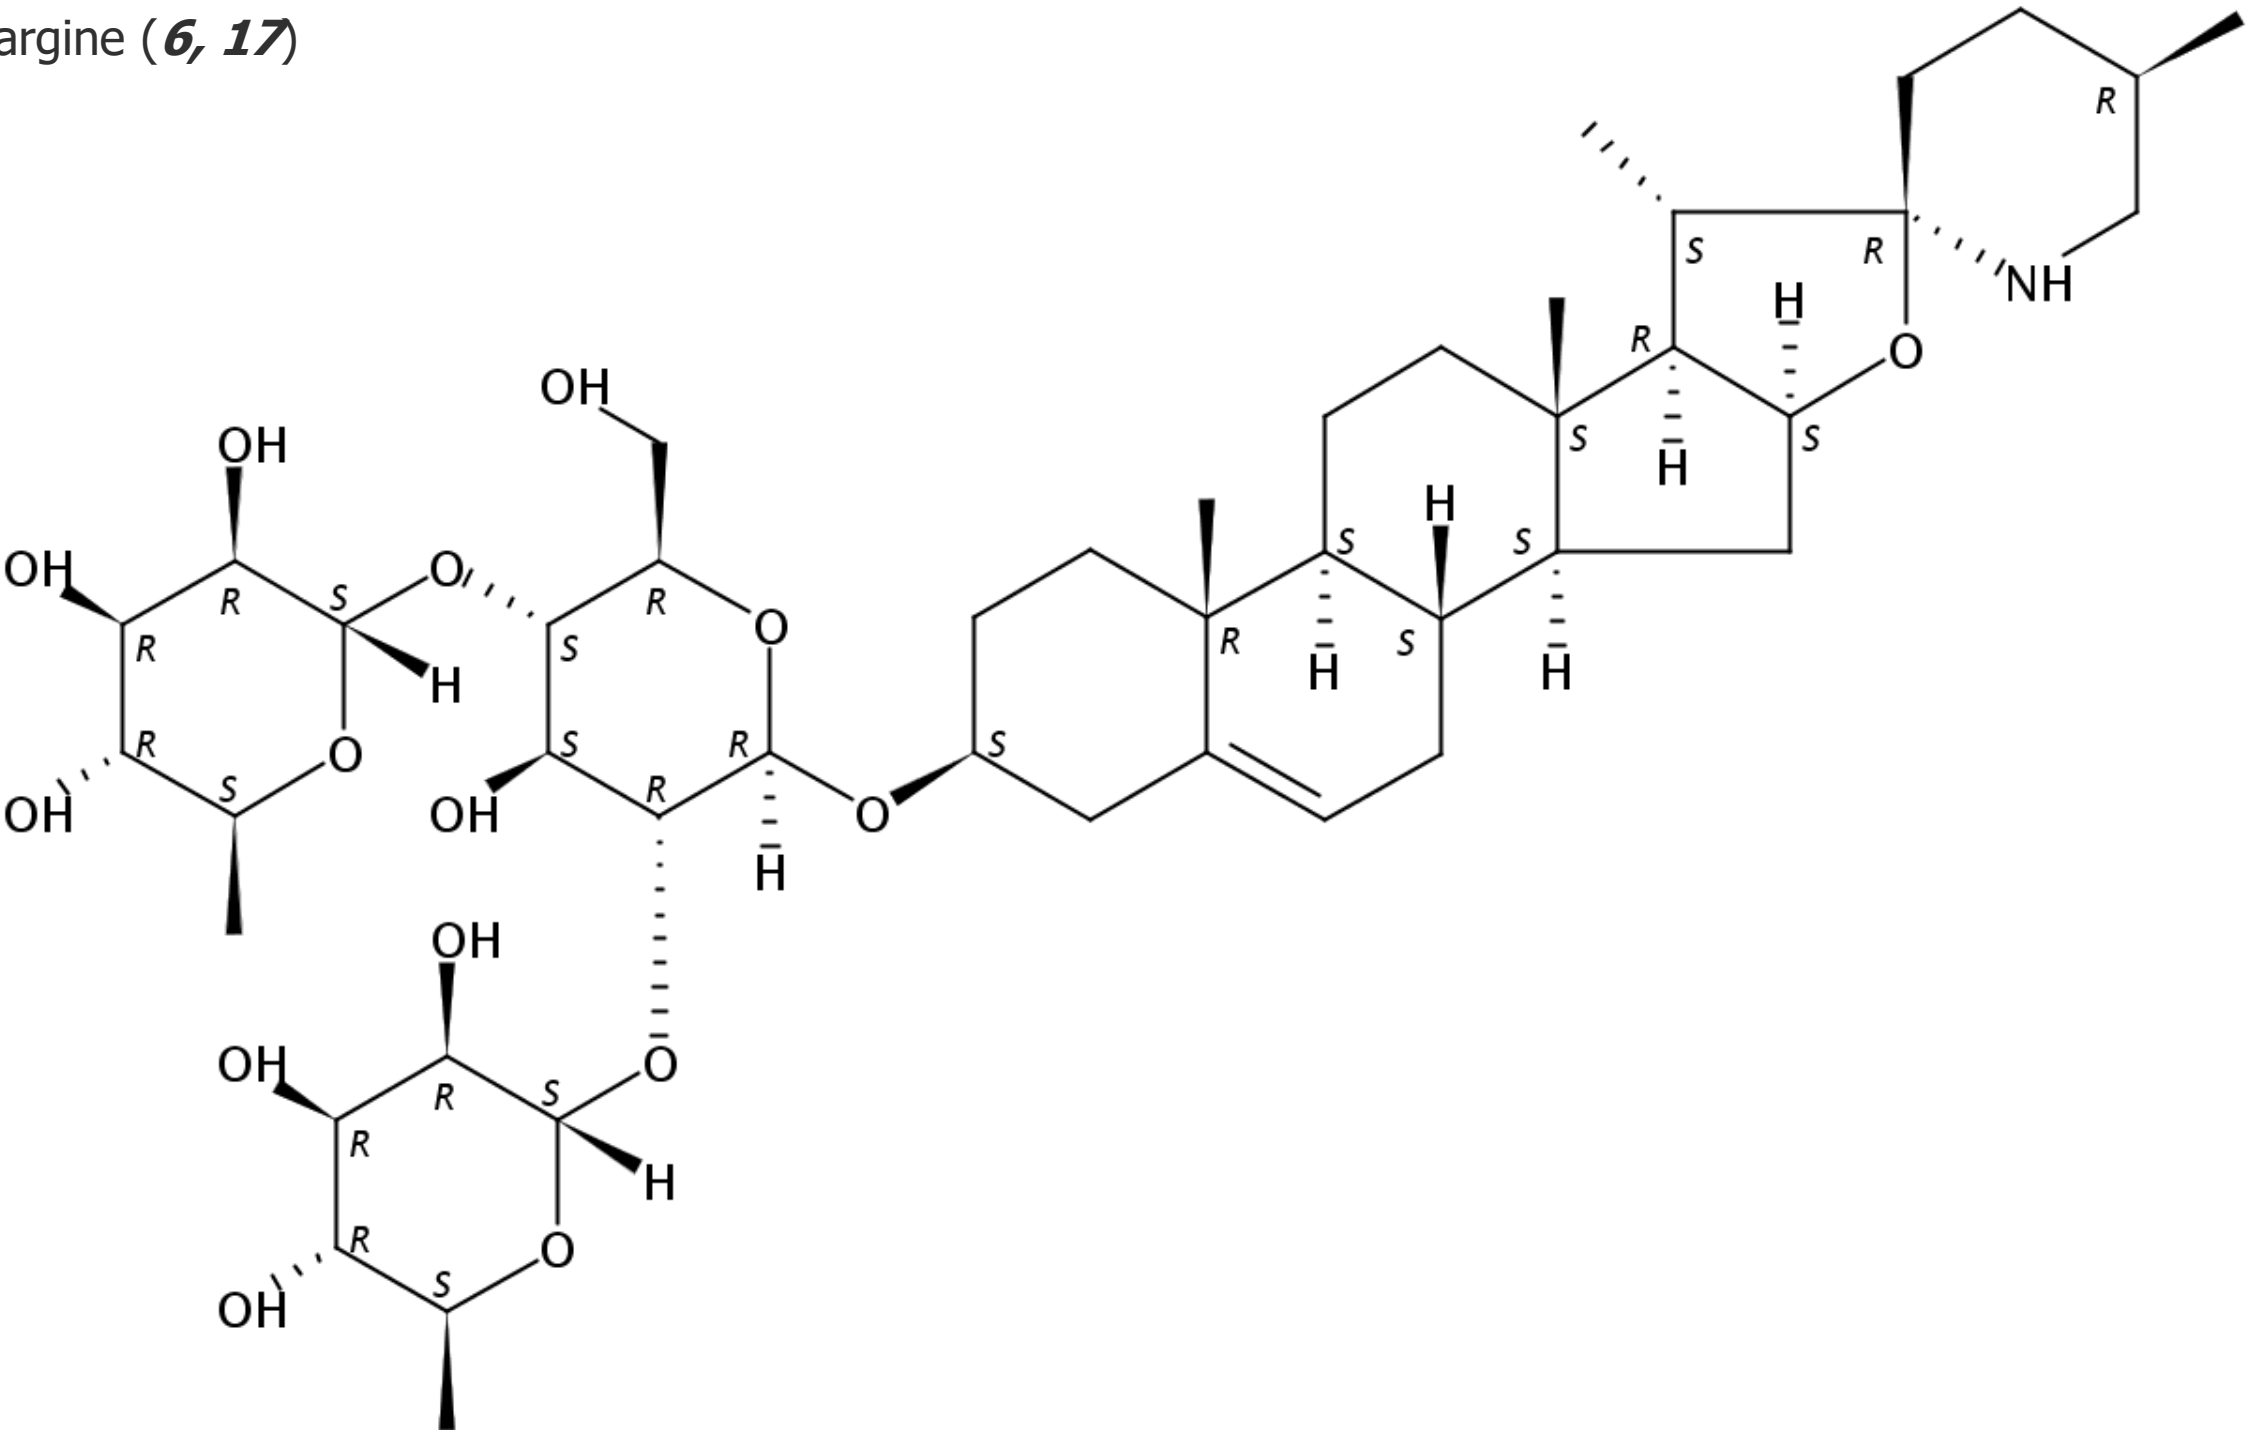

Solaviaside B (7)

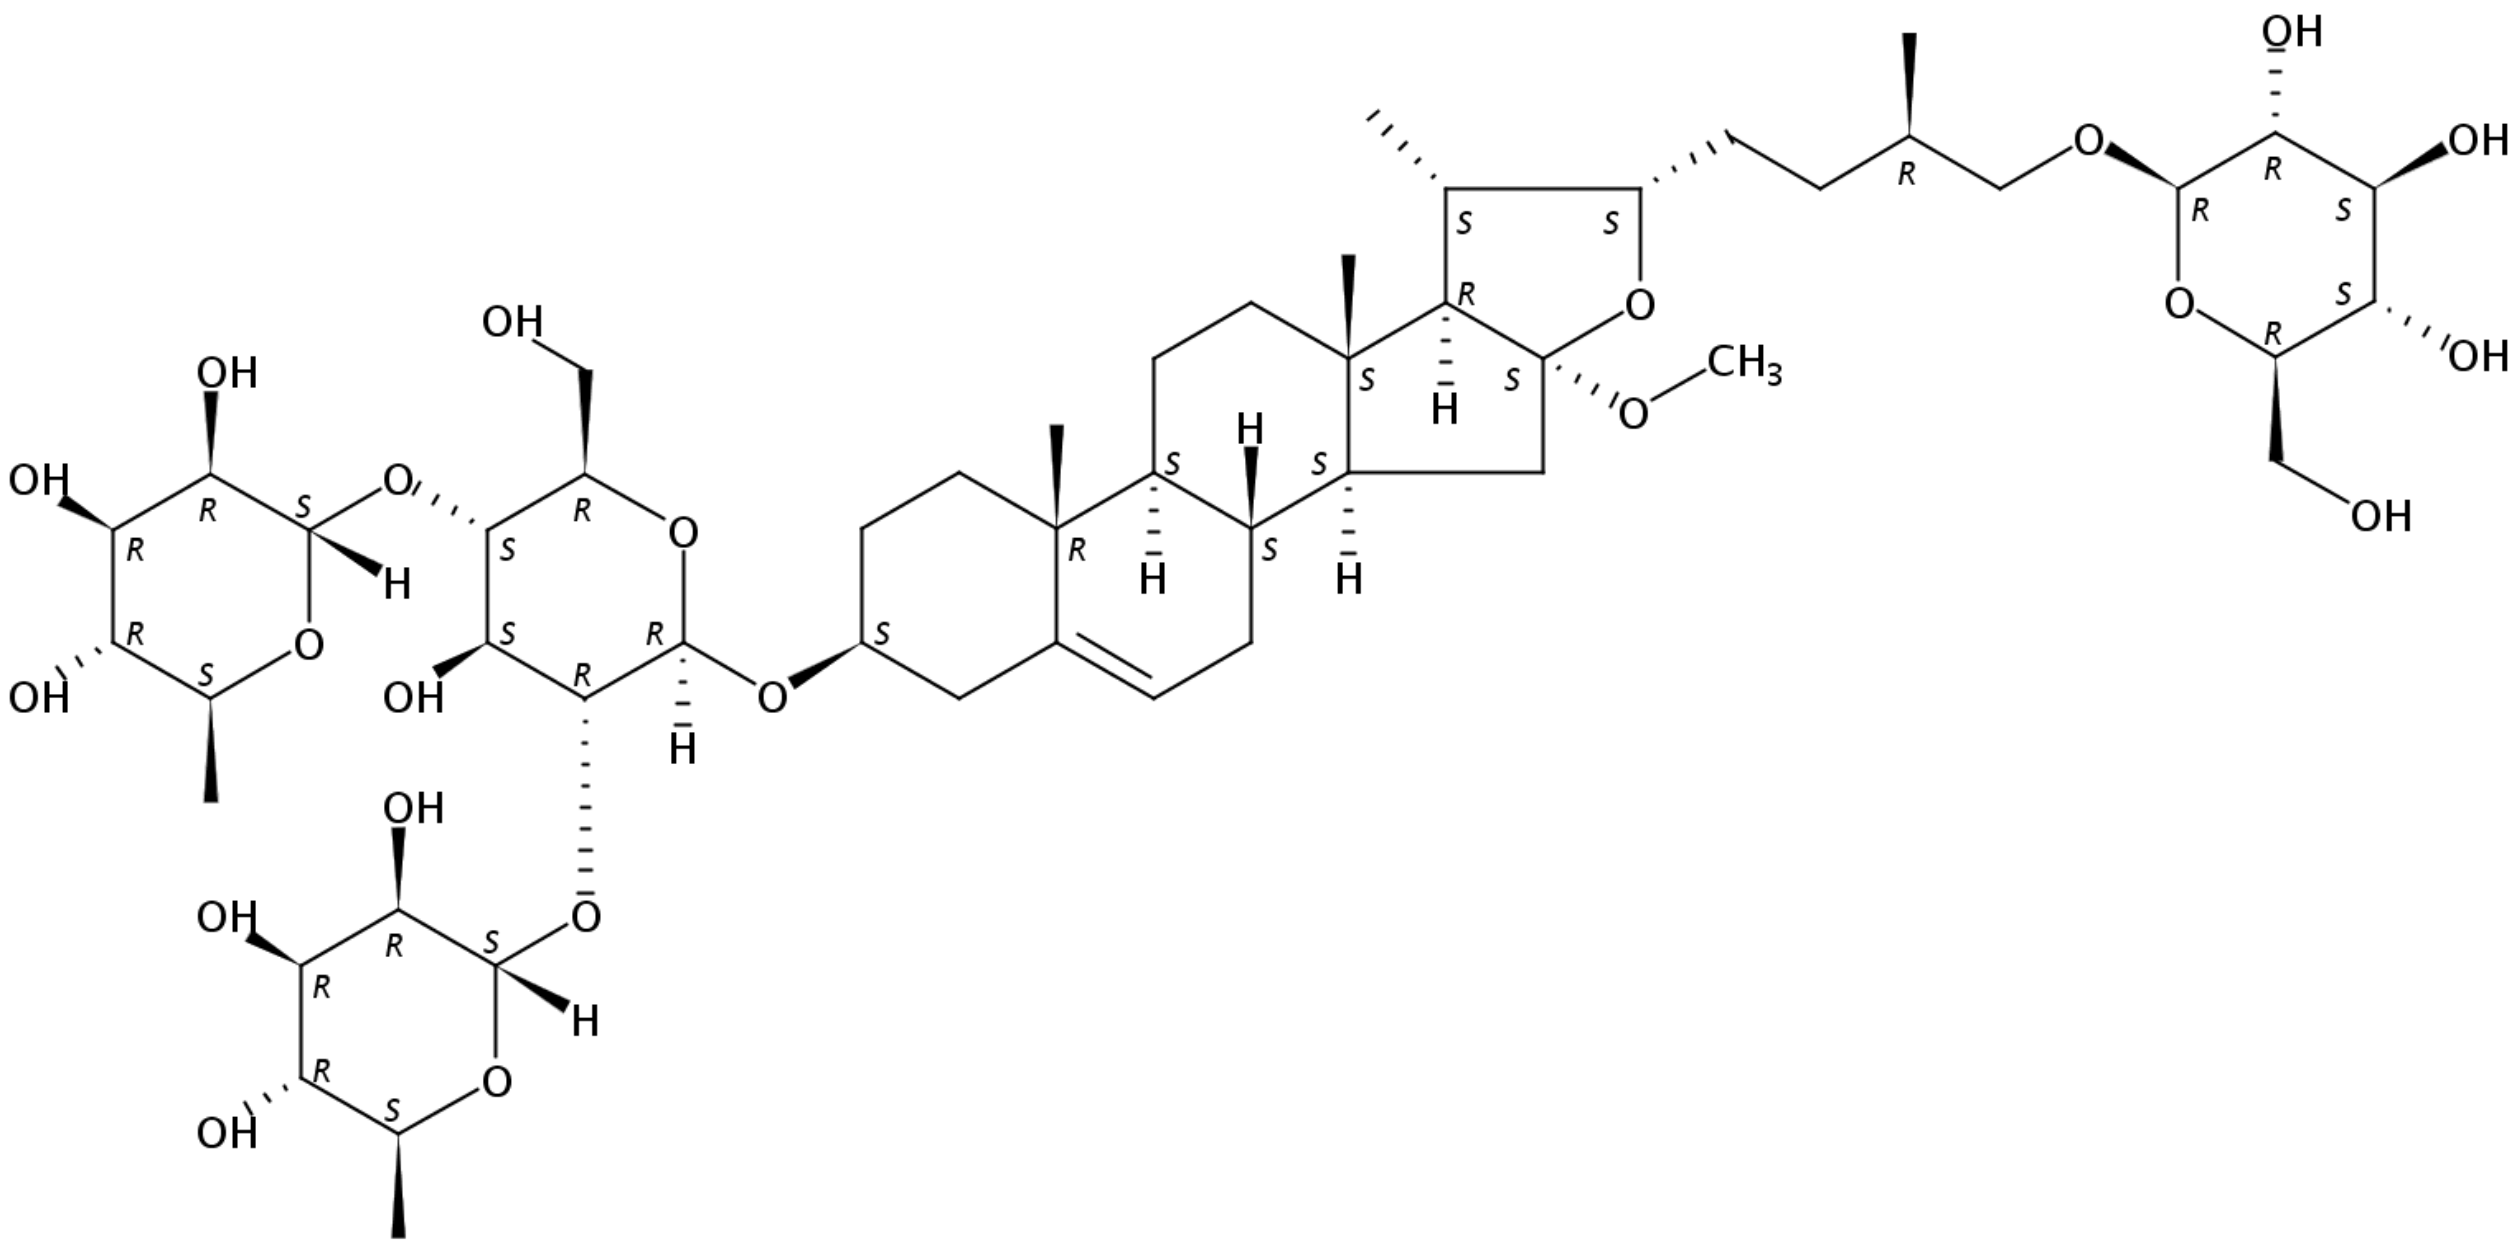

## Solaviaside B (**9**)

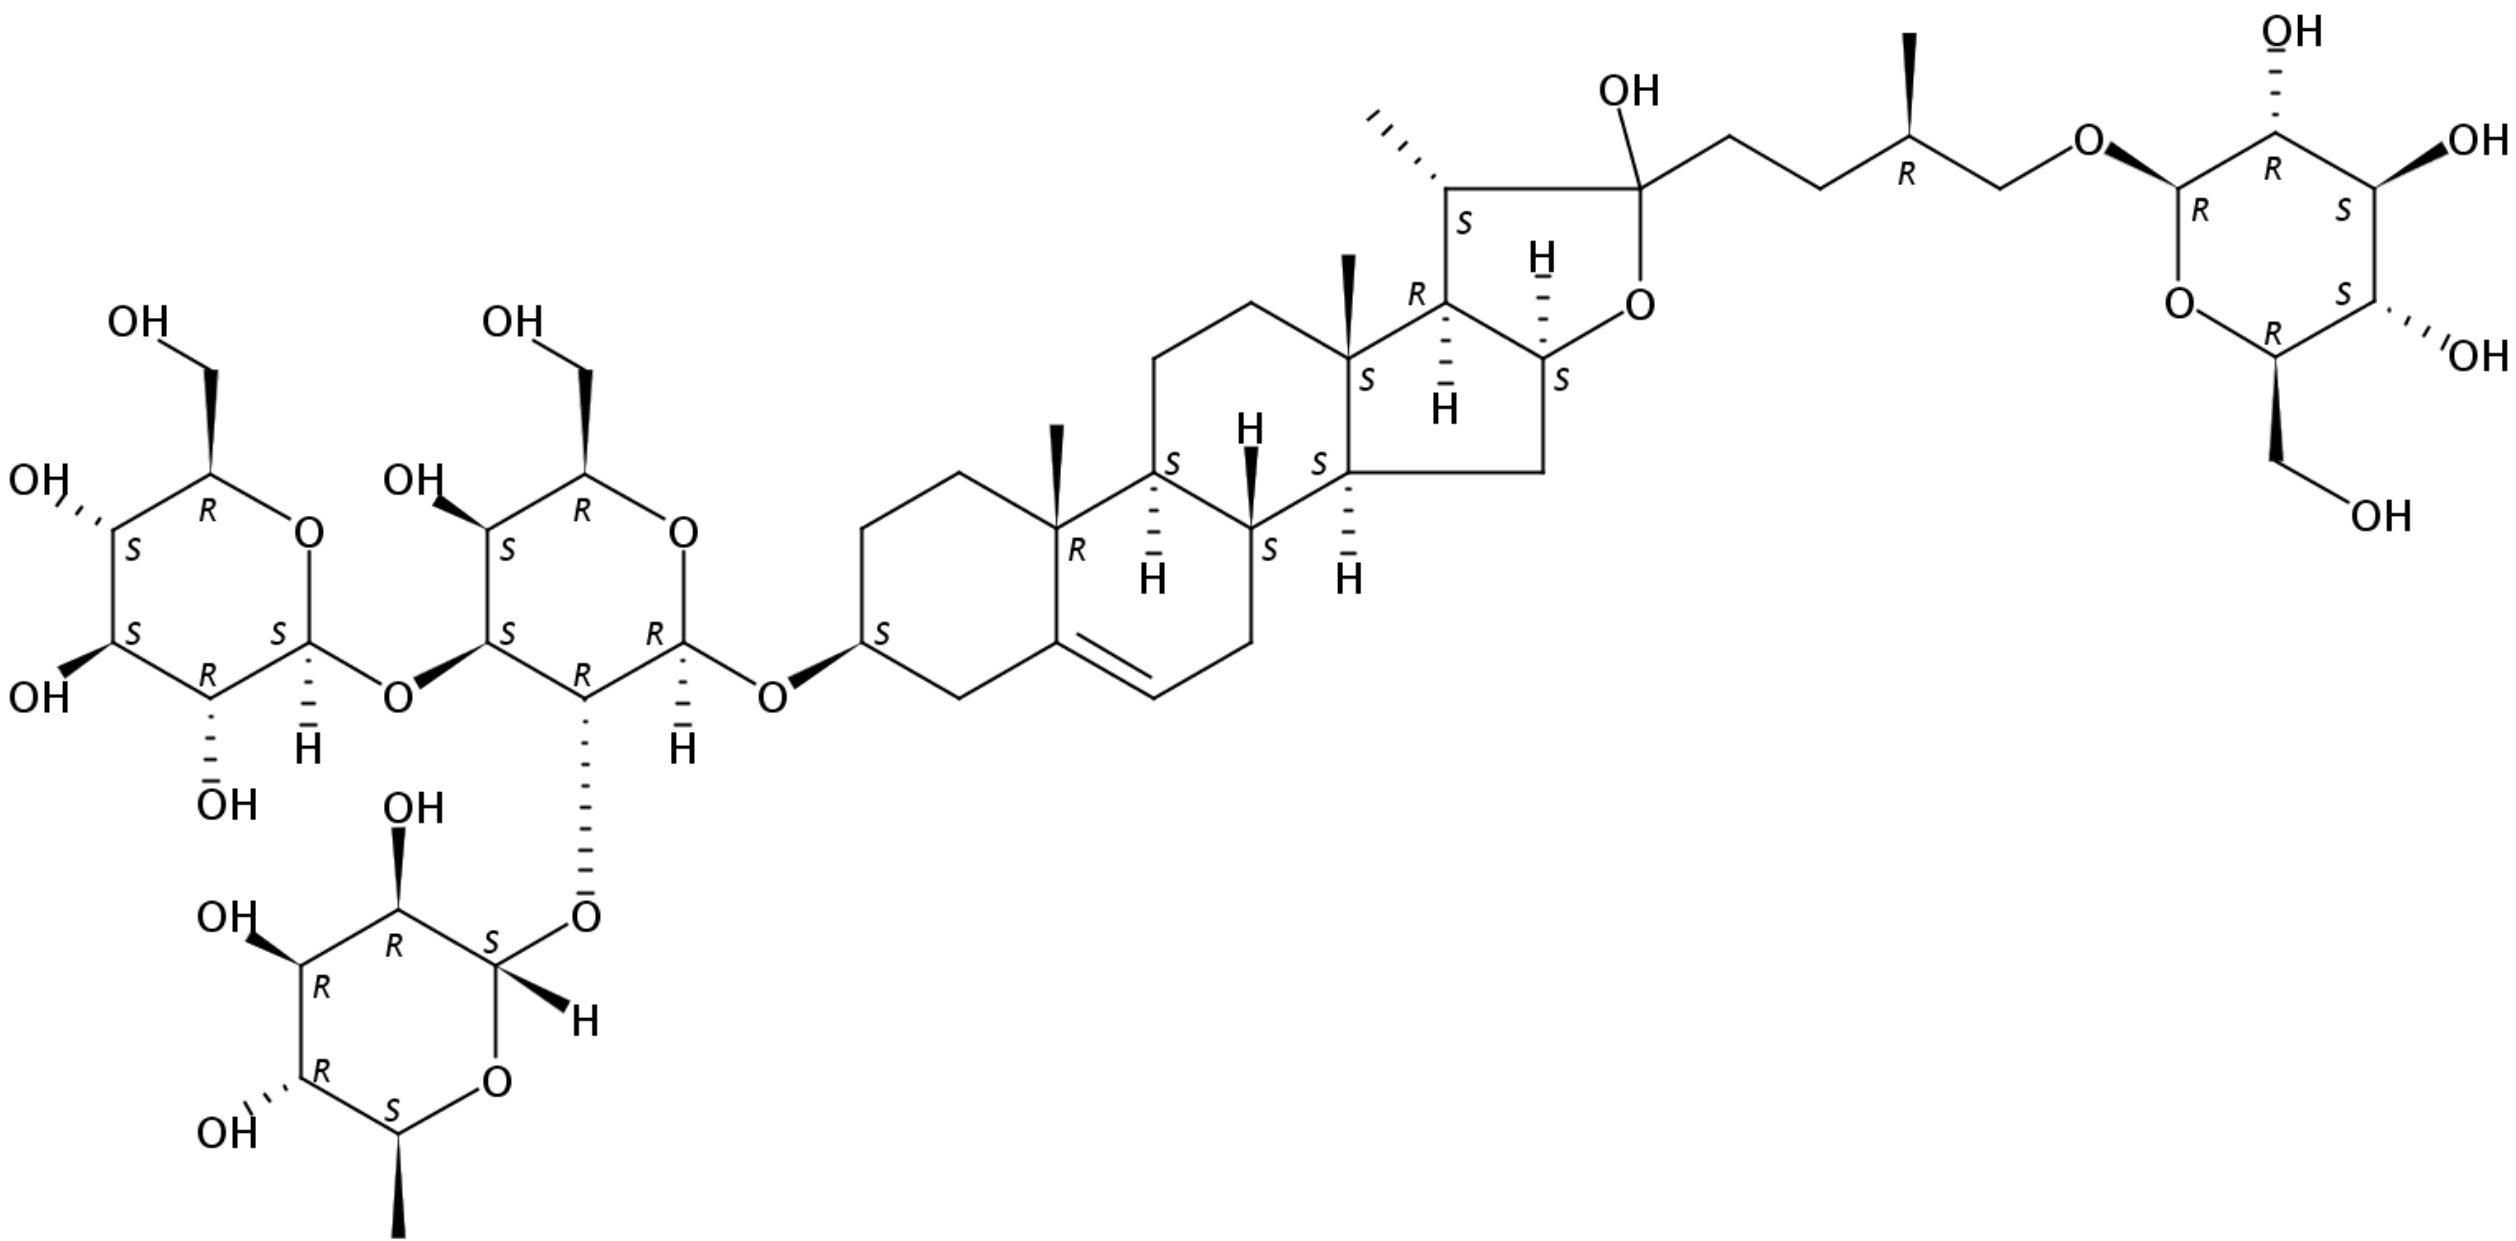

Solanigroside H (**12**, **13**)

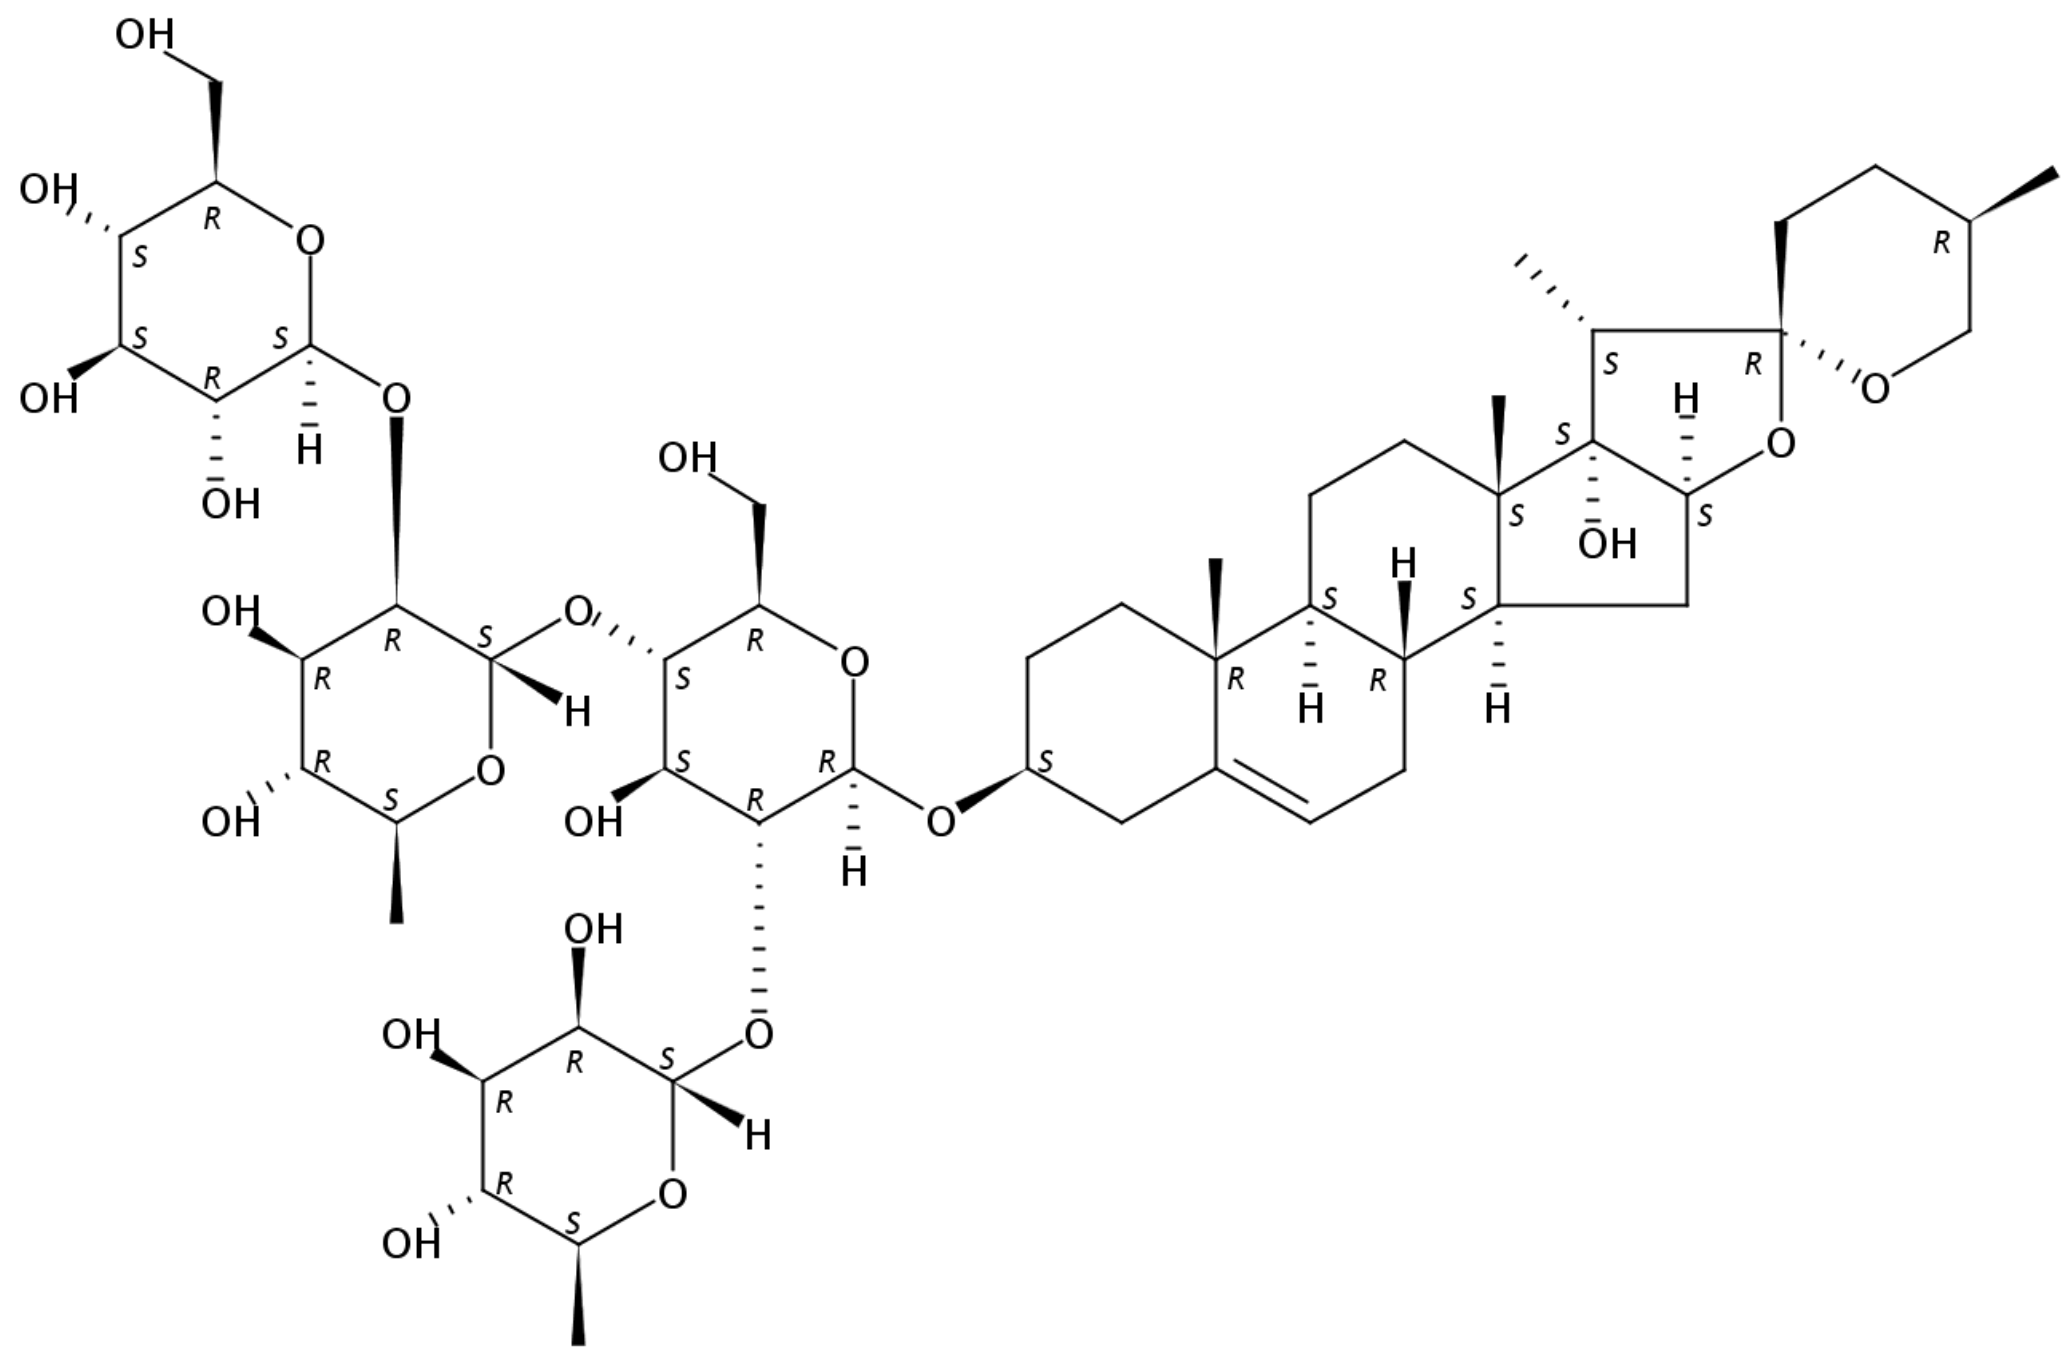



Solamarine (**15**)

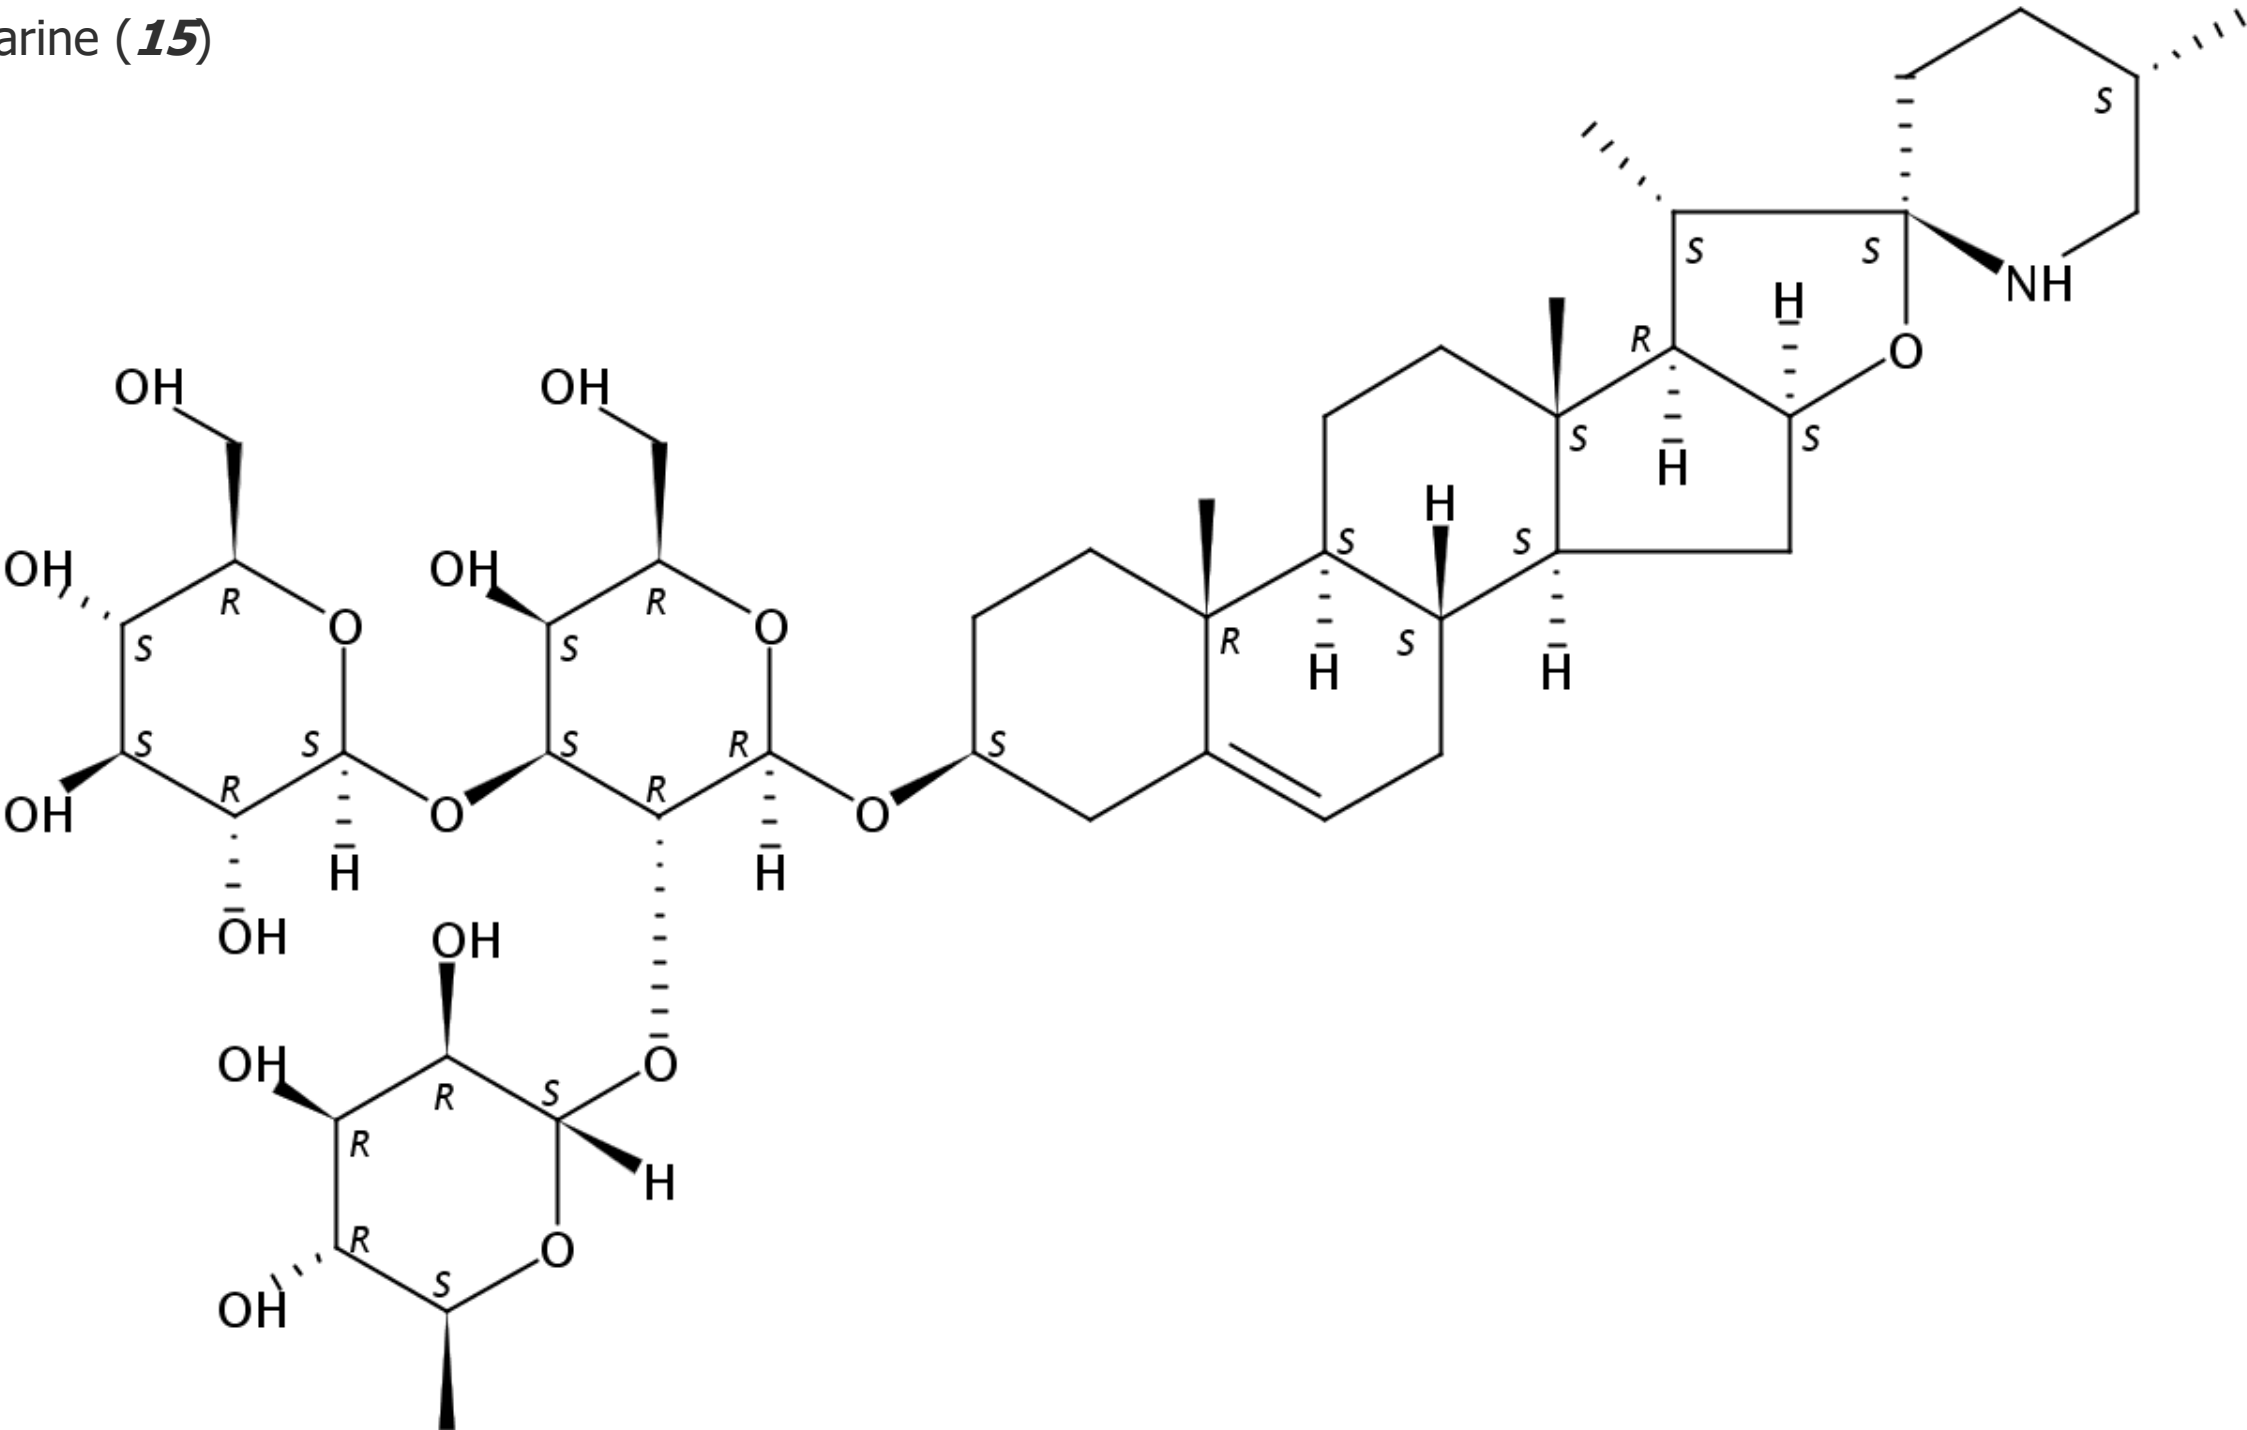

Sycophantine (**16**)

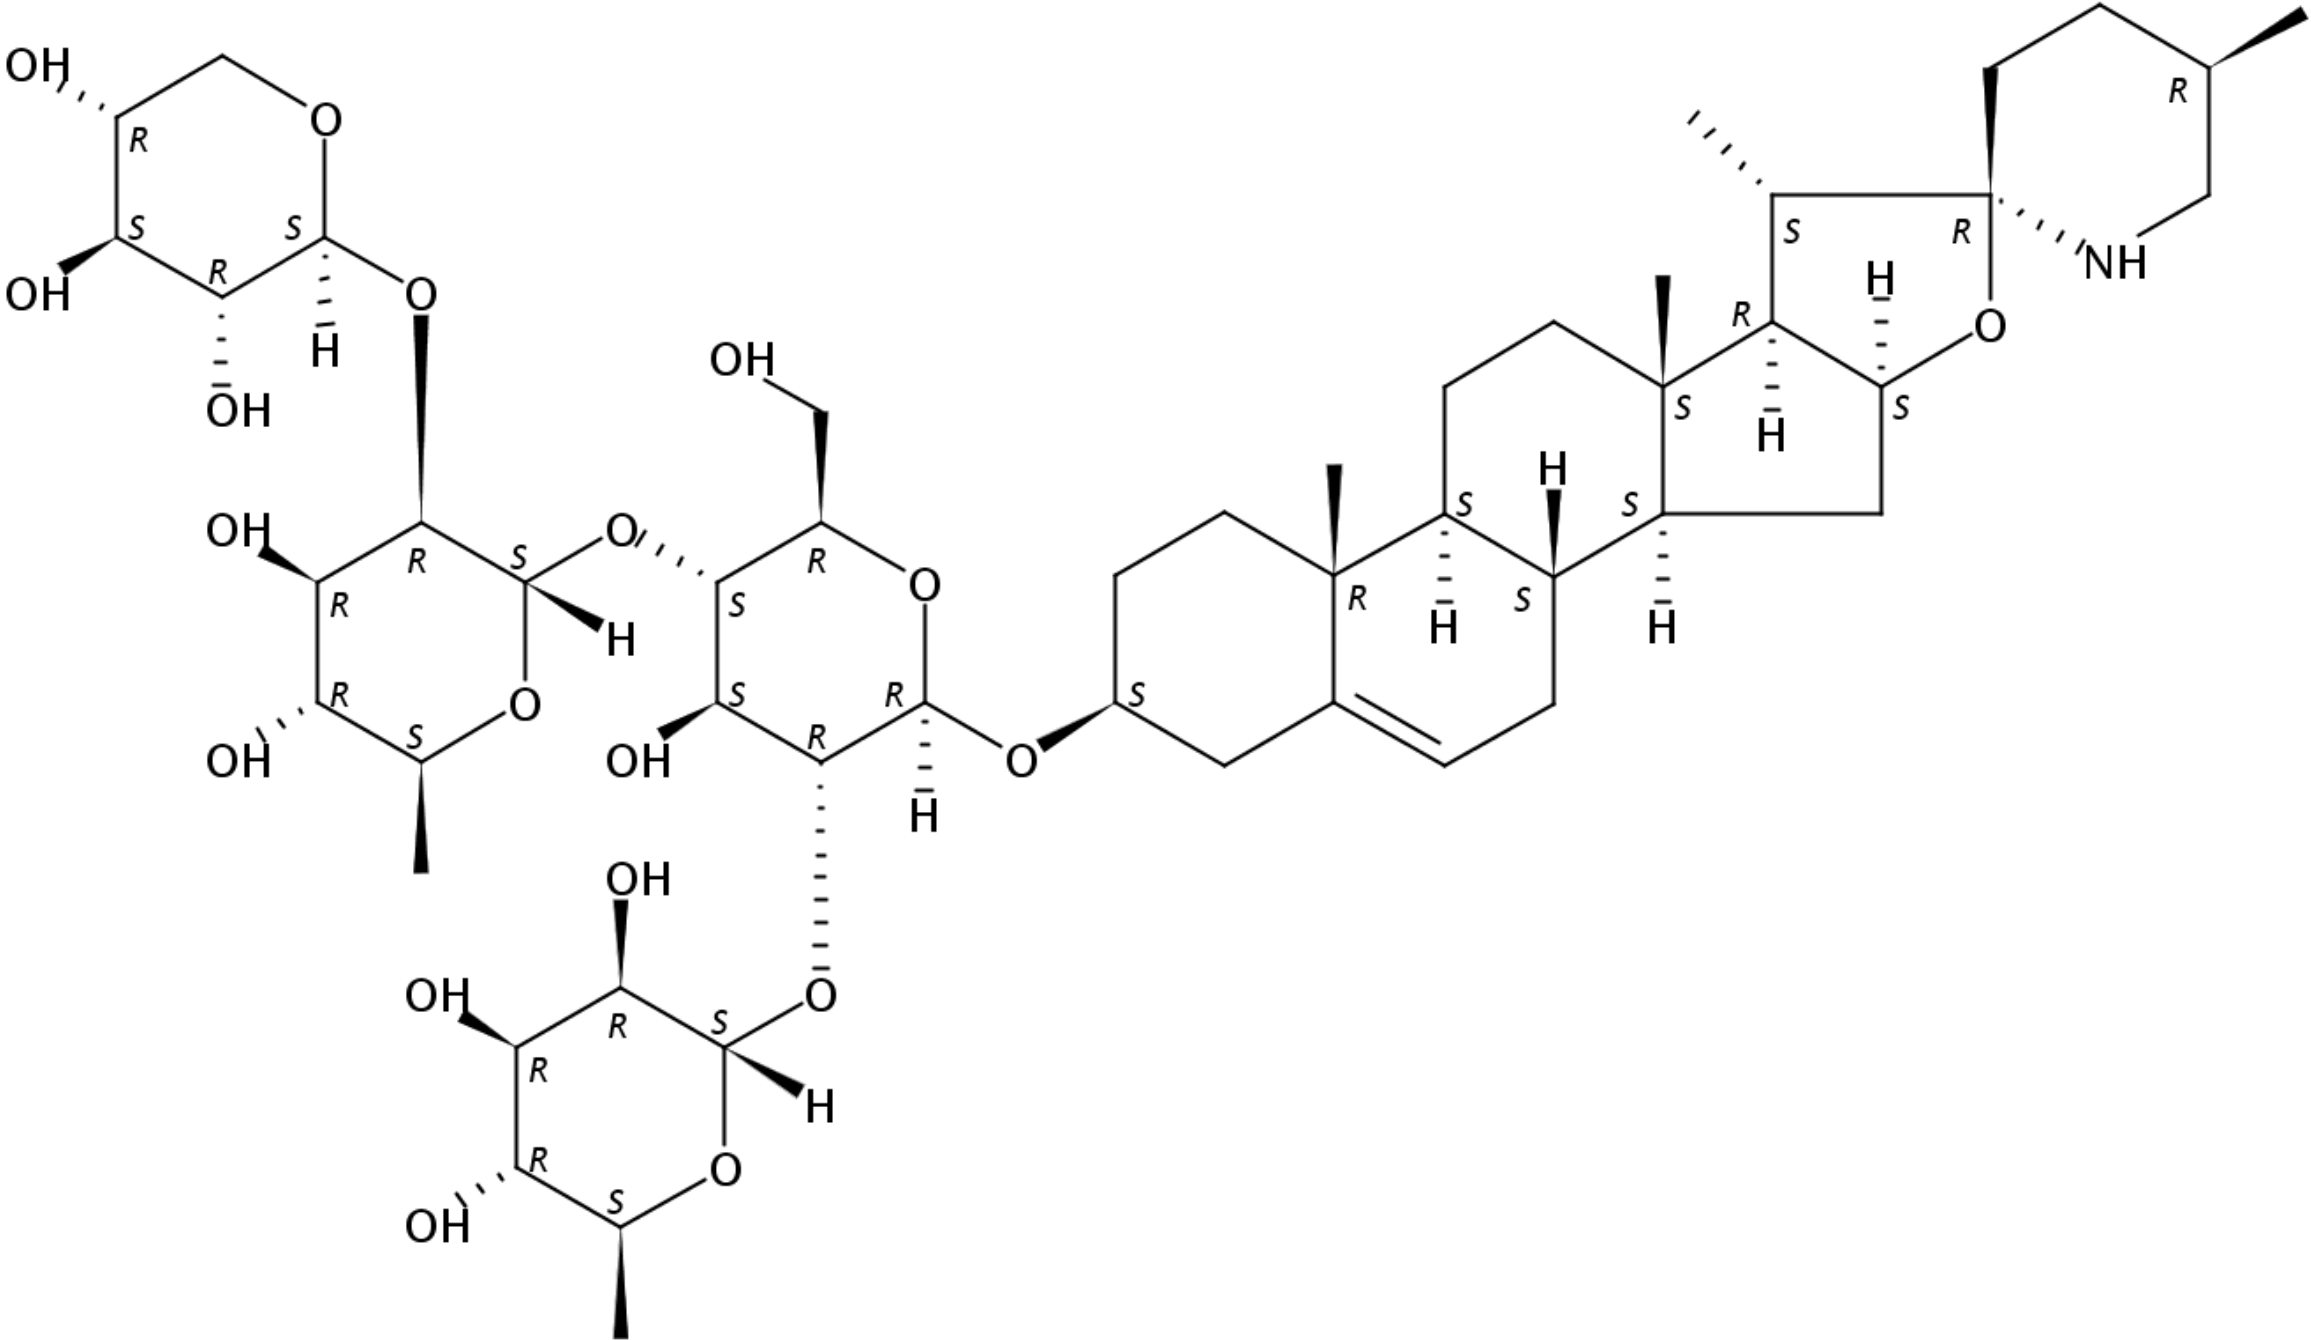

Solanigroside Y5 (**20**)

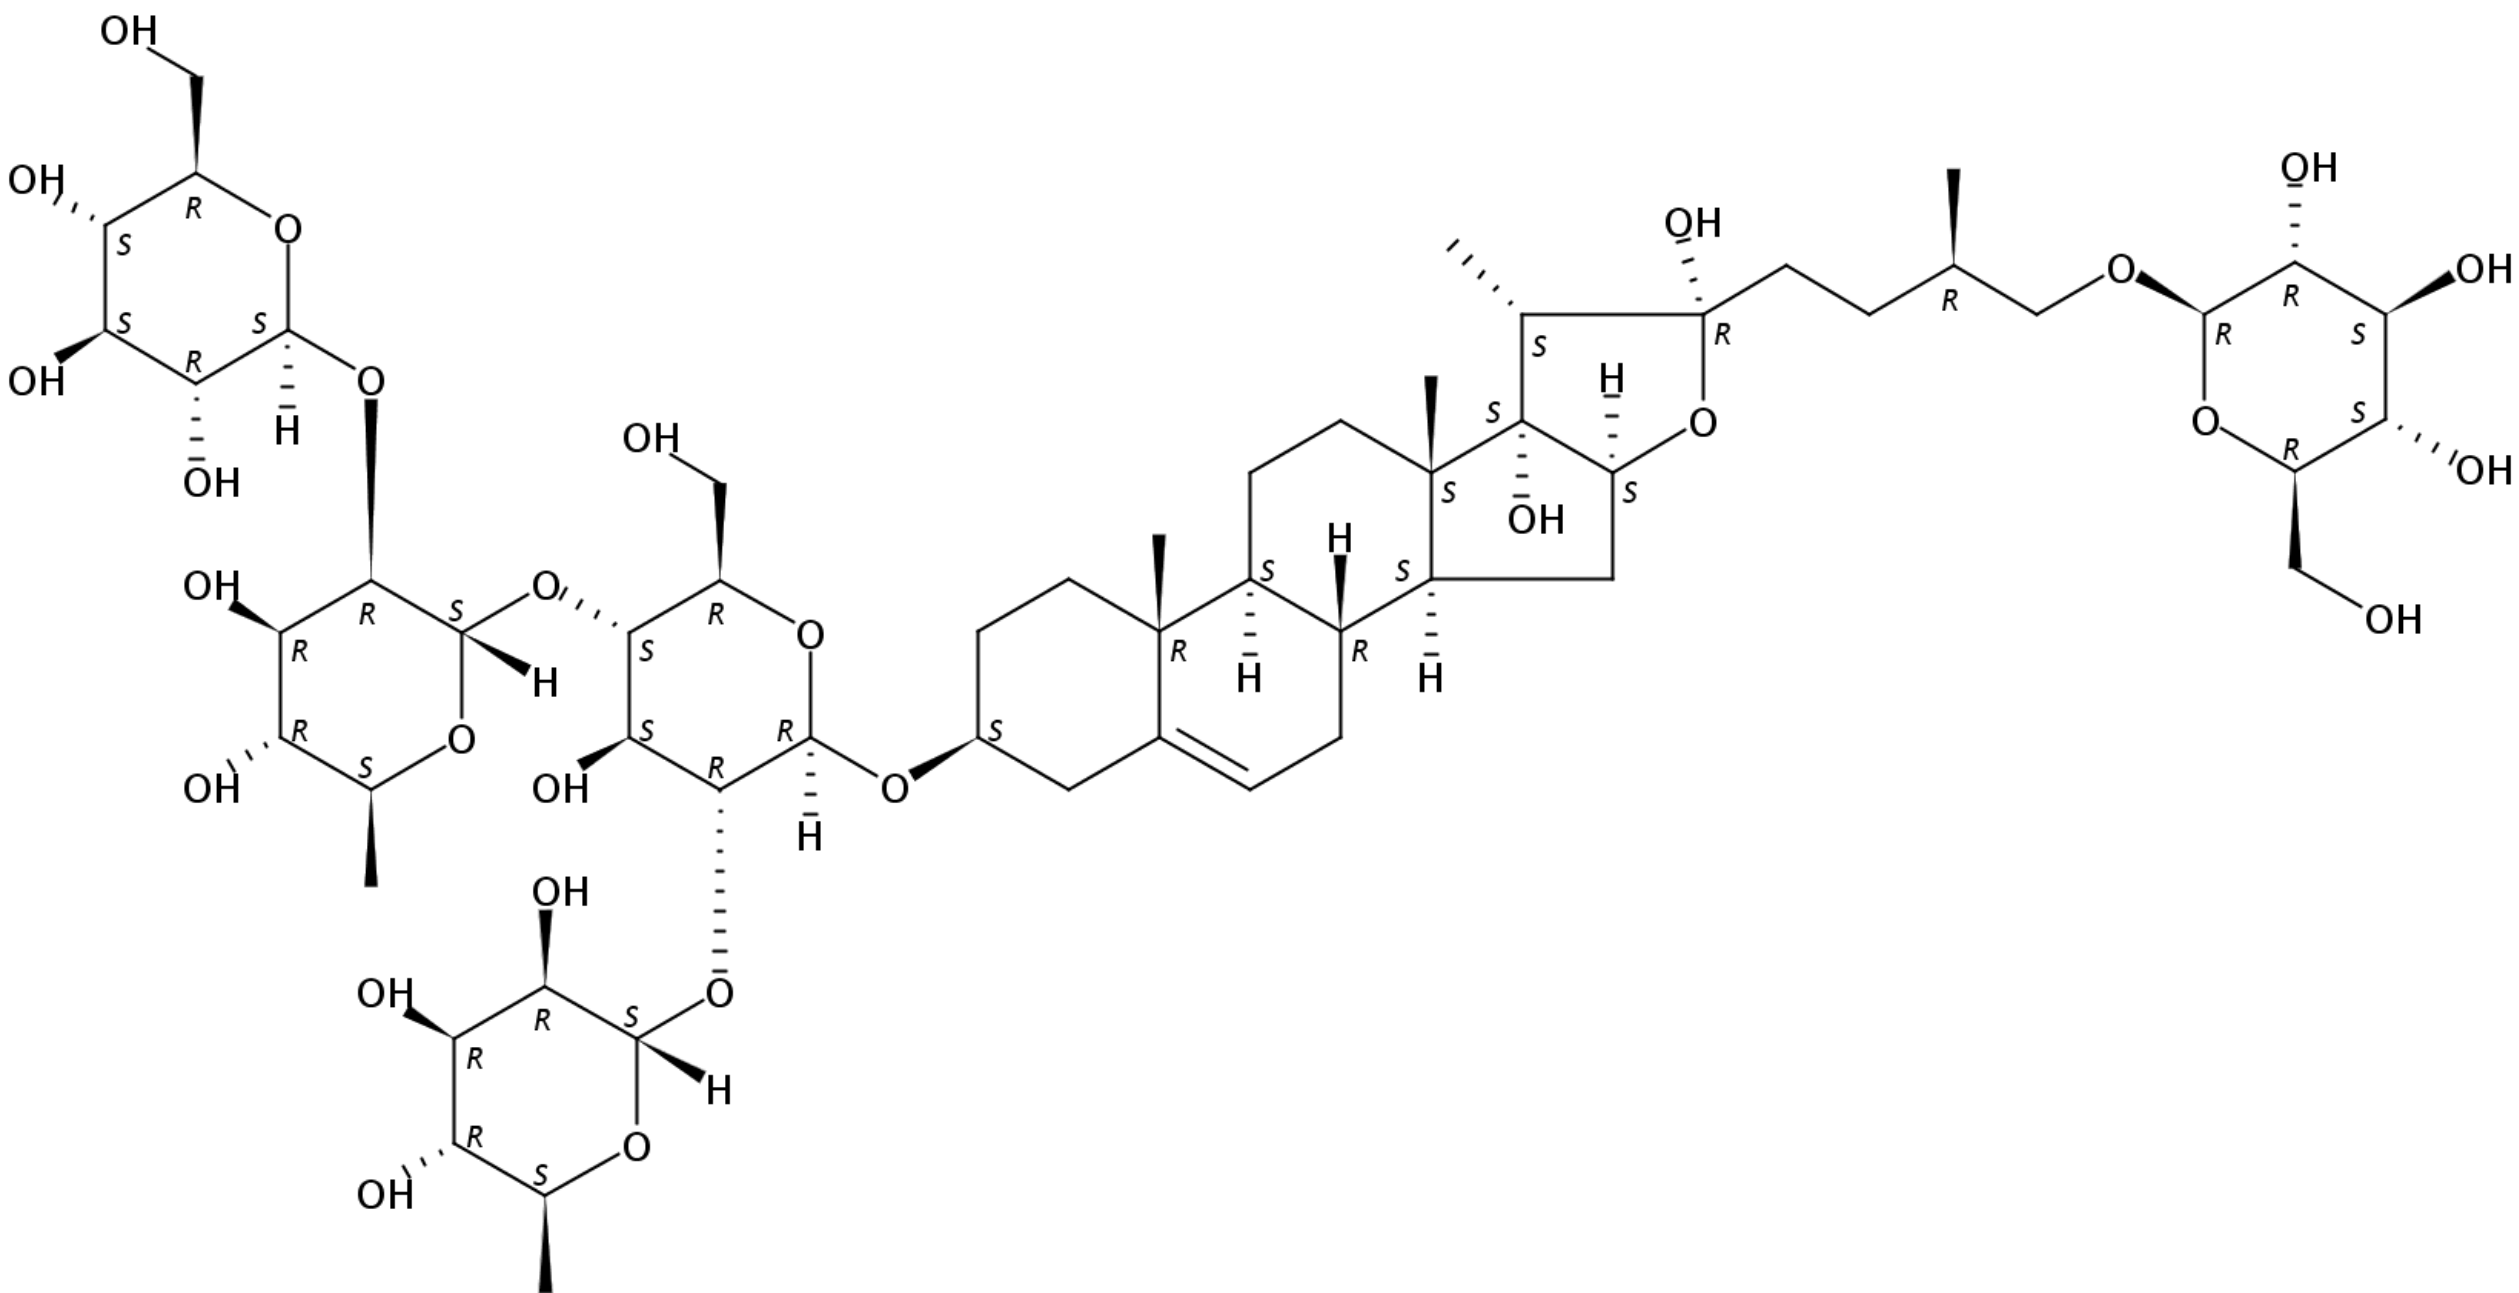

Hydroxysycophantine (**21**)

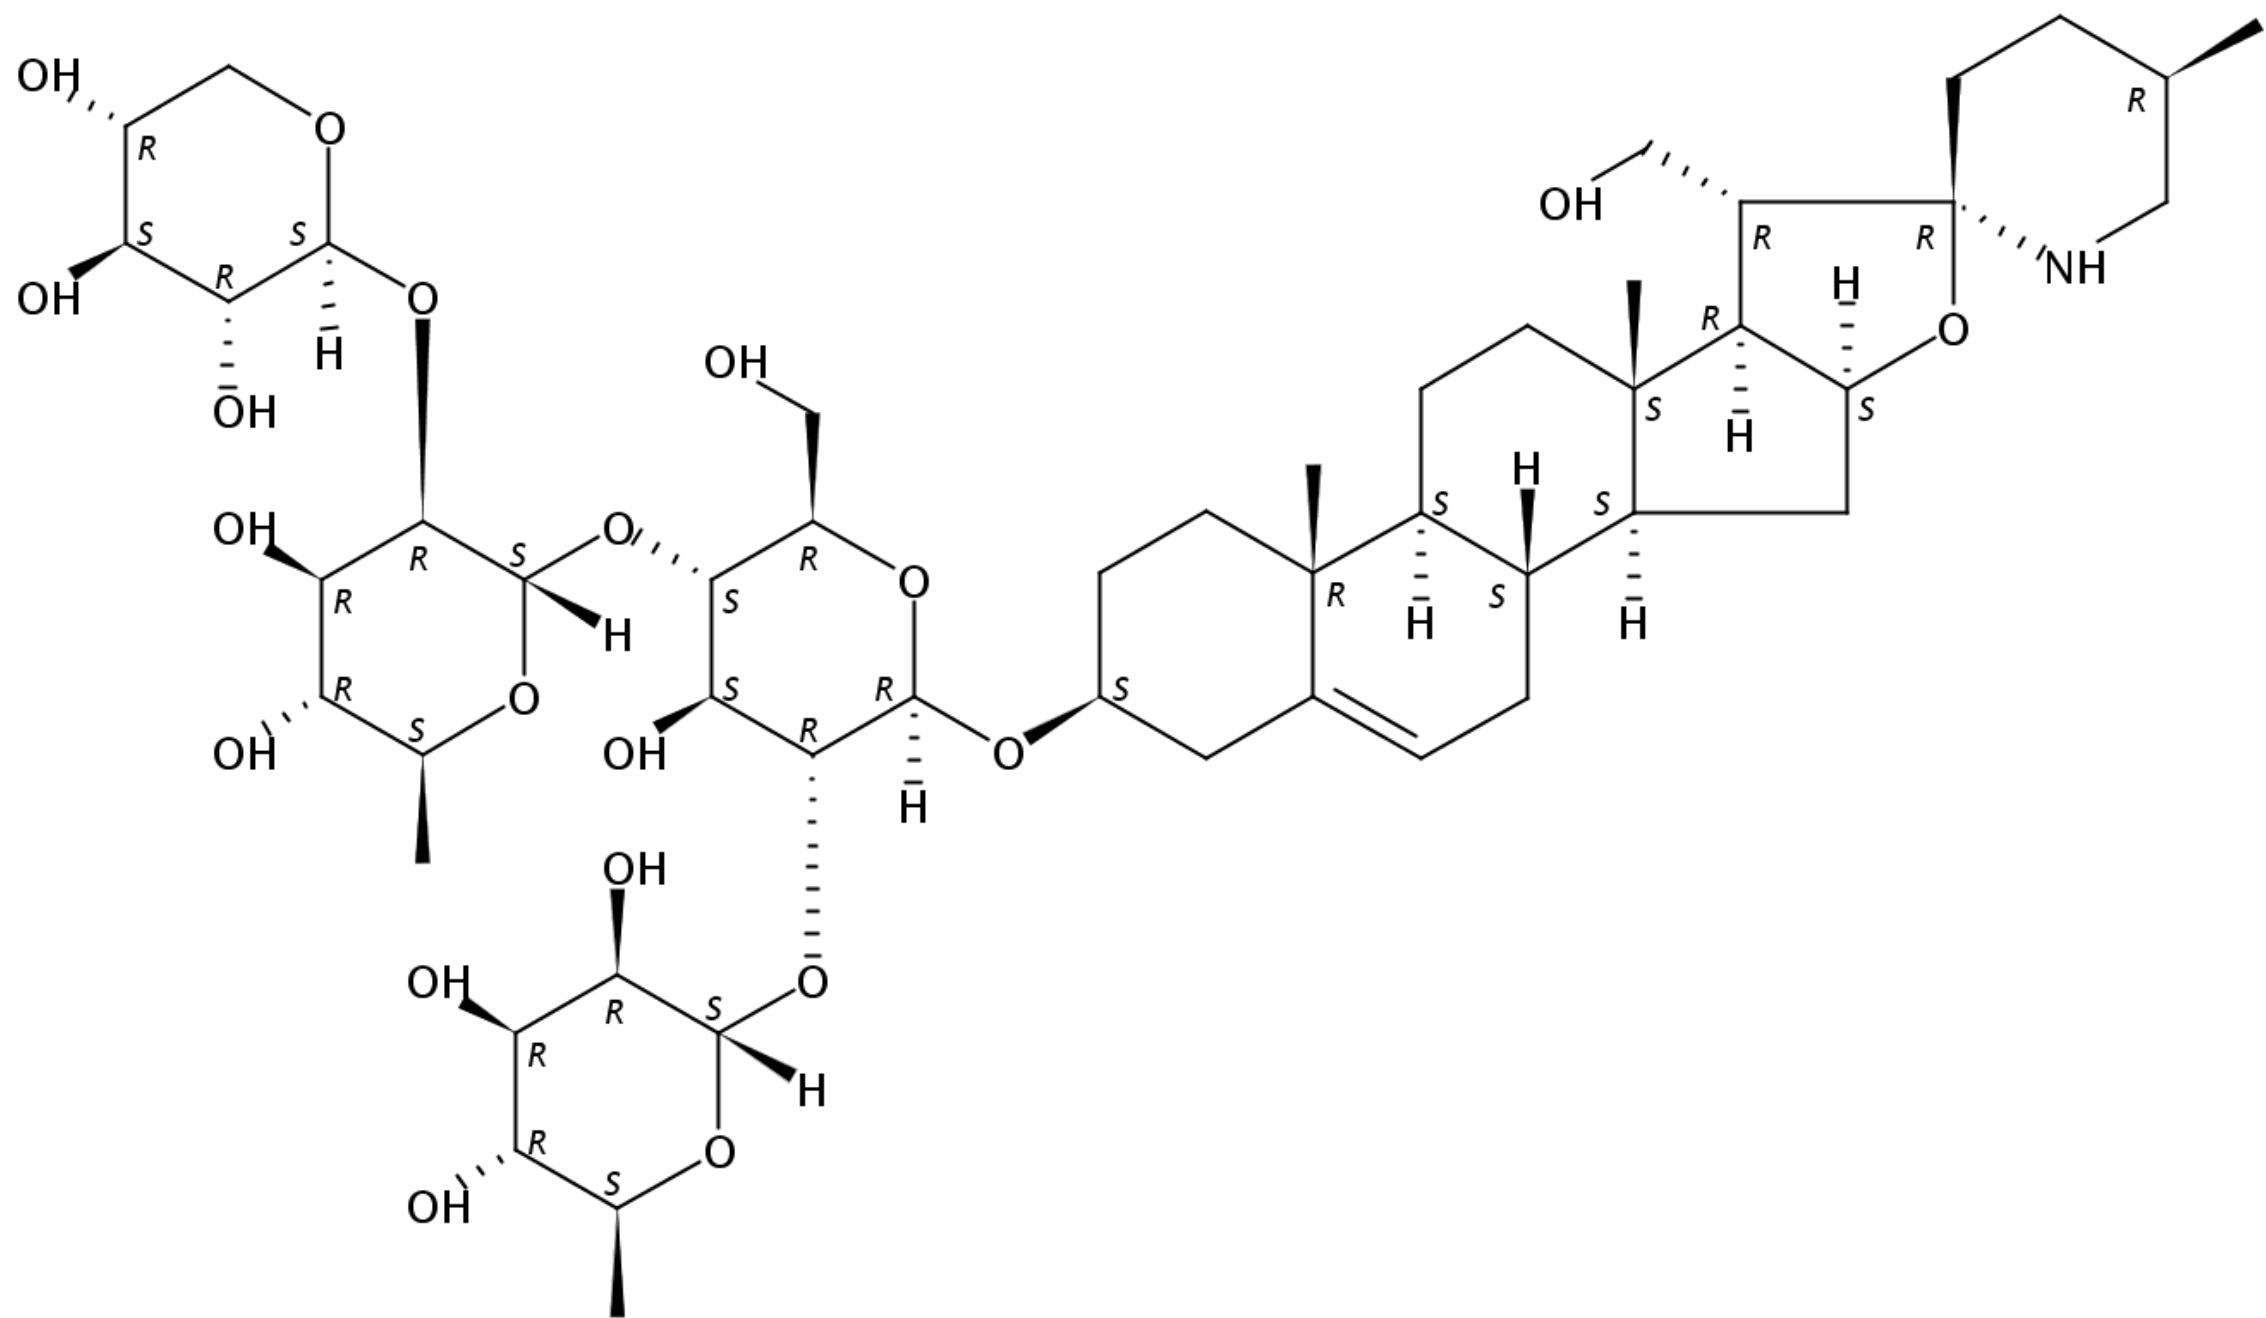

Malonyl-solamargine (**26**)

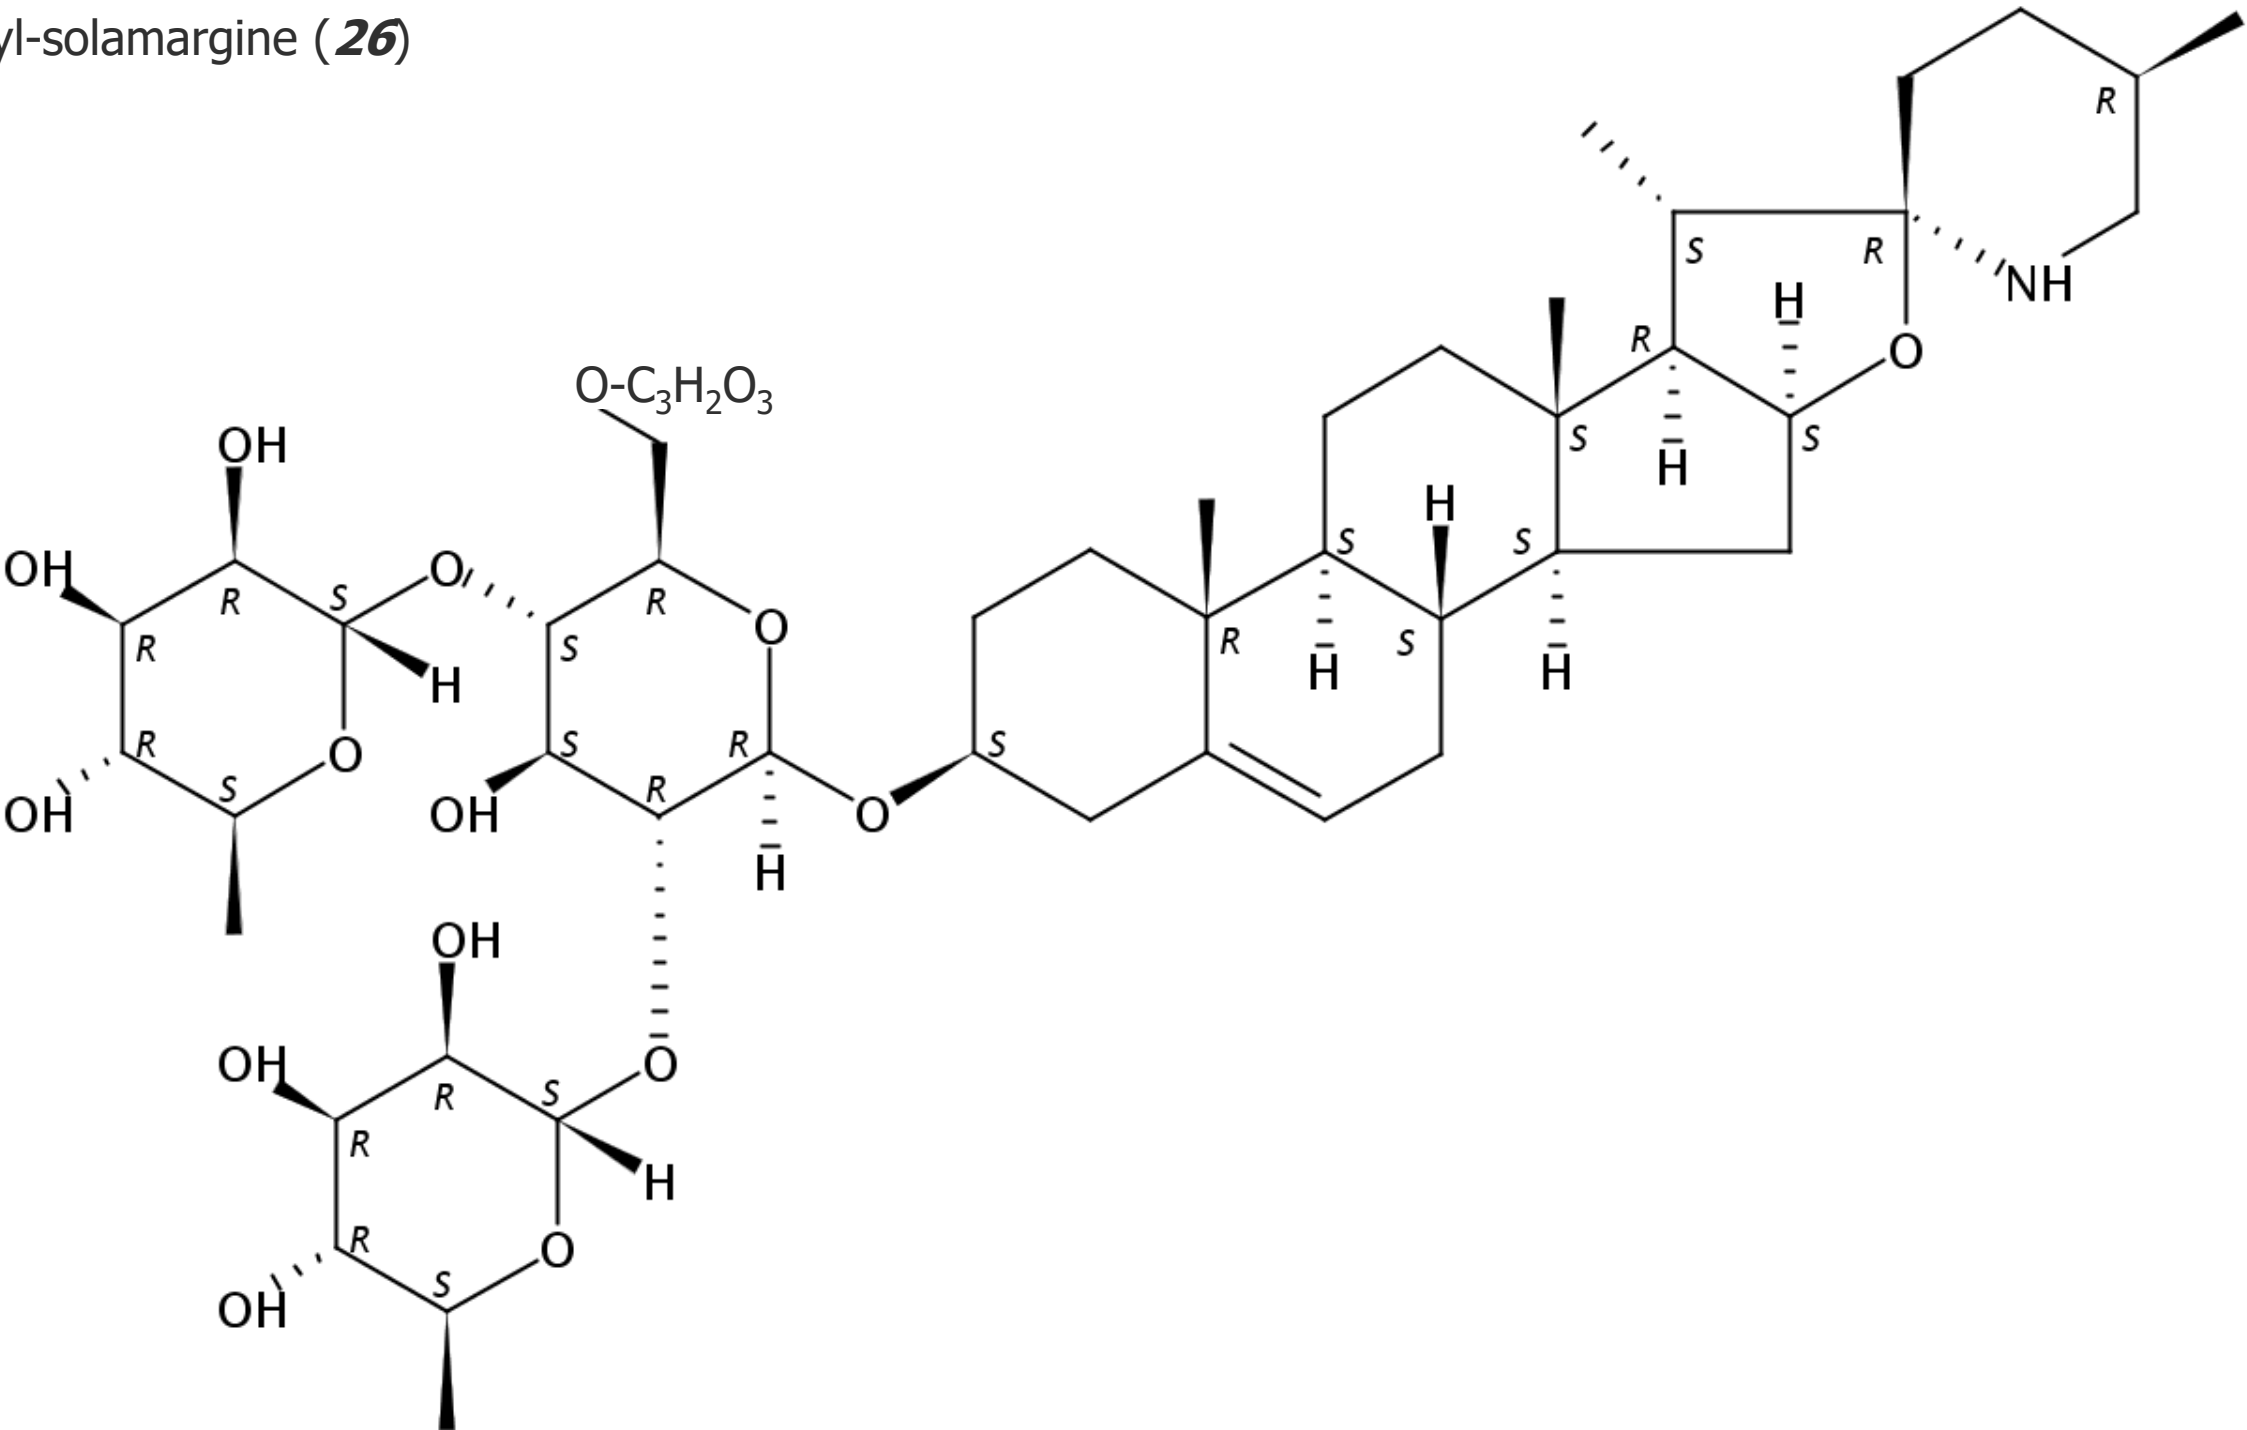

Solanigroside E (**28**)

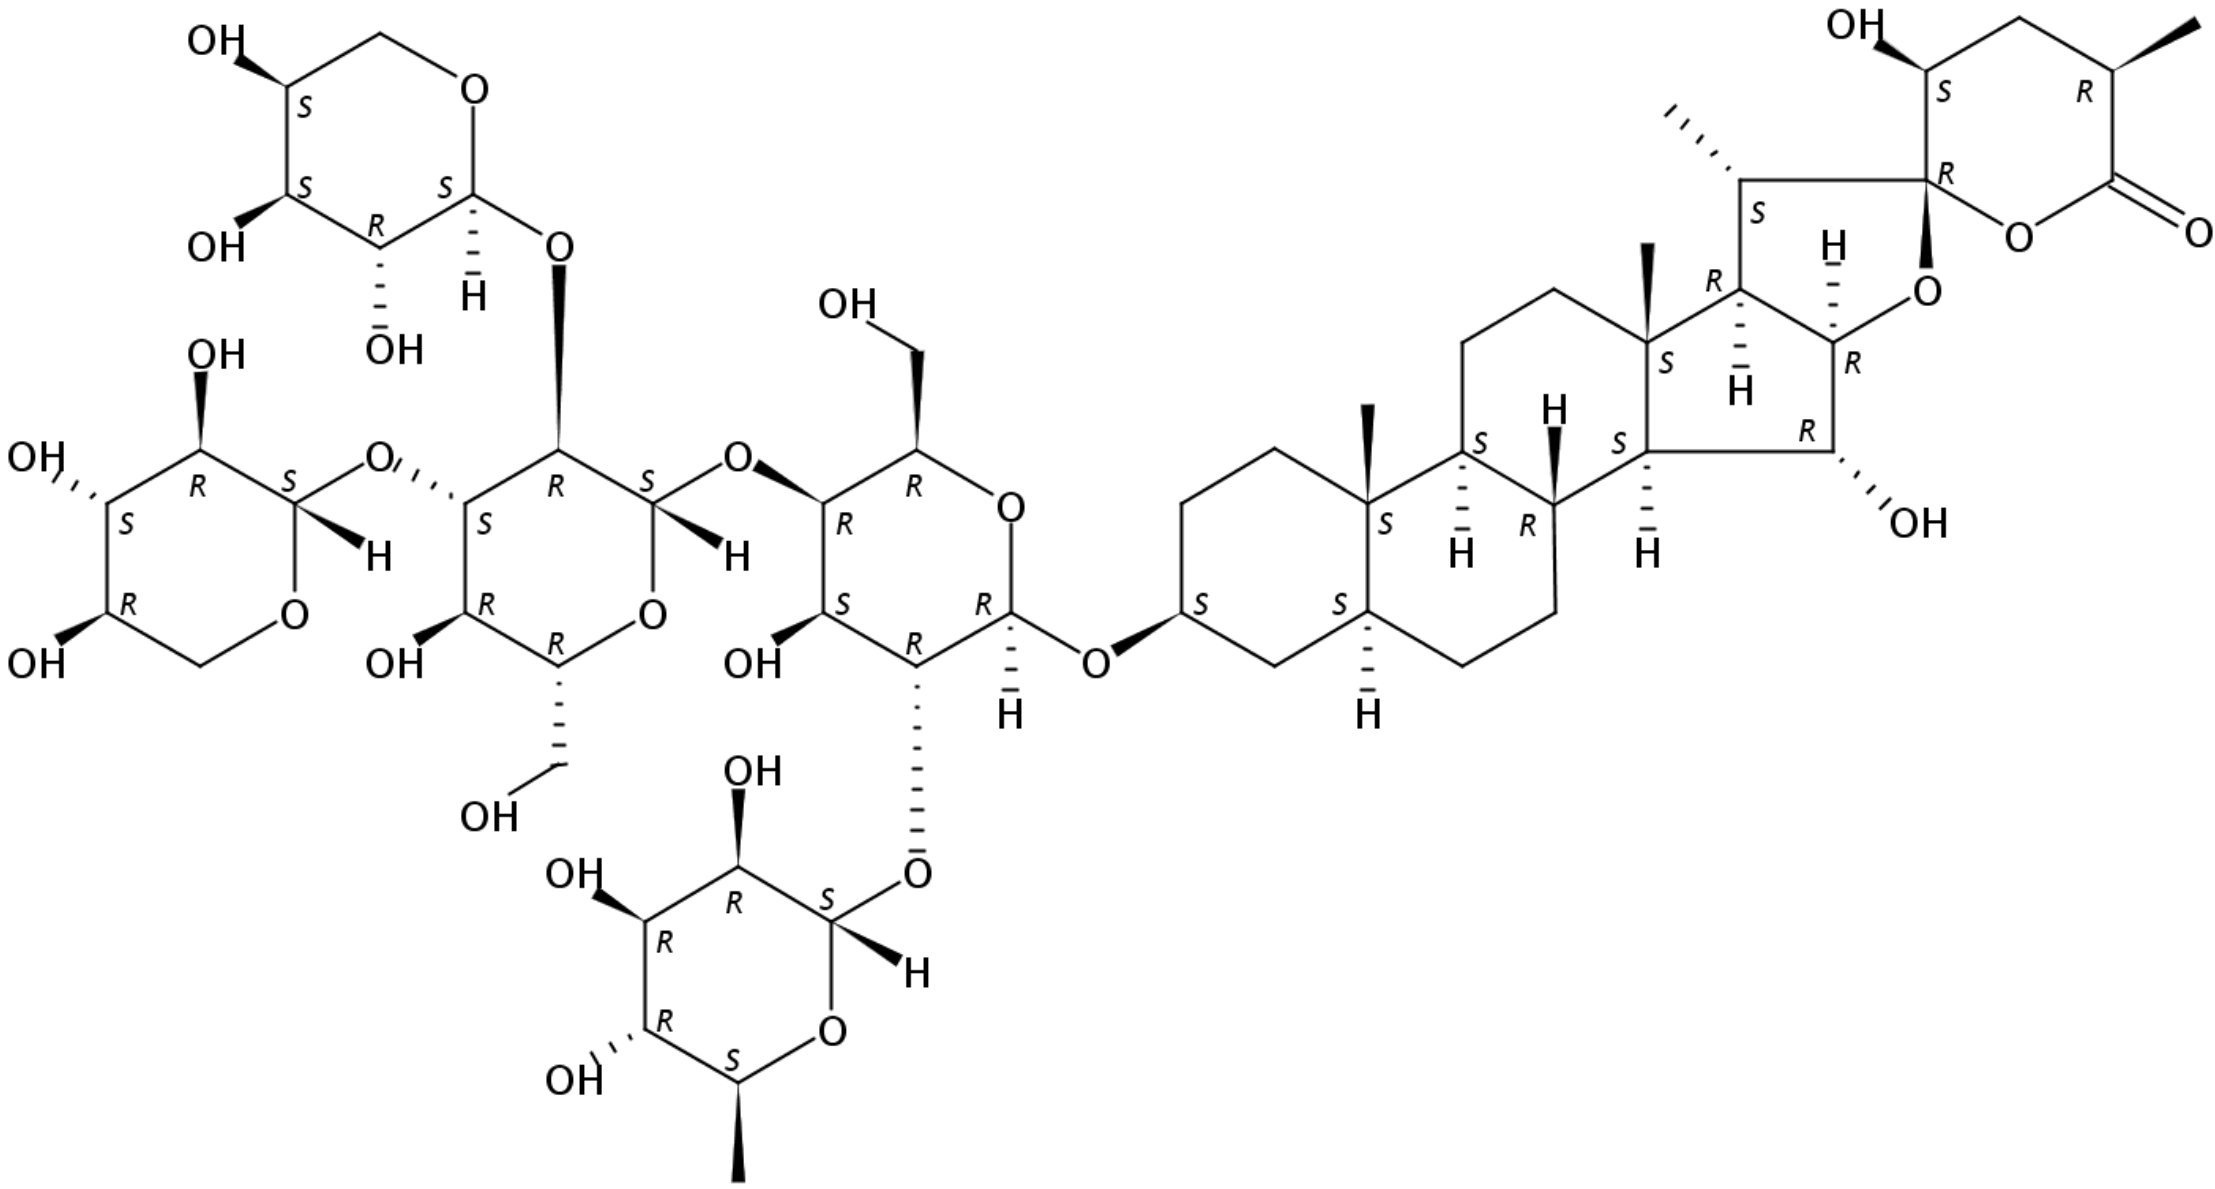

## Anguivioside XI (**35**)

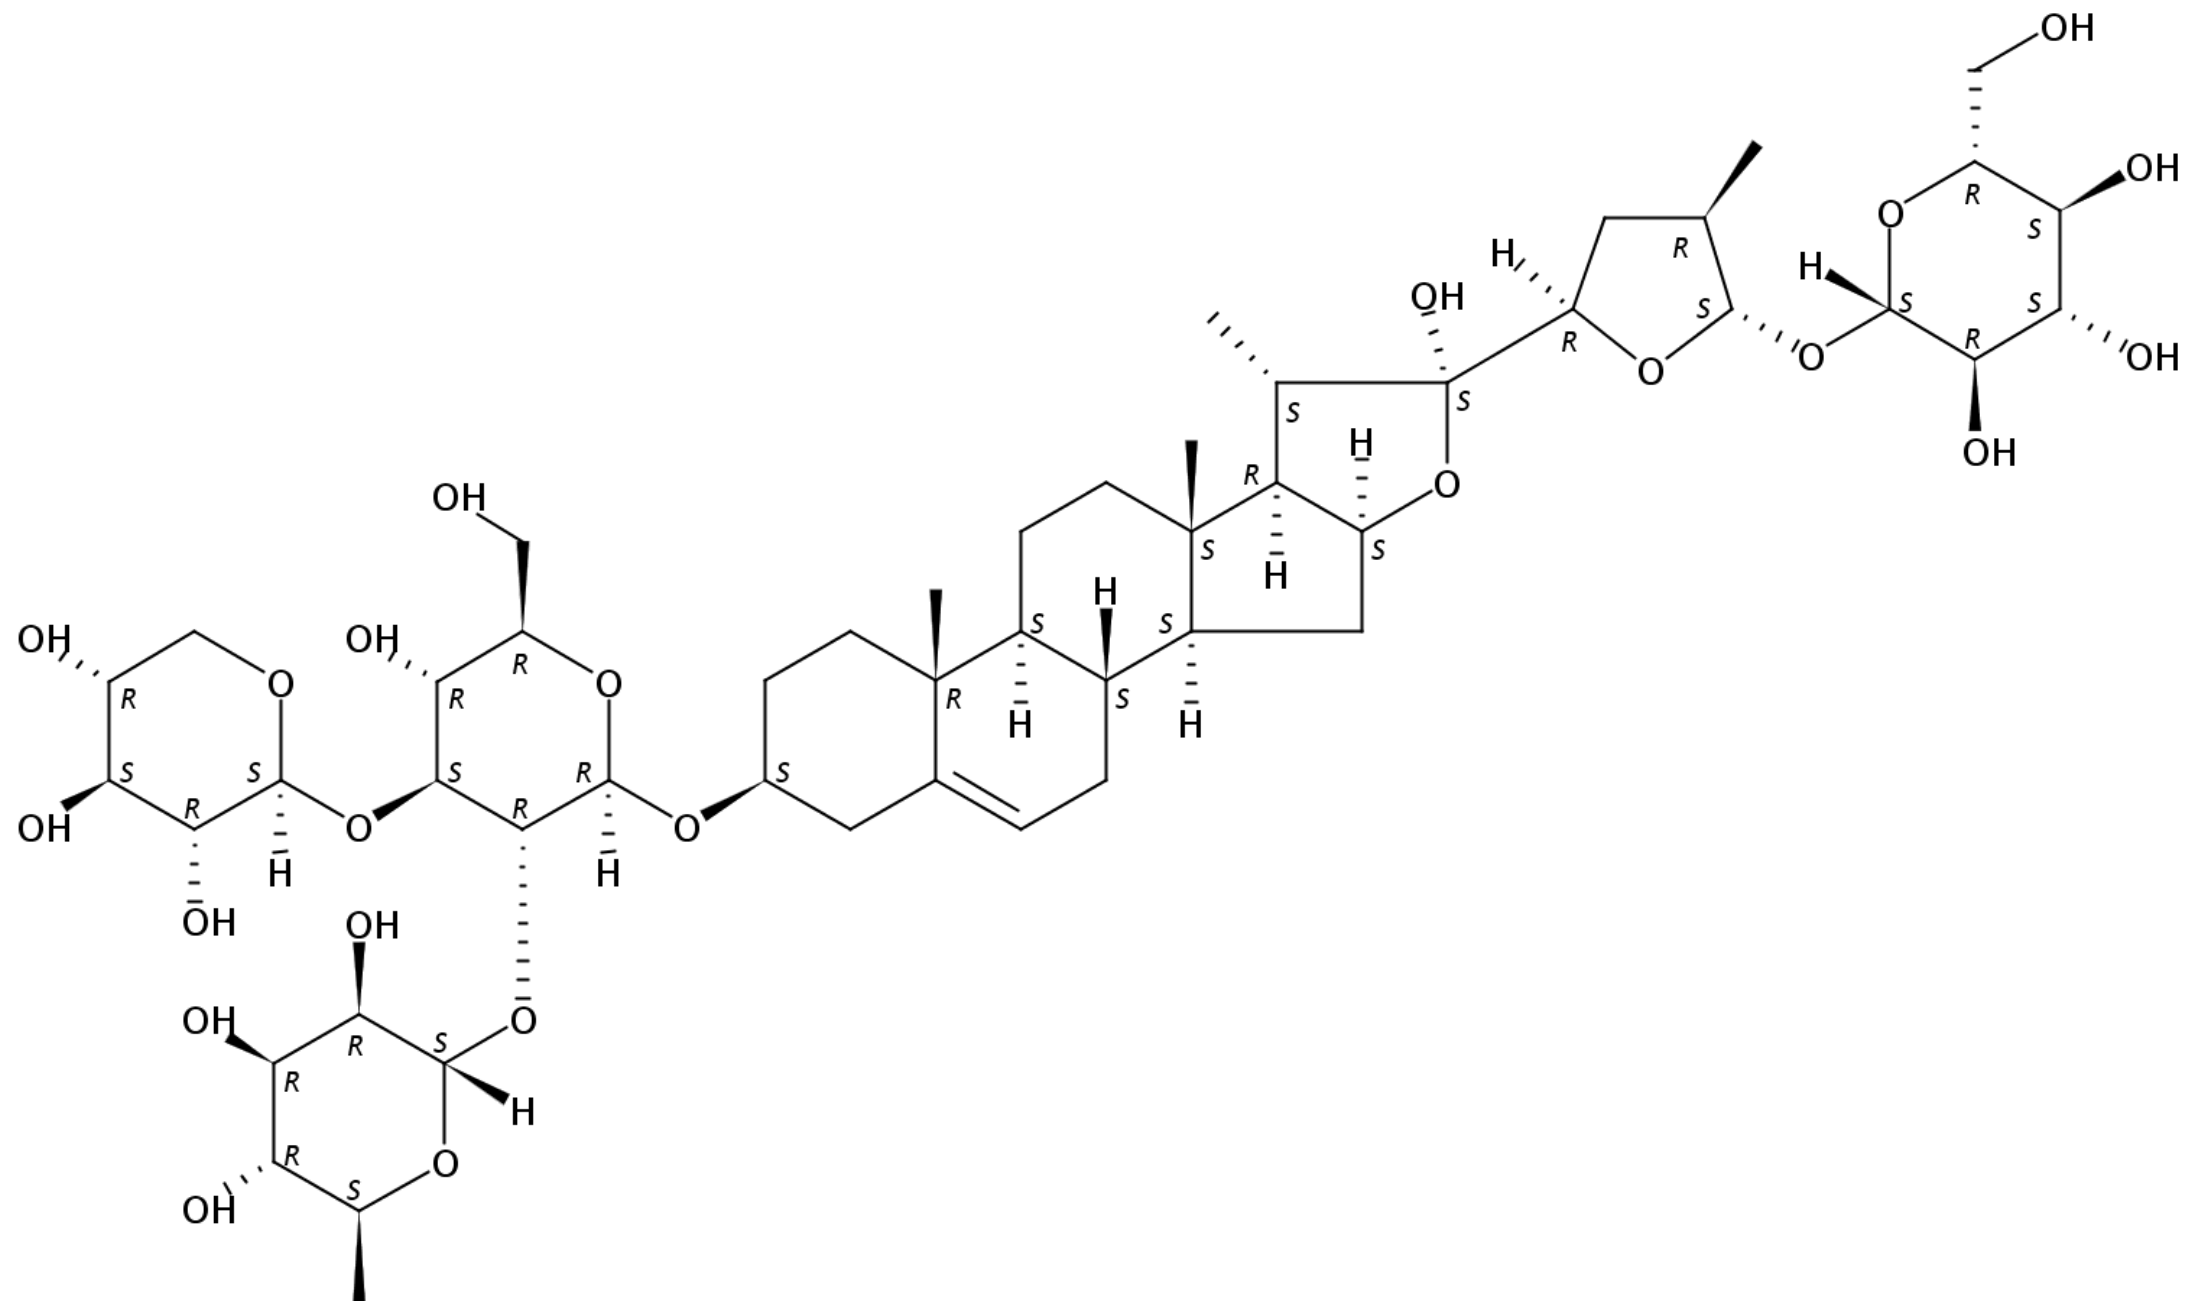

Lyconoside II (**40**)

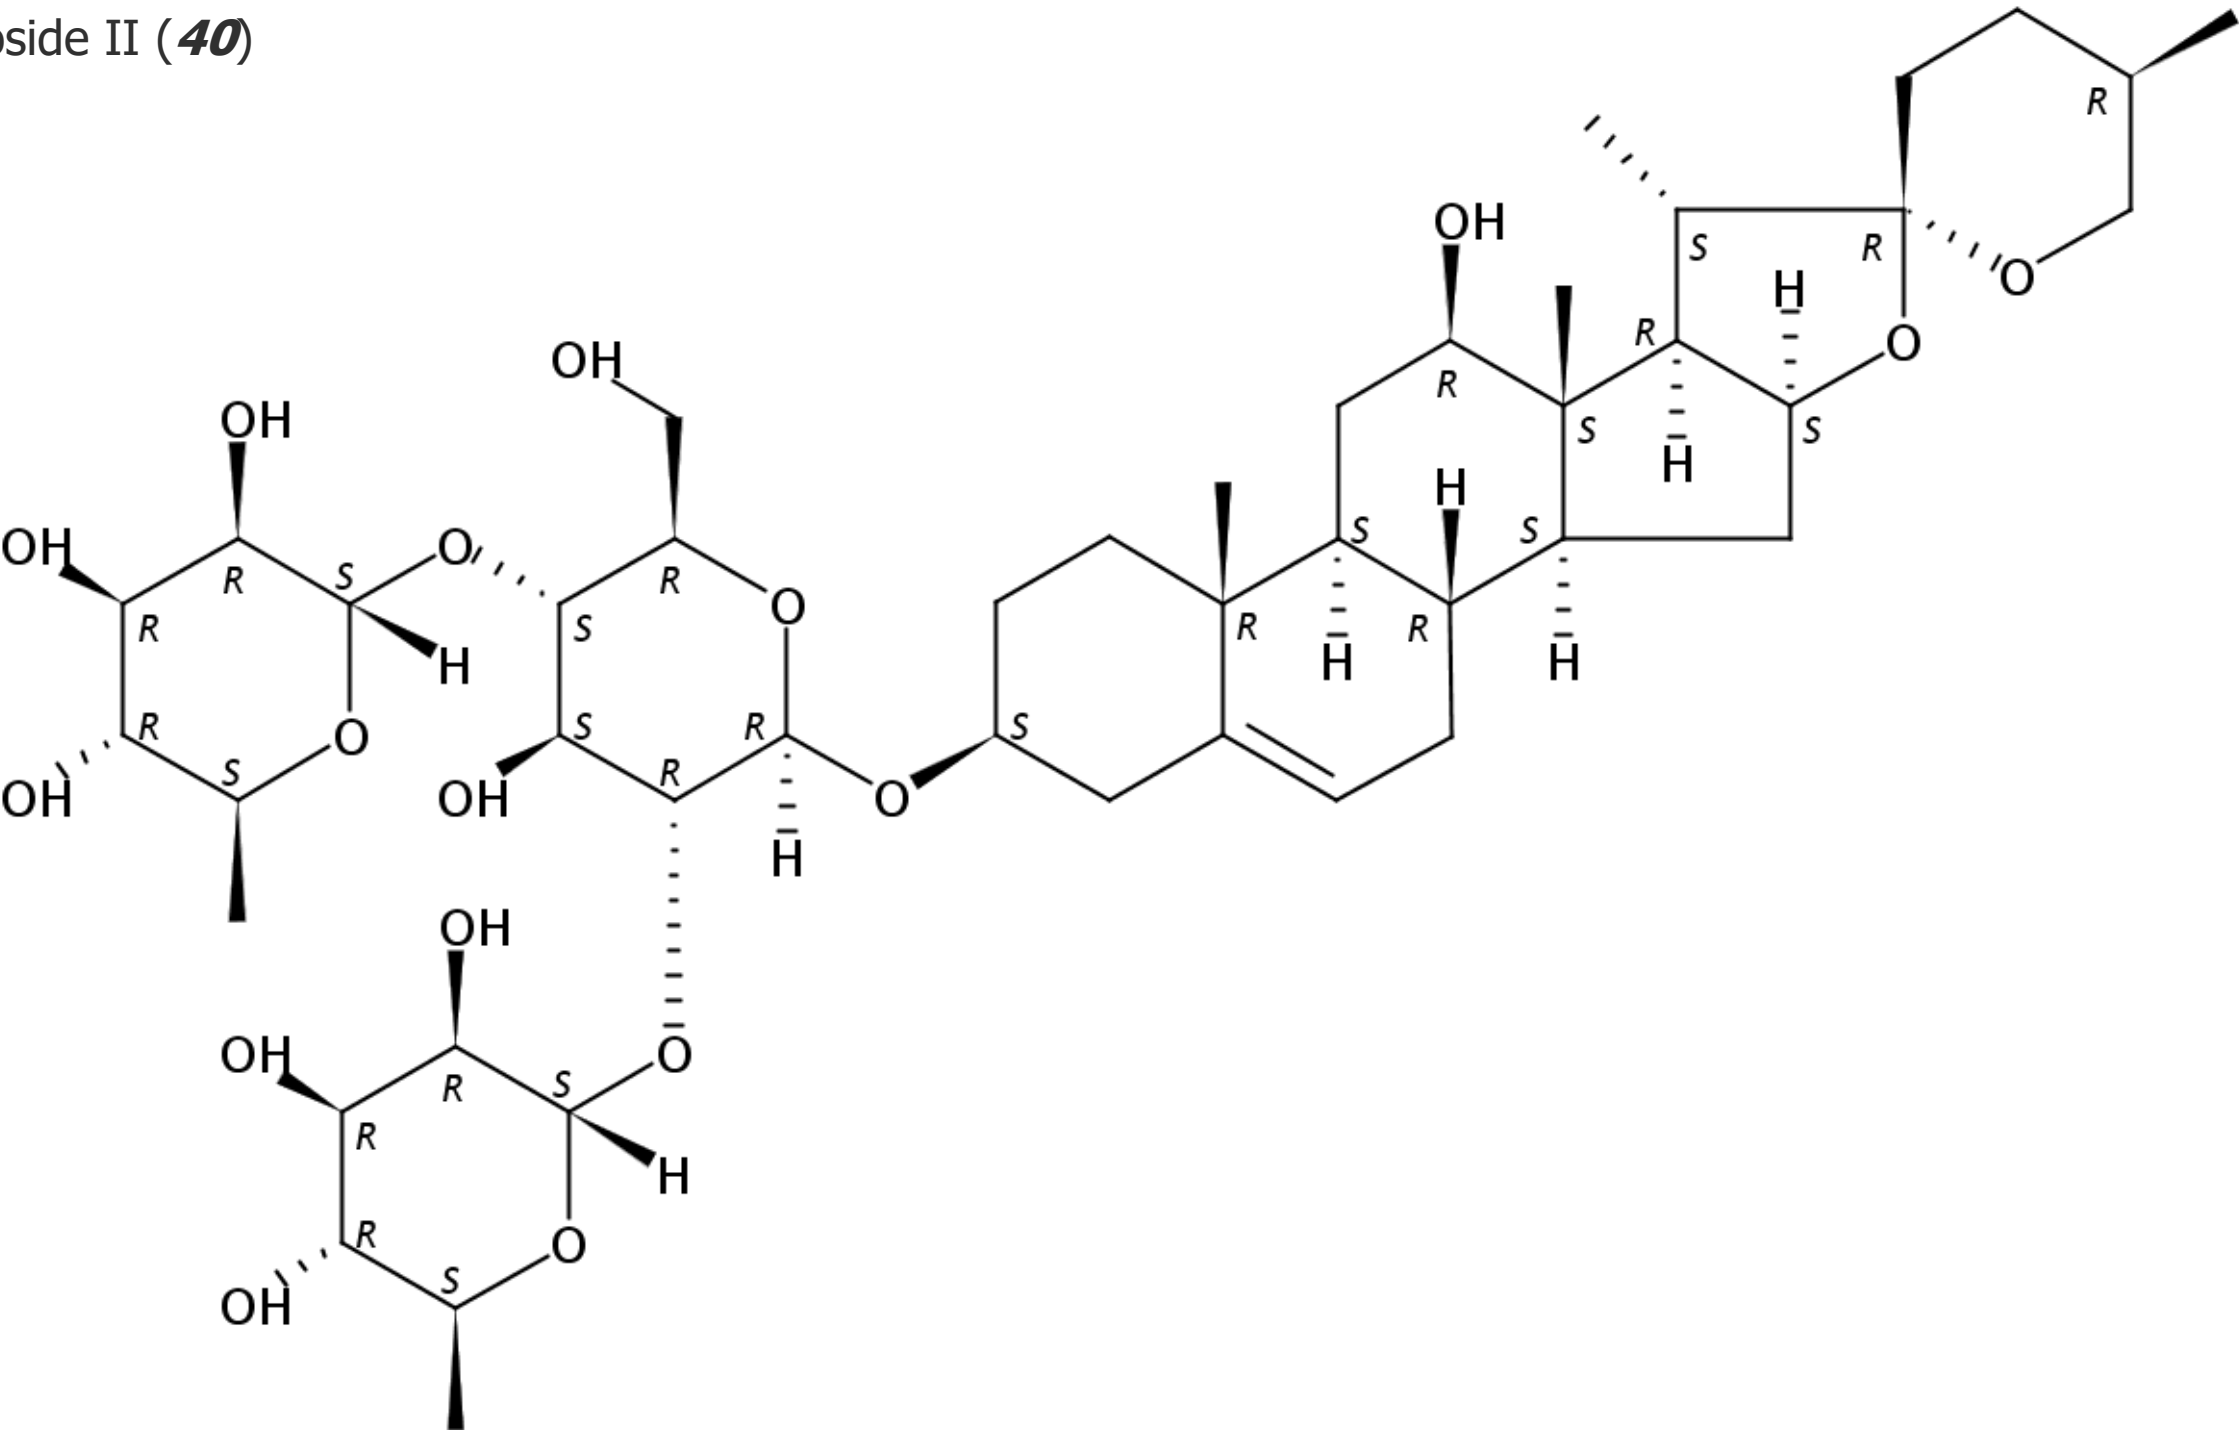



Solanigroside D (**43**)

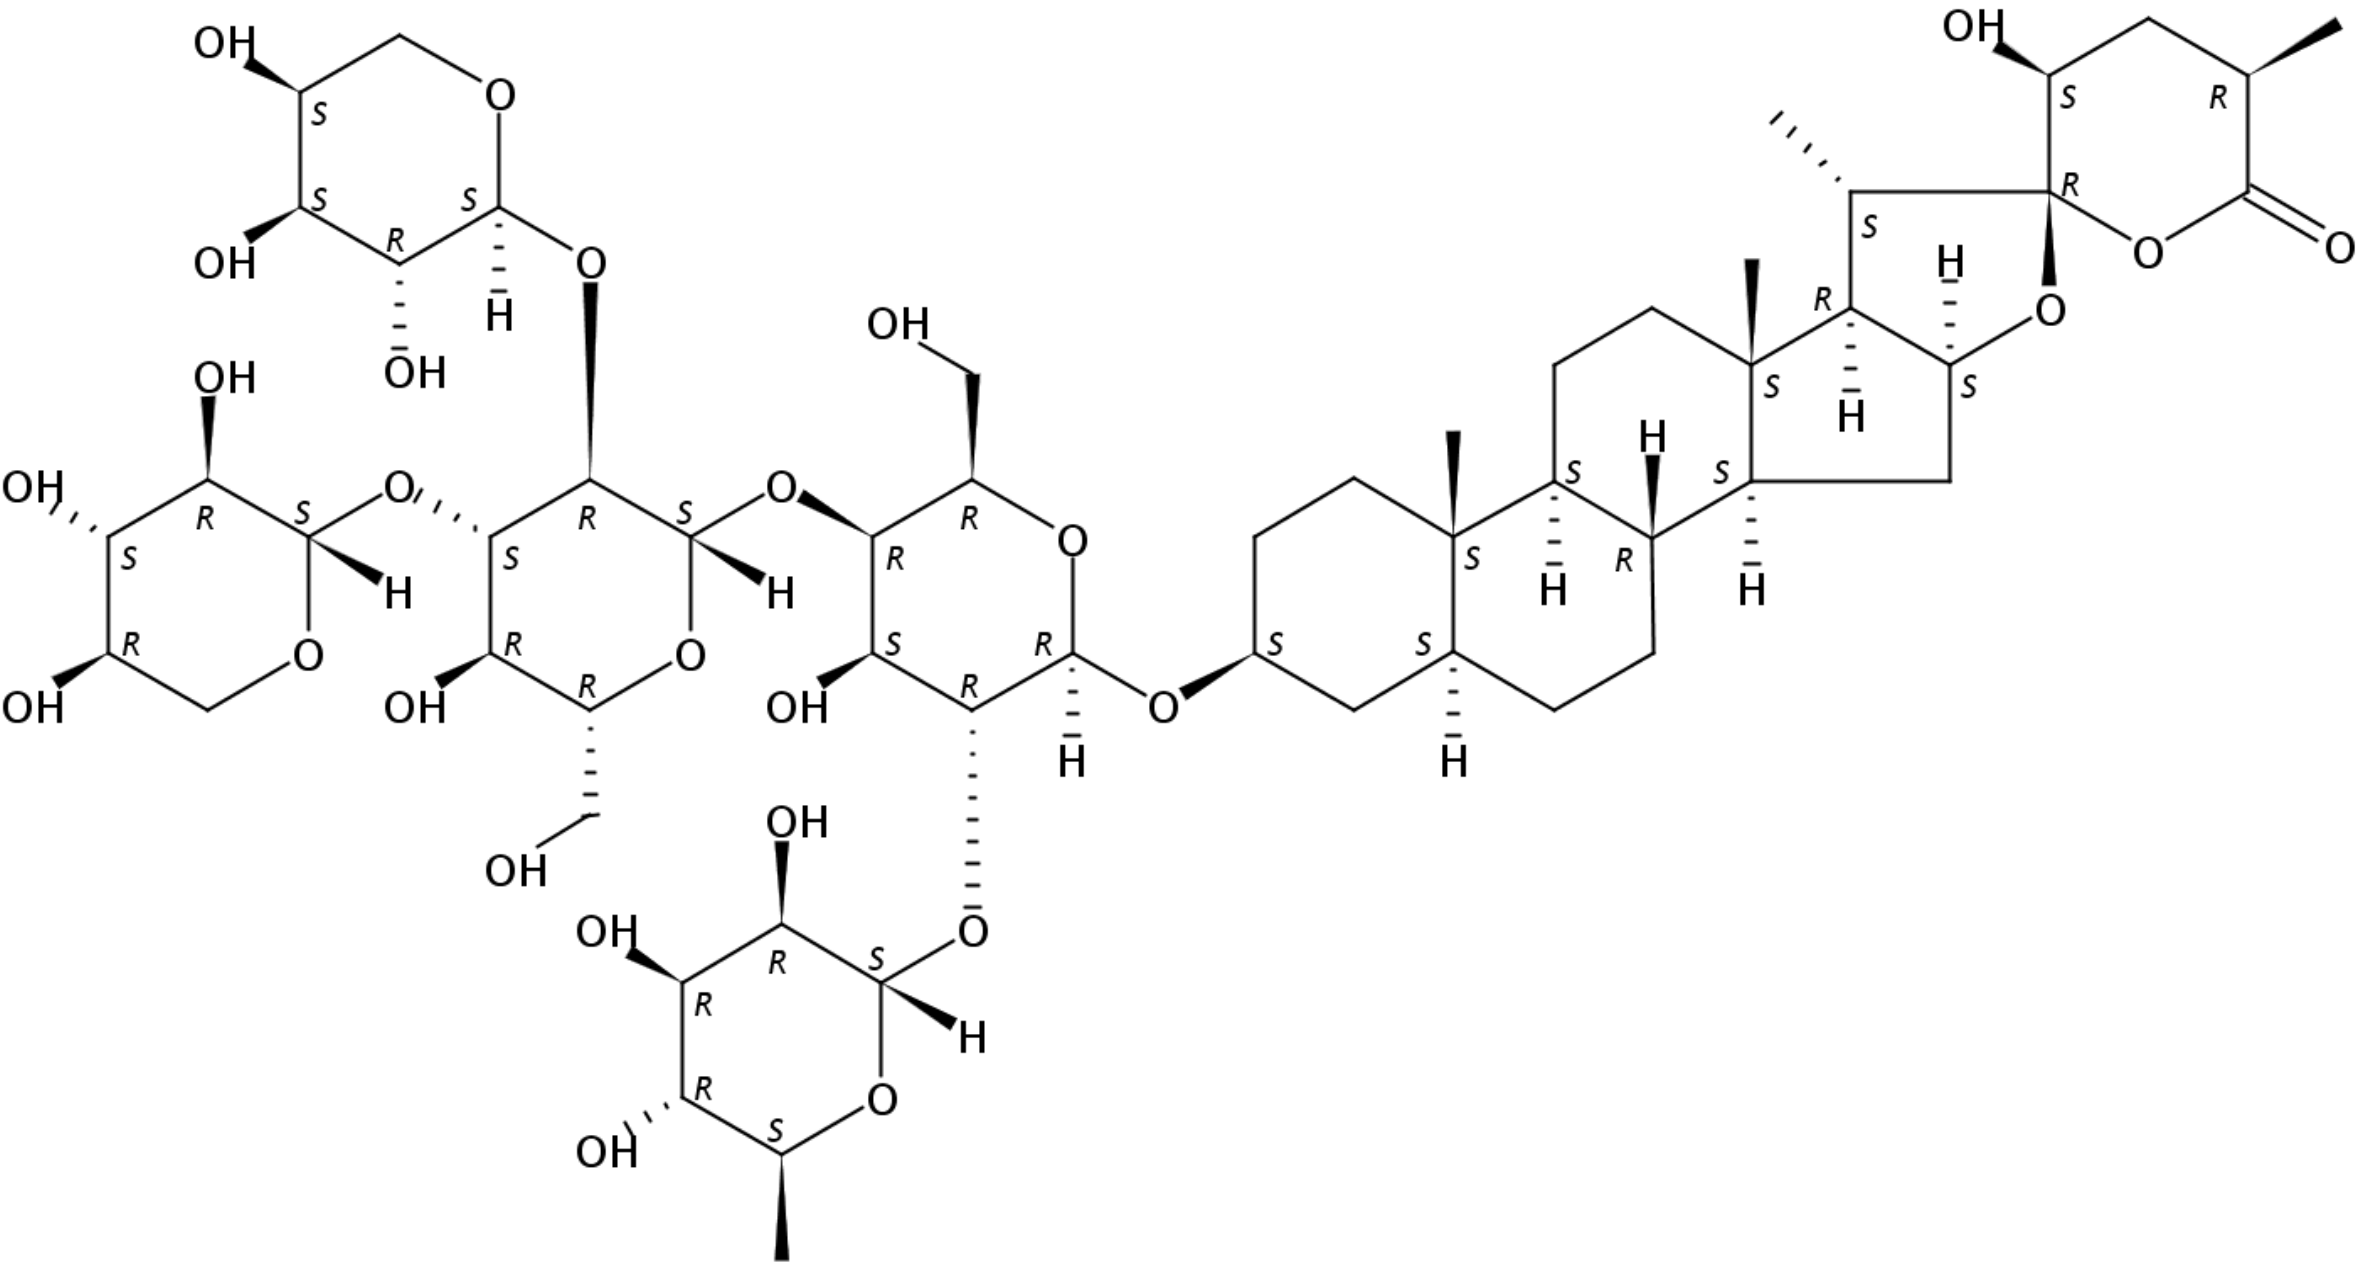

Supplement: s1 [file s1]
