# Supplementary material for: High-Performance Liquid Chromatography–Mass Spectrometry Analysis of Glycoalkaloids from Underexploited Solanum Species and Their Acetylcholinesterase Inhibition Activity
Source: MDPI journal article supplement (doi:10.3390/plants11030269), 2022-01-20
Supplement: s1 [file s1]

Tabel S1. Concentrations of individual glycoalkaloids detected in the selected *Solanum* species. Concentrations are expressed in ng g<sup>-1</sup> on dry weight basis.

| Glycoalkaloid: | <b>S. nigrum (OB)</b> |       |        | <b>S. nigrum (B)</b> |       |        | <b>S. melanocerasum</b> |       |        | <b>S. retroflexum</b> |        |        | <b>S. sisymbriifolium</b> |       |        | <b>S. quitoense</b> |       |        | <b>S. caripense</b> |        |        | <b>S. muricatum</b> |       |        |
|----------------|-----------------------|-------|--------|----------------------|-------|--------|-------------------------|-------|--------|-----------------------|--------|--------|---------------------------|-------|--------|---------------------|-------|--------|---------------------|--------|--------|---------------------|-------|--------|
|                | Roots                 | Steam | Leaves | Roots                | Steam | Leaves | Roots                   | Steam | Leaves | Roots                 | Steam  | Leaves | Roots                     | Steam | Leaves | Roots               | Steam | Leaves | Roots               | Steam  | Leaves | Roots               | Steam | Leaves |
| <b>1</b>       | 1921                  | 91    | 53     | 36                   | 4     | 1      | 11                      | 5     | 5      | 221                   | 59     | 31     | 489                       | 13846 | 37549  | 79                  | 734   | 225    | 1444                | 260    | 1512   | 31                  | 17    | 86     |
| <b>2</b>       | 764                   | 39    | 25     | 2                    | 1     | 1      | 1                       | 0     | 1      | 80                    | 20     | 10     | 33                        | 272   | 30349  | 5                   | 151   | 10     | 37                  | 949    | 2373   | 1                   | 16    | 113    |
| <b>3</b>       | 1                     | 0     | 1      | 1                    | 1     | 1      | 1                       | 1     | 1      | 1                     | 4      | 3      | 1                         | 8     | 51     | 11                  | 1     | 1      | 67                  | 94     | 17     | 2295                | 2320  | 195    |
| <b>4</b>       | 0                     | 1     | 1      | 1                    | 1     | 1      | 1                       | 1     | 1      | 2                     | 0      | 1      | 4                         | 1     | 2      | 380                 | 0     | 1      | 39                  | 3      | 5      | 18                  | 36    | 17     |
| <b>5</b>       | 44                    | 17    | 7      | 47                   | 34    | 12     | 17                      | 8     | 5      | 14                    | 7      | 6      | 3                         | 15    | 33     | 173                 | 1114  | 31     | 1378                | 12999  | 53247  | 268                 | 20    | 1582   |
| <b>6</b>       | 370                   | 30    | 25     | 22                   | 1     | 0      | 10                      | 2     | 4      | 19                    | 20     | 11     | 370                       | 15690 | 2133   | 366                 | 29    | 7      | 266                 | 675    | 6890   | 26                  | 25    | 175    |
| <b>7</b>       | 23                    | 4     | 8      | 20                   | 2     | 1      | 51                      | 28    | 11     | 90                    | 10     | 9      | 1                         | 1     | 1      | 41                  | 8     | 1      | 175                 | 29     | 46     | 66                  | 17    | 1      |
| <b>8</b>       | 53                    | 266   | 20     | 204                  | 562   | 81     | 35                      | 14    | 5      | 30                    | 11     | 58     | 41                        | 4     | 125    | 113                 | 18    | 1      | 13085               | 13008  | 84     | 2556                | 614   | 549    |
| <b>9</b>       | 37                    | 20    | 66     | 25                   | 7     | 12     | 68                      | 150   | 105    | 89                    | 87     | 50     | 1                         | 1     | 4      | 8                   | 1     | 1      | 80                  | 1      | 19     | 16                  | 3     | 1      |
| <b>10</b>      | 23                    | 18    | 34     | 8                    | 1     | 7      | 141                     | 26    | 126    | 62                    | 30     | 19     | 1                         | 28    | 18     | 15                  | 4     | 1      | 588                 | 1      | 133    | 27                  | 1     | 18     |
| <b>11</b>      | 241                   | 265   | 12     | 41                   | 57    | 81     | 9                       | 14    | 5      | 30                    | 10     | 21     | 41                        | 8     | 109    | 133                 | 18    | 1      | 12656               | 24517  | 586    | 3206                | 2256  | 551    |
| <b>12</b>      | 48                    | 4     | 121    | 19                   | 34    | 28     | 7                       | 38    | 1      | 7                     | 119    | 58     | 8                         | 12    | 11     | 31                  | 9     | 1      | 13822               | 4691   | 106    | 3865                | 377   | 131    |
| <b>13</b>      | 15                    | 24    | 120    | 19                   | 34    | 28     | 7                       | 38    | 1      | 8                     | 115    | 3      | 9                         | 15    | 11     | 37                  | 9     | 1      | 13849               | 401    | 41     | 1236                | 252   | 40     |
| <b>14</b>      | 164                   | 34    | 12     | 33                   | 52    | 10     | 8                       | 5     | 2      | 15                    | 1      | 9      | 22                        | 77    | 50     | 64089               | 3403  | 552    | 12064               | 5244   | 198    | 593                 | 662   | 82     |
| <b>15</b>      | 272940                | 17416 | 9560   | 12858                | 123   | 61     | 758                     | 70    | 54     | 19348                 | 5562   | 3910   | 393                       | 221   | 30     | 7049                | 6510  | 1975   | 11492               | 24066  | 85304  | 2342                | 2311  | 44554  |
| <b>16</b>      | 44                    | 808   | 64     | 583                  | 1257  | 200    | 214                     | 61    | 39     | 126                   | 92     | 61     | 5808                      | 29522 | 30713  | 8394                | 2654  | 202    | 165280              | 103414 | 28762  | 24937               | 40584 | 11536  |
| <b>17</b>      | 11                    | 56    | 61     | 28                   | 12    | 23     | 34                      | 76    | 9      | 35                    | 37     | 47     | 1                         | 1     | 76     | 11                  | 1     | 1      | 3347                | 62     | 1      | 113                 | 24    | 2      |
| <b>18</b>      | 8                     | 61    | 12     | 31                   | 93    | 14     | 4                       | 13    | 8      | 6                     | 16     | 4      | 131                       | 5383  | 5568   | 1419                | 452   | 37     | 23030               | 21014  | 5697   | 5329                | 1042  | 2197   |
| <b>19</b>      | 4361                  | 2241  | 36139  | 306                  | 2113  | 7003   | 733                     | 2039  | 285    | 1937                  | 7475   | 4799   | 9                         | 1     | 3      | 0                   | 1     | 1      | 3                   | 1      | 1      | 1                   | 1     | 1      |
| <b>20</b>      | 132316                | 22317 | 132675 | 28133                | 11752 | 10543  | 20850                   | 11992 | 5821   | 25950                 | 79084  | 53586  | 3                         | 6     | 9      | 49                  | 3     | 6      | 25                  | 1      | 1      | 9                   | 16    | 7      |
| <b>21</b>      | 53                    | 1     | 38     | 2                    | 0     | 8      | 1                       | 2     | 16     | 43                    | 6      | 5      | 918                       | 10683 | 4516   | 15149               | 4957  | 152    | 23317               | 12     | 34     | 34                  | 12    | 15     |
| <b>22</b>      | 363                   | 628   | 1898   | 35                   | 306   | 702    | 12                      | 138   | 396    | 481                   | 2054   | 1045   | 12                        | 3     | 4      | 30                  | 1     | 1      | 23                  | 1      | 33     | 328                 | 42    | 1      |
| <b>23</b>      | 15                    | 6     | 21     | 5                    | 3     | 9      | 2                       | 4     | 0      | 3                     | 7      | 1      | 22                        | 22    | 7      | 41491               | 3647  | 239    | 734                 | 1      | 21     | 7                   | 18    | 85     |
| <b>24</b>      | 3733                  | 1283  | 11569  | 158                  | 820   | 4350   | 43                      | 1170  | 7904   | 1425                  | 5348   | 21346  | 1                         | 1     | 6      | 209                 | 28    | 1      | 27                  | 11     | 14     | 33                  | 1     | 11     |
| <b>25</b>      | 255                   | 39    | 954    | 33                   | 149   | 103    | 68058                   | 54865 | 6970   | 142                   | 622    | 318    | 16                        | 19    | 13     | 214                 | 42    | 28     | 31                  | 18     | 41     | 55                  | 103   | 121    |
| <b>26</b>      | 320583                | 18907 | 8214   | 1556                 | 577   | 179    | 1793                    | 103   | 70     | 24287                 | 5136   | 3190   | 305                       | 4899  | 139563 | 12289               | 20292 | 2309   | 14817               | 124445 | 562994 | 5591                | 11078 | 182798 |
| <b>27</b>      | 943                   | 1208  | 14576  | 1577                 | 643   | 2810   | 1077                    | 1025  | 1908   | 8525                  | 5658   | 3840   | 1                         | 1     | 21     | 36                  | 1     | 1      | 88                  | 3      | 9      | 370                 | 38    | 2      |
| <b>28</b>      | 111252                | 87378 | 364962 | 6034                 | 27179 | 57636  | 4403                    | 31179 | 54252  | 52101                 | 163719 | 287474 | 5                         | 9     | 41     | 77                  | 14    | 21     | 22                  | 5      | 14     | 23                  | 12    | 17     |
| <b>29</b>      | 2669                  | 1612  | 2057   | 861                  | 456   | 177    | 22                      | 325   | 87     | 427                   | 1835   | 1156   | 131                       | 10658 | 8092   | 2277                | 4730  | 106    | 80                  | 82     | 63     | 1                   | 12    | 6      |
| <b>30</b>      | 9578                  | 484   | 3110   | 598                  | 48    | 78     | 616                     | 321   | 27     | 2899                  | 225    | 321    | 1                         | 1     | 1      | 1                   | 1     | 1      | 1                   | 1      | 1      | 1                   | 1     | 1      |
| <b>31</b>      | 165                   | 115   | 173    | 42                   | 42    | 8      | 225                     | 569   | 25     | 141                   | 130    | 73     | 259                       | 25    | 8      | 24218               | 2001  | 133    | 9596                | 516    | 52     | 131                 | 57    | 55     |
| <b>32</b>      | 1572                  | 70    | 132    | 24                   | 139   | 59     | 472                     | 2957  | 65     | 1264                  | 523    | 281    | 2289                      | 13025 | 13911  | 27916               | 181   | 68     | 2535                | 3220   | 6092   | 2135                | 33    | 173    |
| <b>33</b>      | 81                    | 63    | 214    | 43                   | 17    | 24     | 184                     | 210   | 21     | 64                    | 84     | 35     | 13                        | 16    | 17     | 32                  | 1     | 1      | 30                  | 13     | 31     | 35                  | 9     | 2      |
| <b>34</b>      | 2645                  | 1001  | 1818   | 683                  | 252   | 98     | 1                       | 282   | 69     | 5085                  | 1216   | 891    | 1                         | 8     | 18     | 27                  | 1     | 1      | 8                   | 23     | 44     | 500                 | 0     | 2      |
| <b>35</b>      | 1010                  | 536   | 3527   | 325                  | 150   | 46     | 1633                    | 2280  | 31     | 602                   | 800    | 279    | 49                        | 9     | 13     | 103                 | 162   | 12     | 1976                | 113    | 8      | 75                  | 31    | 16     |
| <b>36</b>      | 447                   | 36    | 265    | 218                  | 207   | 148    | 100                     | 2275  | 86     | 899                   | 1142   | 658    | 393                       | 2341  | 2397   | 5241                | 36    | 15     | 552                 | 519    | 1082   | 393                 | 8     | 35     |
| <b>37</b>      | 49                    | 41    | 181    | 24                   | 16    | 16     | 118                     | 145   | 12     | 39                    | 69     | 54     | 7                         | 7     | 11     | 1                   | 62    | 1      | 29                  | 7      | 1197   | 300                 | 47    | 2      |
| <b>38</b>      | 4109                  | 444   | 5023   | 1590                 | 86    | 103    | 4024                    | 608   | 5      | 9243                  | 35     | 22     | 1                         | 1     | 1      | 7                   | 1     | 1      | 1                   | 1      | 1      | 1                   | 4     | 1      |
| <b>39</b>      | 309384                | 18519 | 8132   | 1573                 | 38    | 179    | 1805                    | 32    | 69     | 23847                 | 5104   | 3172   | 304                       | 4760  | 170    | 12182               | 19771 | 2286   | 4903                | 119755 | 2485   | 323                 | 4307  | 1206   |
| <b>40</b>      | 238                   | 60    | 182    | 156                  | 23    | 8      | 315                     | 282   | 14     | 857                   | 59     | 21     | 195                       | 644   | 379    | 837                 | 2256  | 62     | 2909                | 124    | 414    | 328                 | 83    | 6      |
| <b>41</b>      | 919                   | 28    | 11     | 29                   | 23    | 2      | 19                      | 2     | 1      | 231                   | 169    | 8      | 35                        | 85    | 3173   | 10894               | 83    | 57     | 1                   | 108    | 669    | 25                  | 21    | 1218   |
| <b>42</b>      | 1159                  | 39    | 54     | 20                   | 69    | 35     | 8                       | 2940  | 29     | 622                   | 40     | 21     | 18                        | 321   | 20410  | 17                  | 4     | 1      | 1                   | 54     | 113    | 30                  | 3     | 6      |
| <b>43</b>      | 1284                  | 448   | 3247   | 515                  | 174   | 56     | 375                     | 370   | 34     | 1295                  | 547    | 90     | 1                         | 6     | 13     | 25                  | 1     | 1      | 1                   | 1      | 5      | 1                   | 1     | 1      |
| <b>44</b>      | 20                    | 3     | 17     | 17                   | 131   | 35     | 50                      | 2     | 1      | 60                    | 452    | 6      | 1                         | 1     | 1      | 0                   | 1     | 1      | 1                   | 1      | 1      | 1                   | 1     | 1      |
| <b>45</b>      | 20                    | 69    | 407    | 44                   | 46    | 3      | 164                     | 390   | 10     | 189                   | 44     | 248    | 109                       | 1     | 235    | 33819               | 29    | 63     | 8                   | 194    | 681    | 30                  | 9     | 4      |
| <b>46</b>      | 122994                | 34439 | 113094 | 14012                | 2048  | 2320   | 17724                   | 6436  | 220    | 79095                 | 11602  | 13597  | 1                         | 8     | 3      | 71                  | 2     | 4      | 1                   | 1      | 1      | 13                  | 25    | 5      |
| <b>47</b>      | 139219                | 31829 | 121888 | 11907                | 1566  | 1400   | 15173                   | 6436  | 220    | 67530                 | 8628   | 10214  | 2                         | 8     | 3      | 71                  | 2     | 4      | 1                   | 1      | 1      | 13                  | 25    | 5      |
| <b>48</b>      | 4                     | 1     | 2      | 3                    | 0     | 1      | 1                       | 1     | 1      | 16                    | 5      | 7      | 24                        | 1     | 118    | 19866               | 52    | 62     | 1                   | 29     | 29     | 34                  | 85    | 9      |
| <b>49</b>      | 3                     | 4     | 60     | 47                   | 21    | 12     | 11                      | 1     | 1      | 163                   | 23     | 6      | 1865                      | 31    | 1      | 11                  | 1     | 1      | 18                  | 7      | 1      | 8                   | 1     | 1      |
| <b>50</b>      | 5                     | 5     | 36     | 0                    | 9     | 17     | 1                       | 0     | 1      | 2                     | 10     | 9      | 4020                      | 19    | 18     | 5                   | 1     | 1      | 76                  | 11     | 75     | 2                   | 1     | 1      |
| <b>51</b>      | 161                   | 34270 | 98267  | 61                   | 243   | 621    | 1                       | 9     | 1      | 378                   | 3297   | 3913   | 1                         | 1     | 1      | 1                   | 1     | 1      | 10                  | 1      | 1      | 1                   | 1     | 1      |
