# Supplementary material for: High-Performance Liquid Chromatography–Mass Spectrometry Analysis of Glycoalkaloids from Underexploited Solanum Species and Their Acetylcholinesterase Inhibition Activity
Source: MDPI journal article supplement (doi:10.3390/plants11030269), 2022-01-20

Figure S1. Total ion chromatograms of methanolic extract from the selected *Solanum* species analyzed by HPLC TOF MS. Peak numbers correspond to glycoalkaloid compounds identified in Table 1.

*Solanum muricatum*

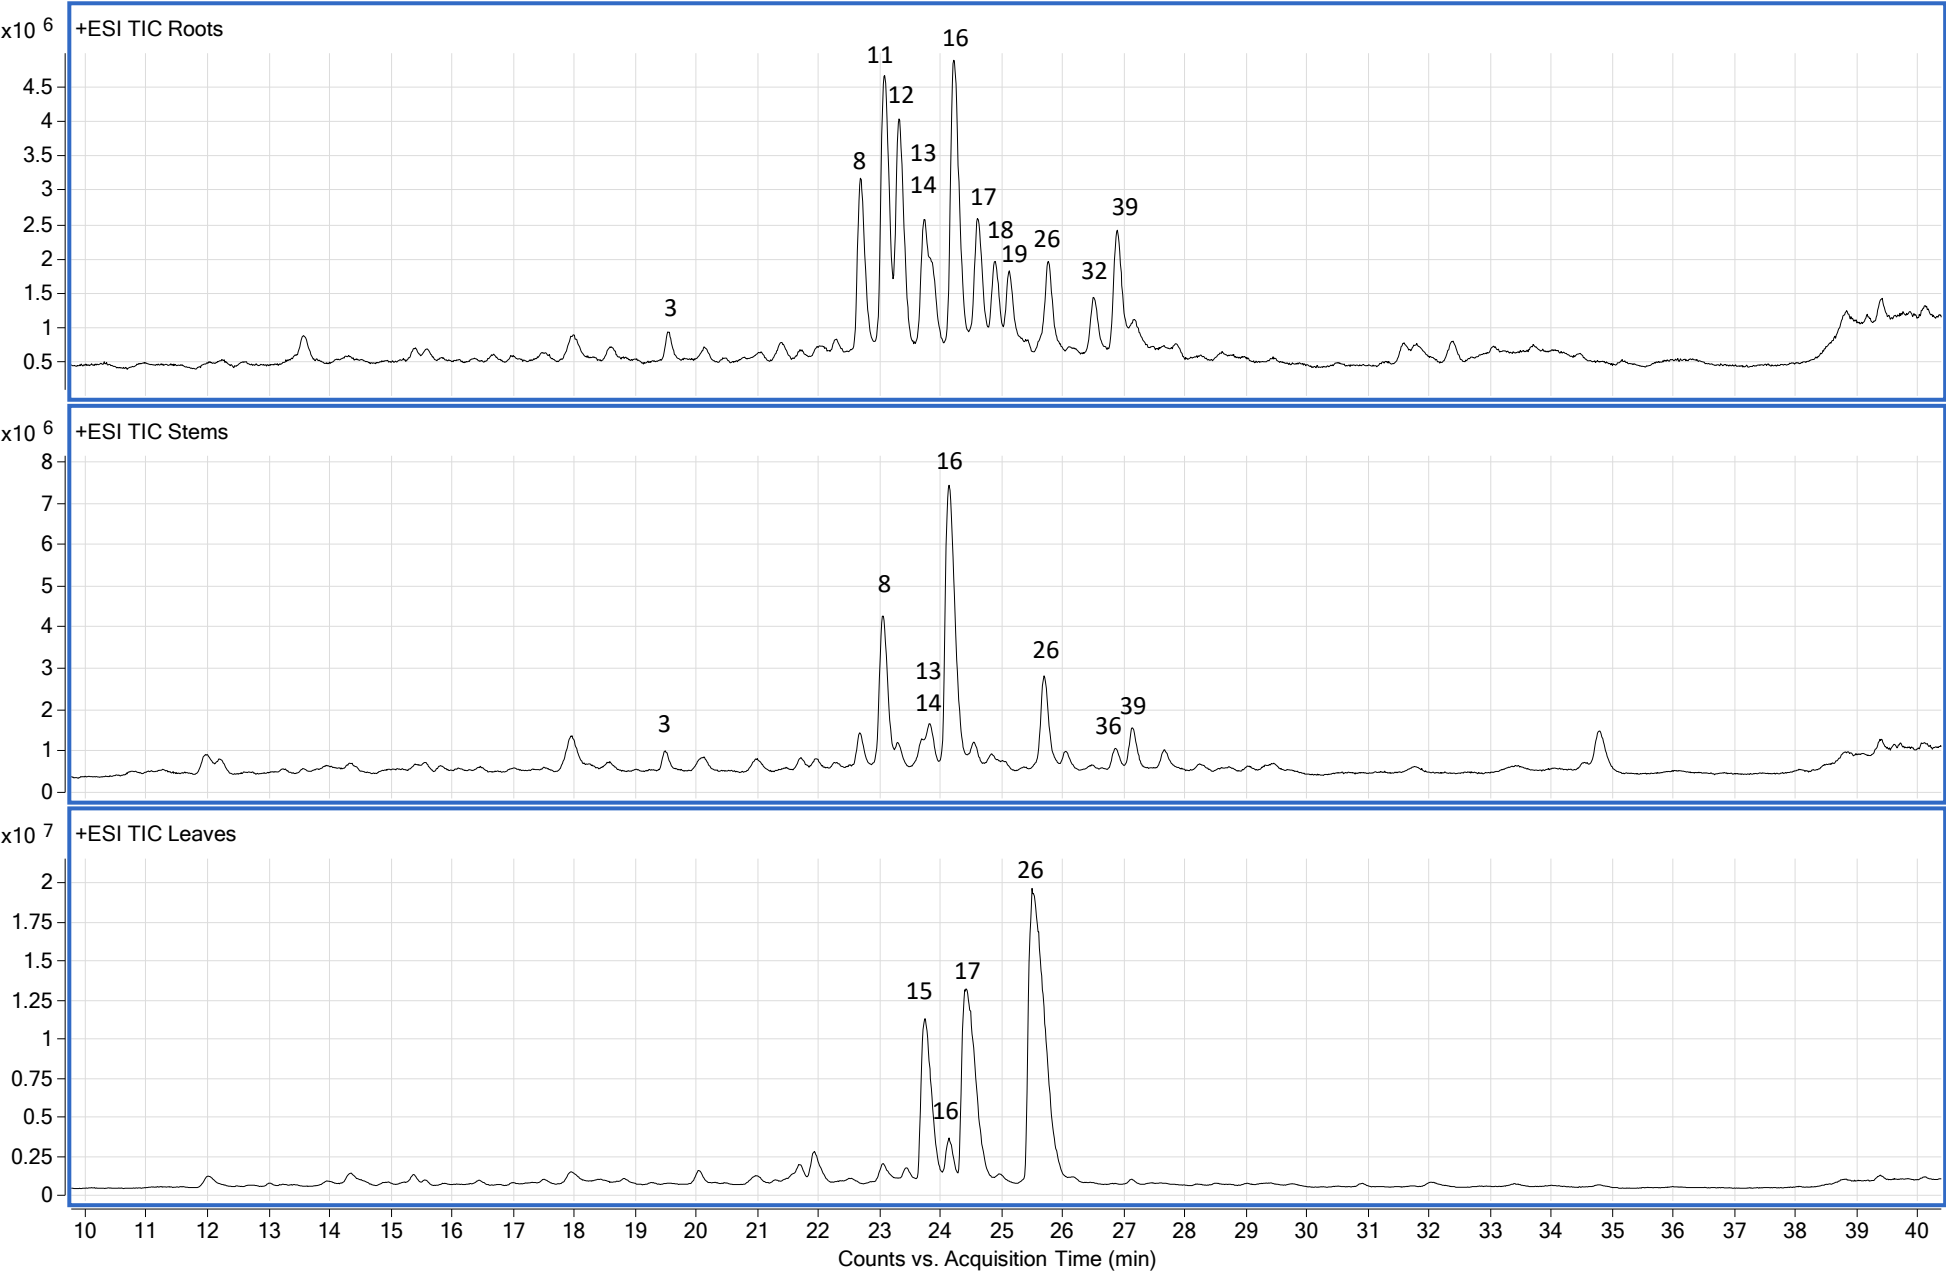

*Solanum caripense*

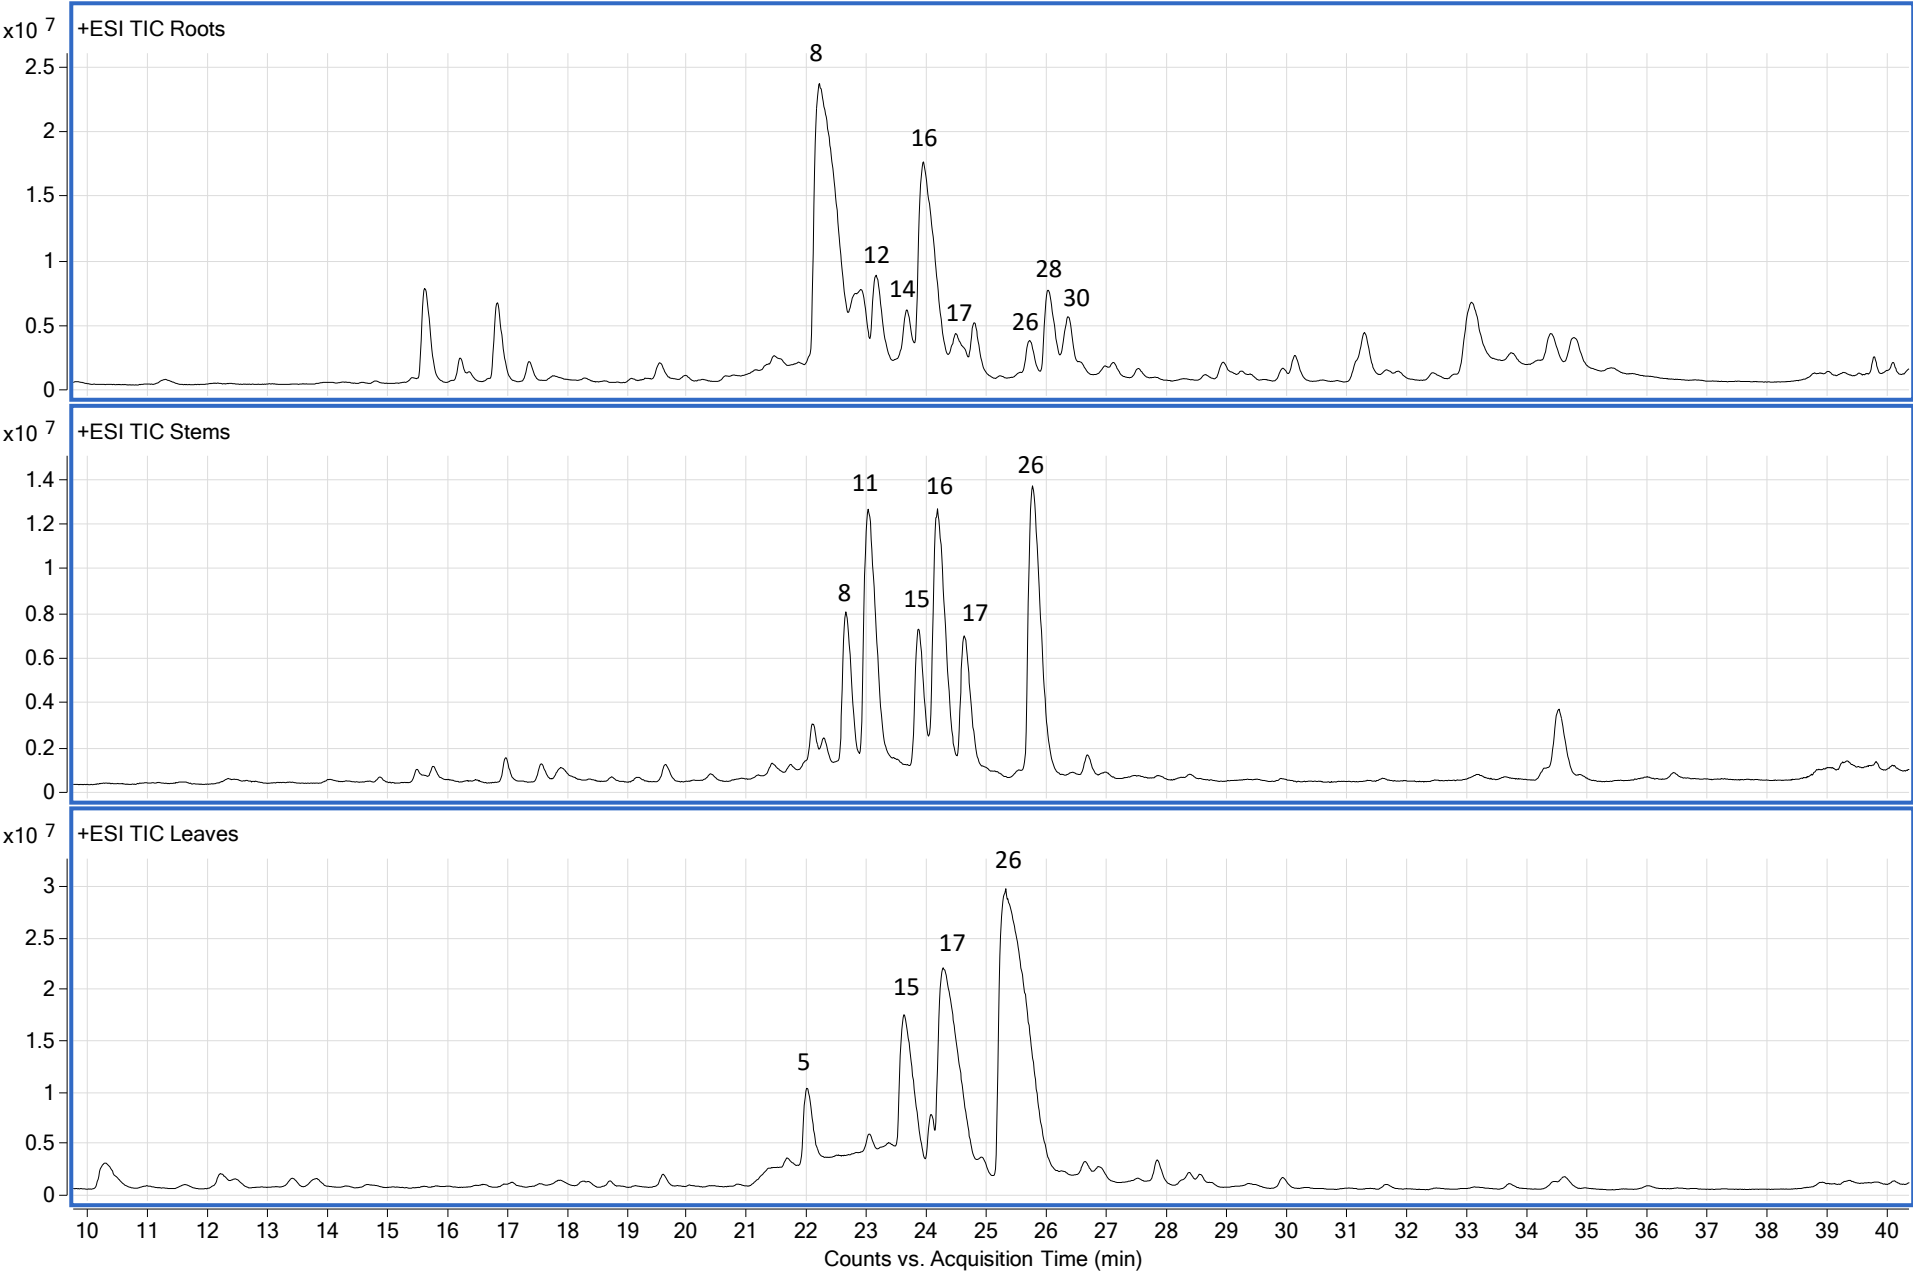

*Solanum nigrum* (Blackberries)

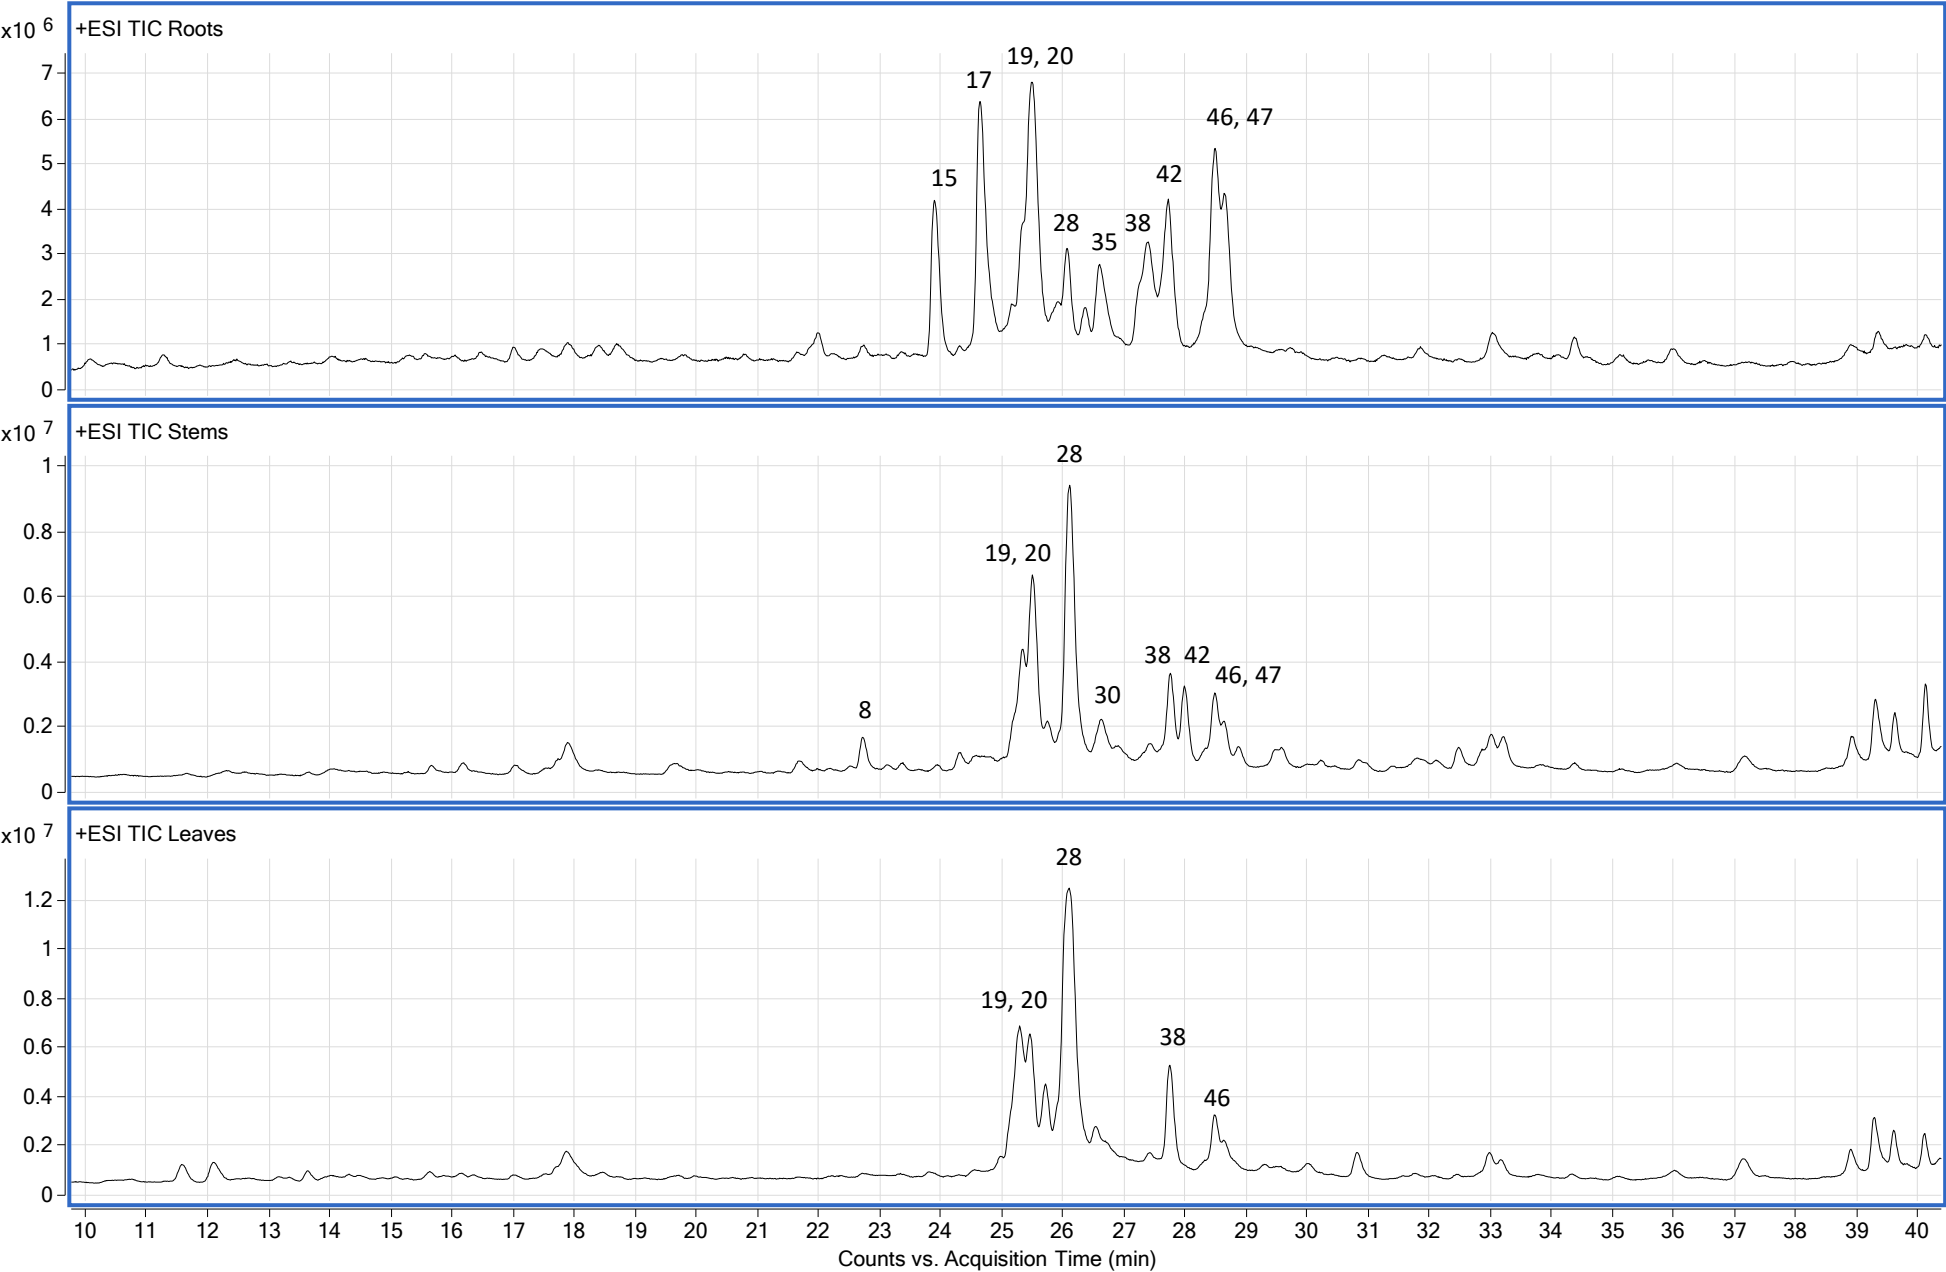

*Solanum melanocerasum*

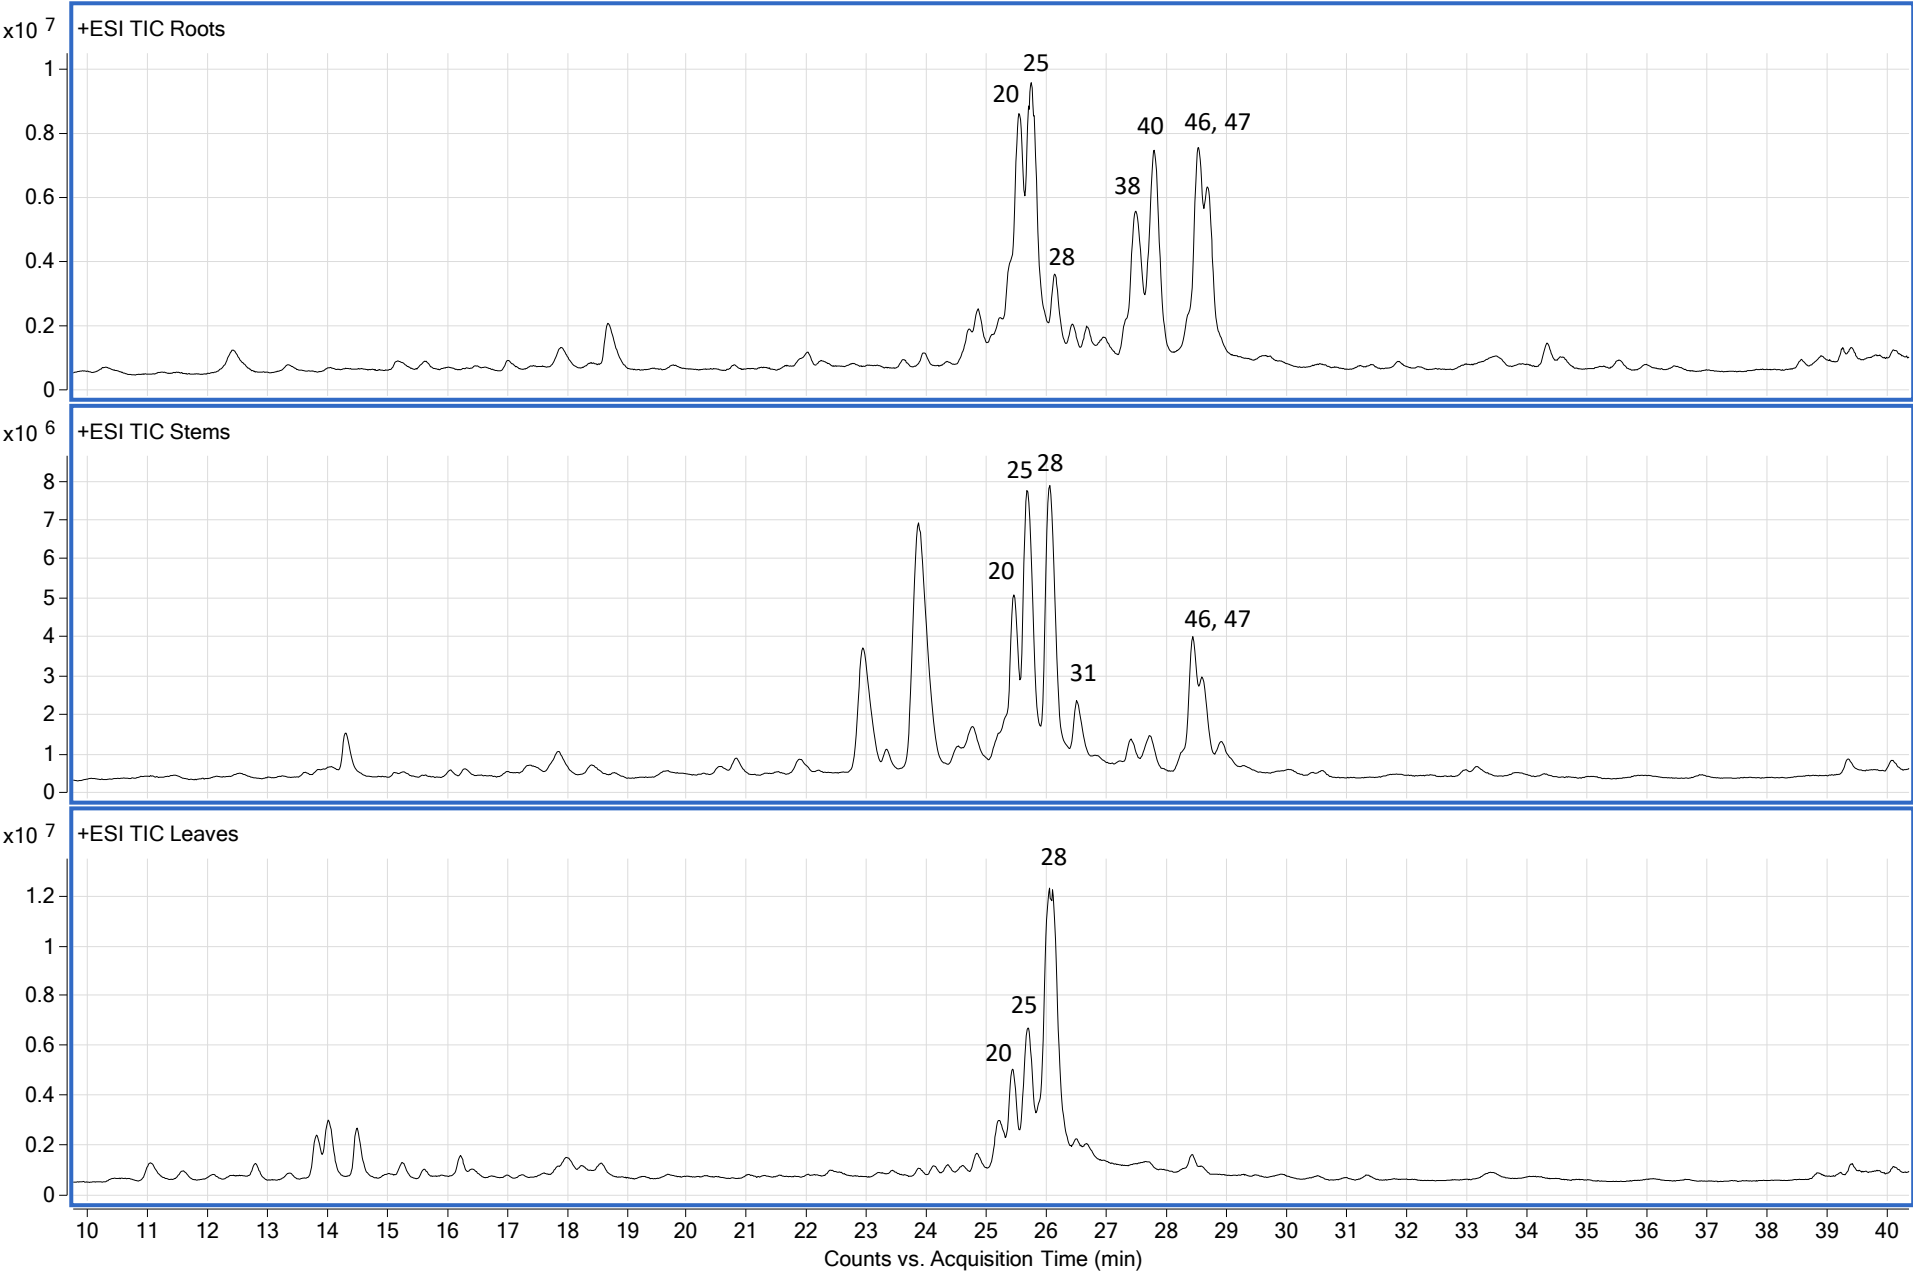

*Solanum quitoense*

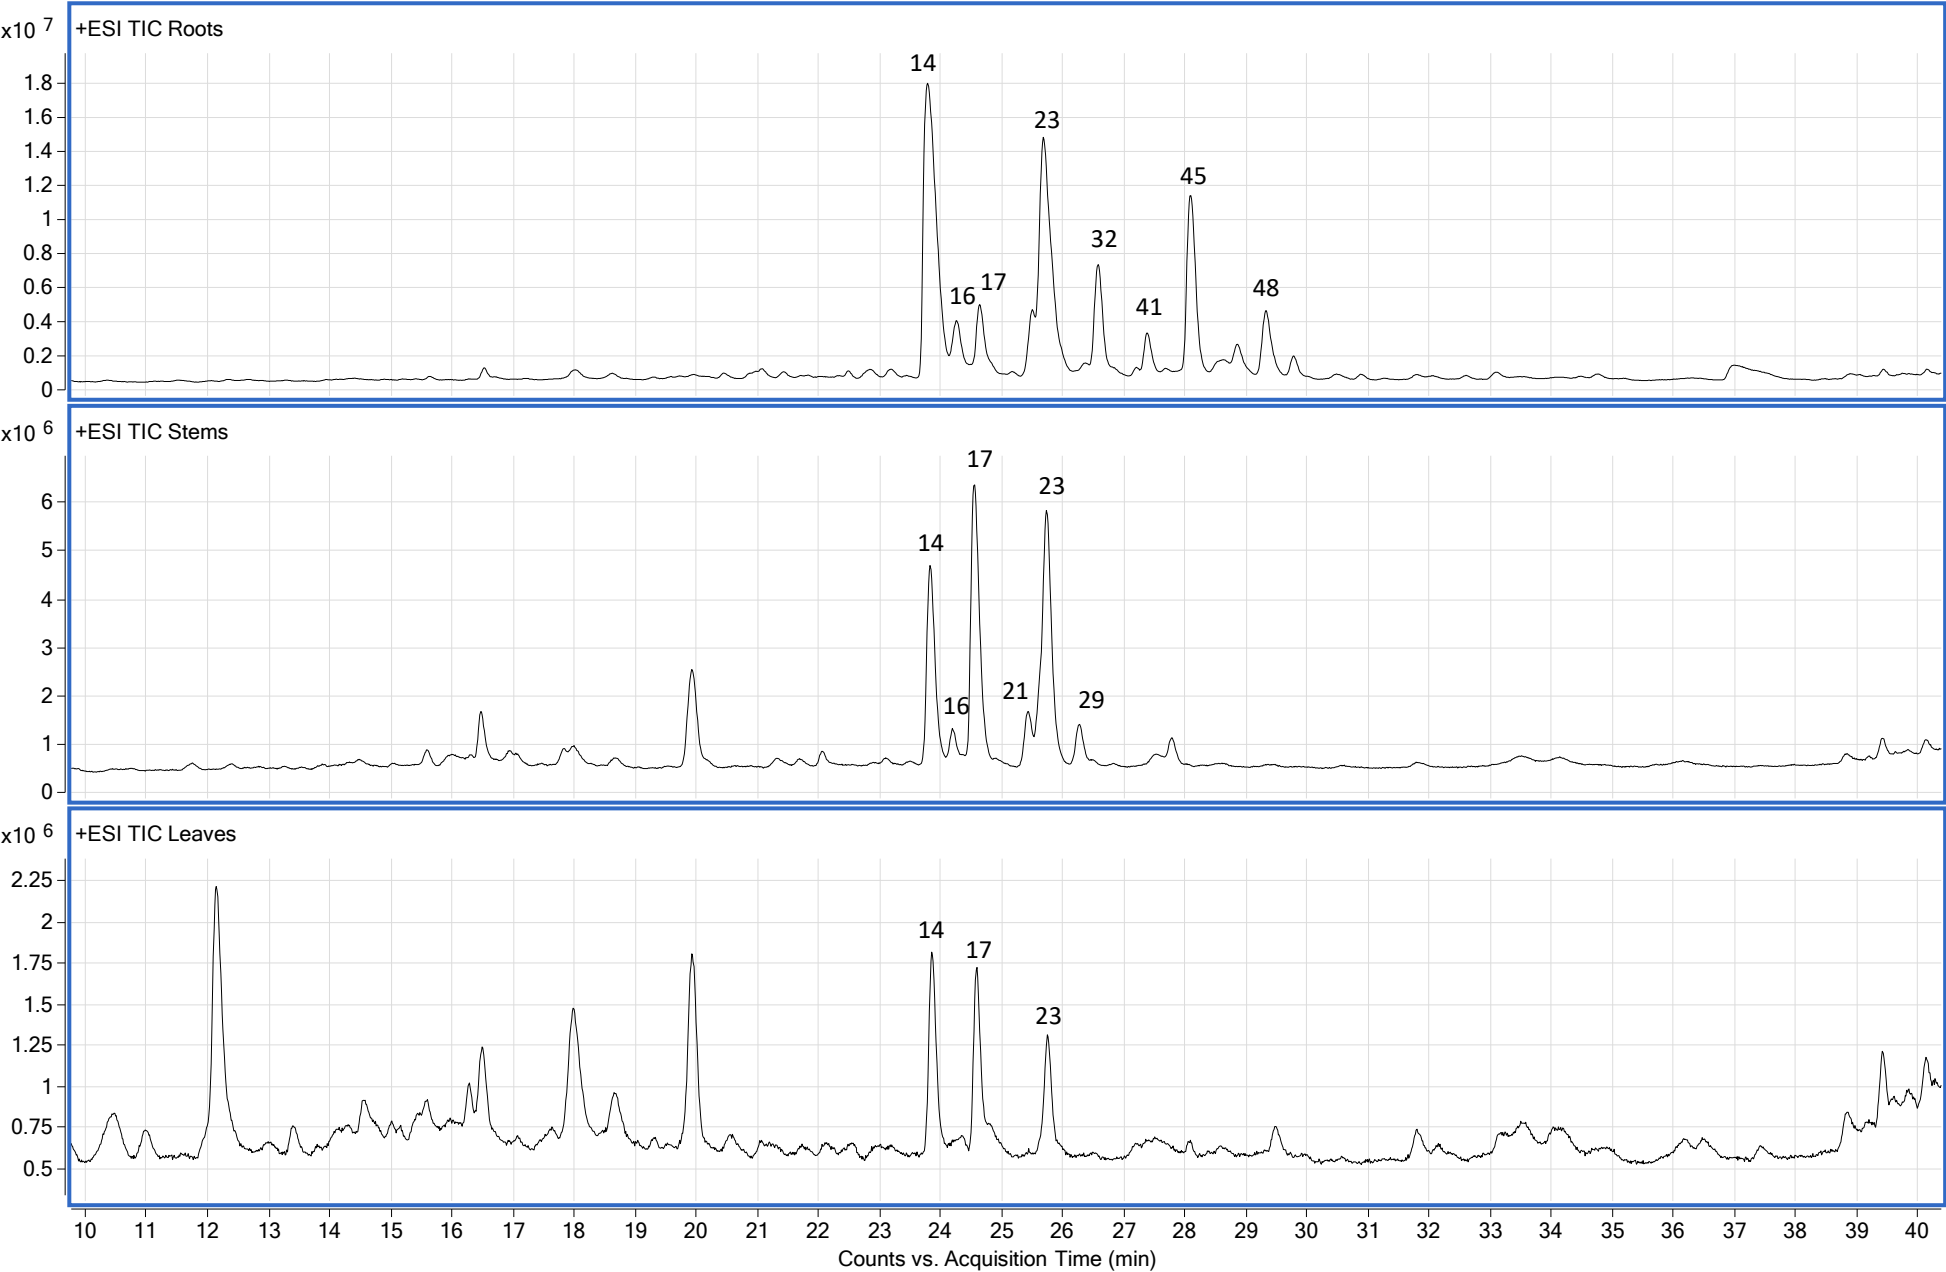

*Solanum sysimbrifolium*

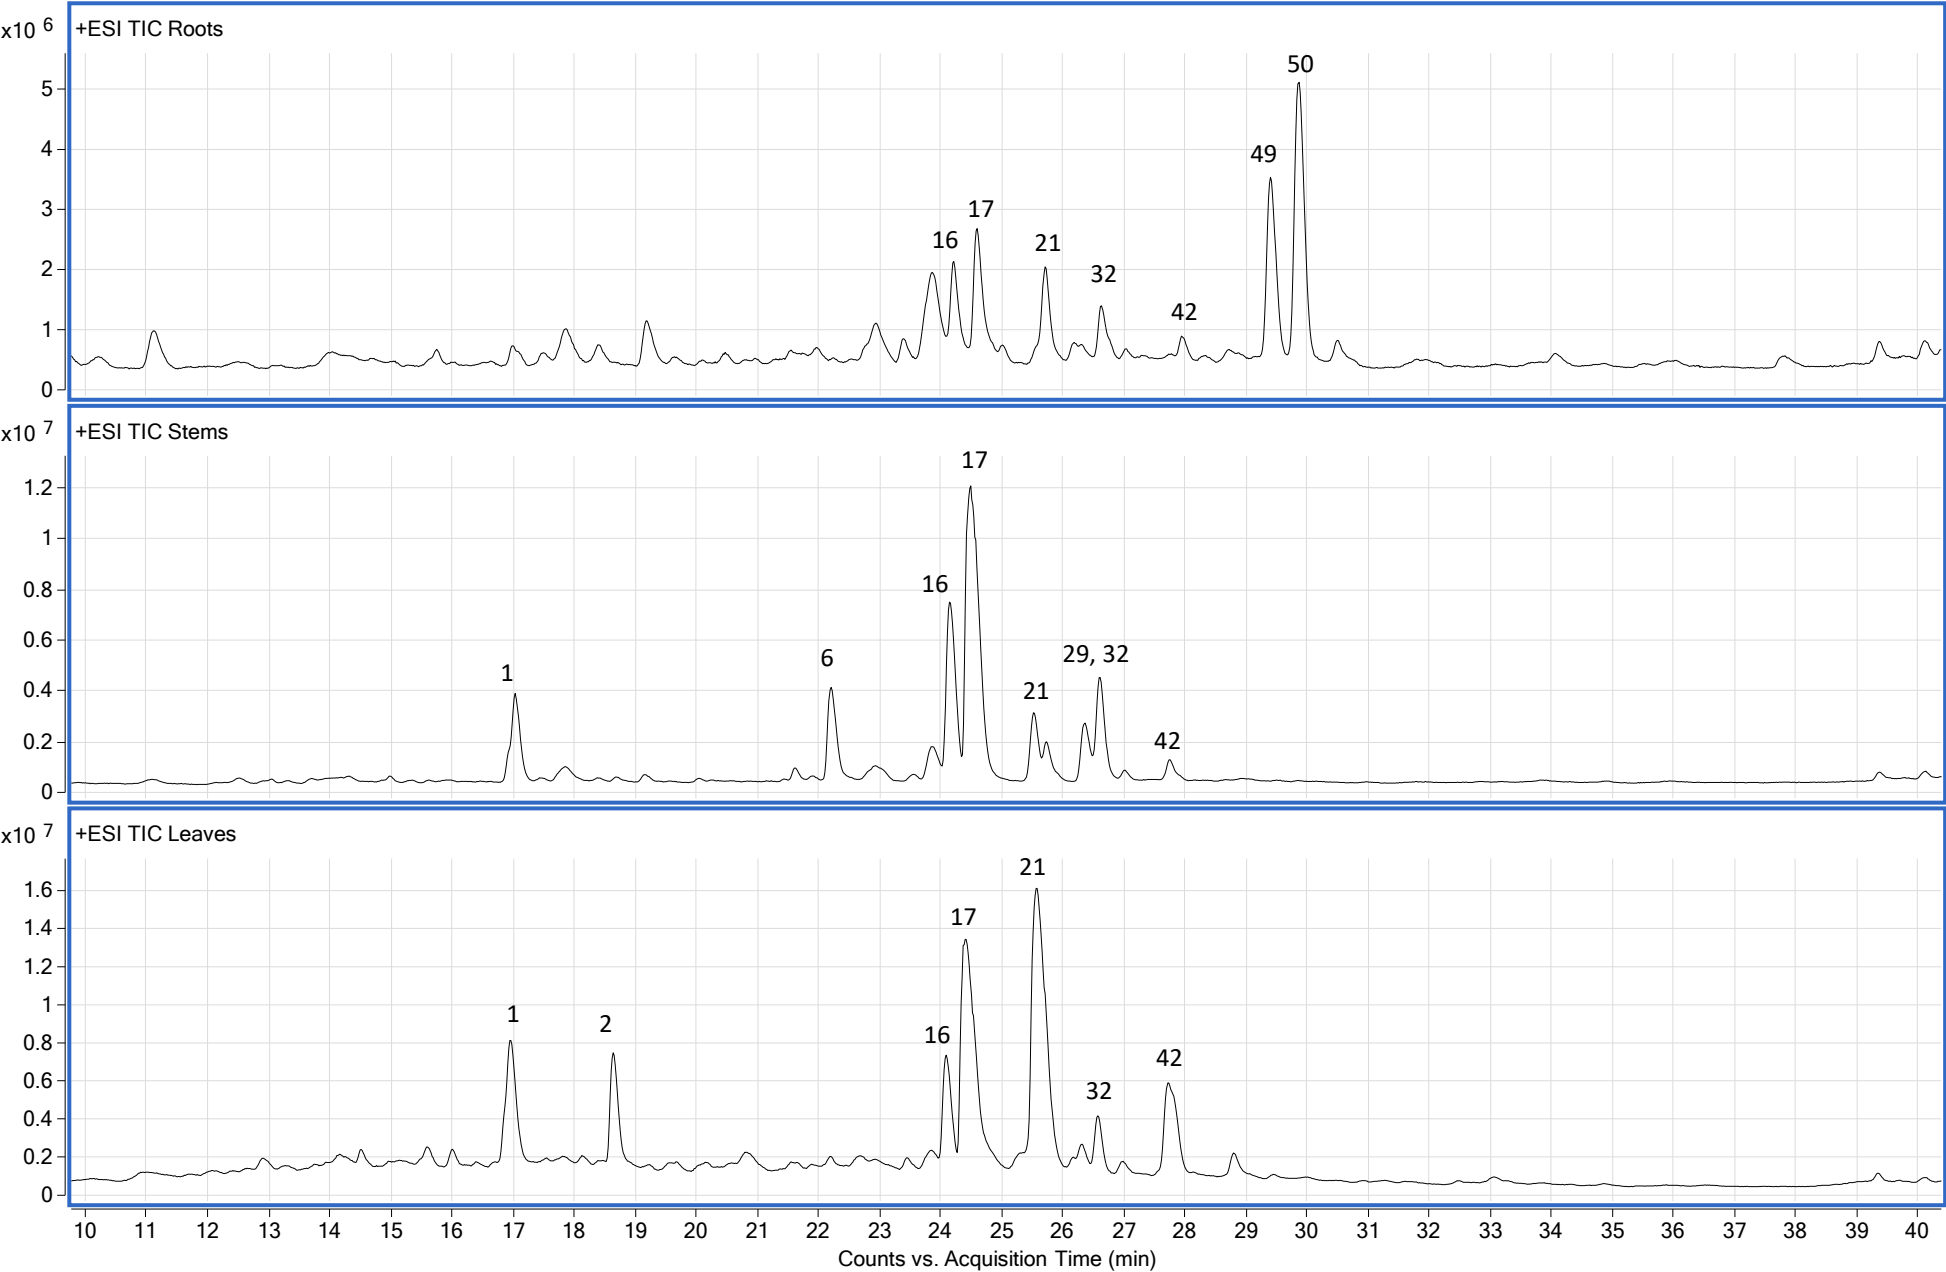

*Solanum retroflexum*

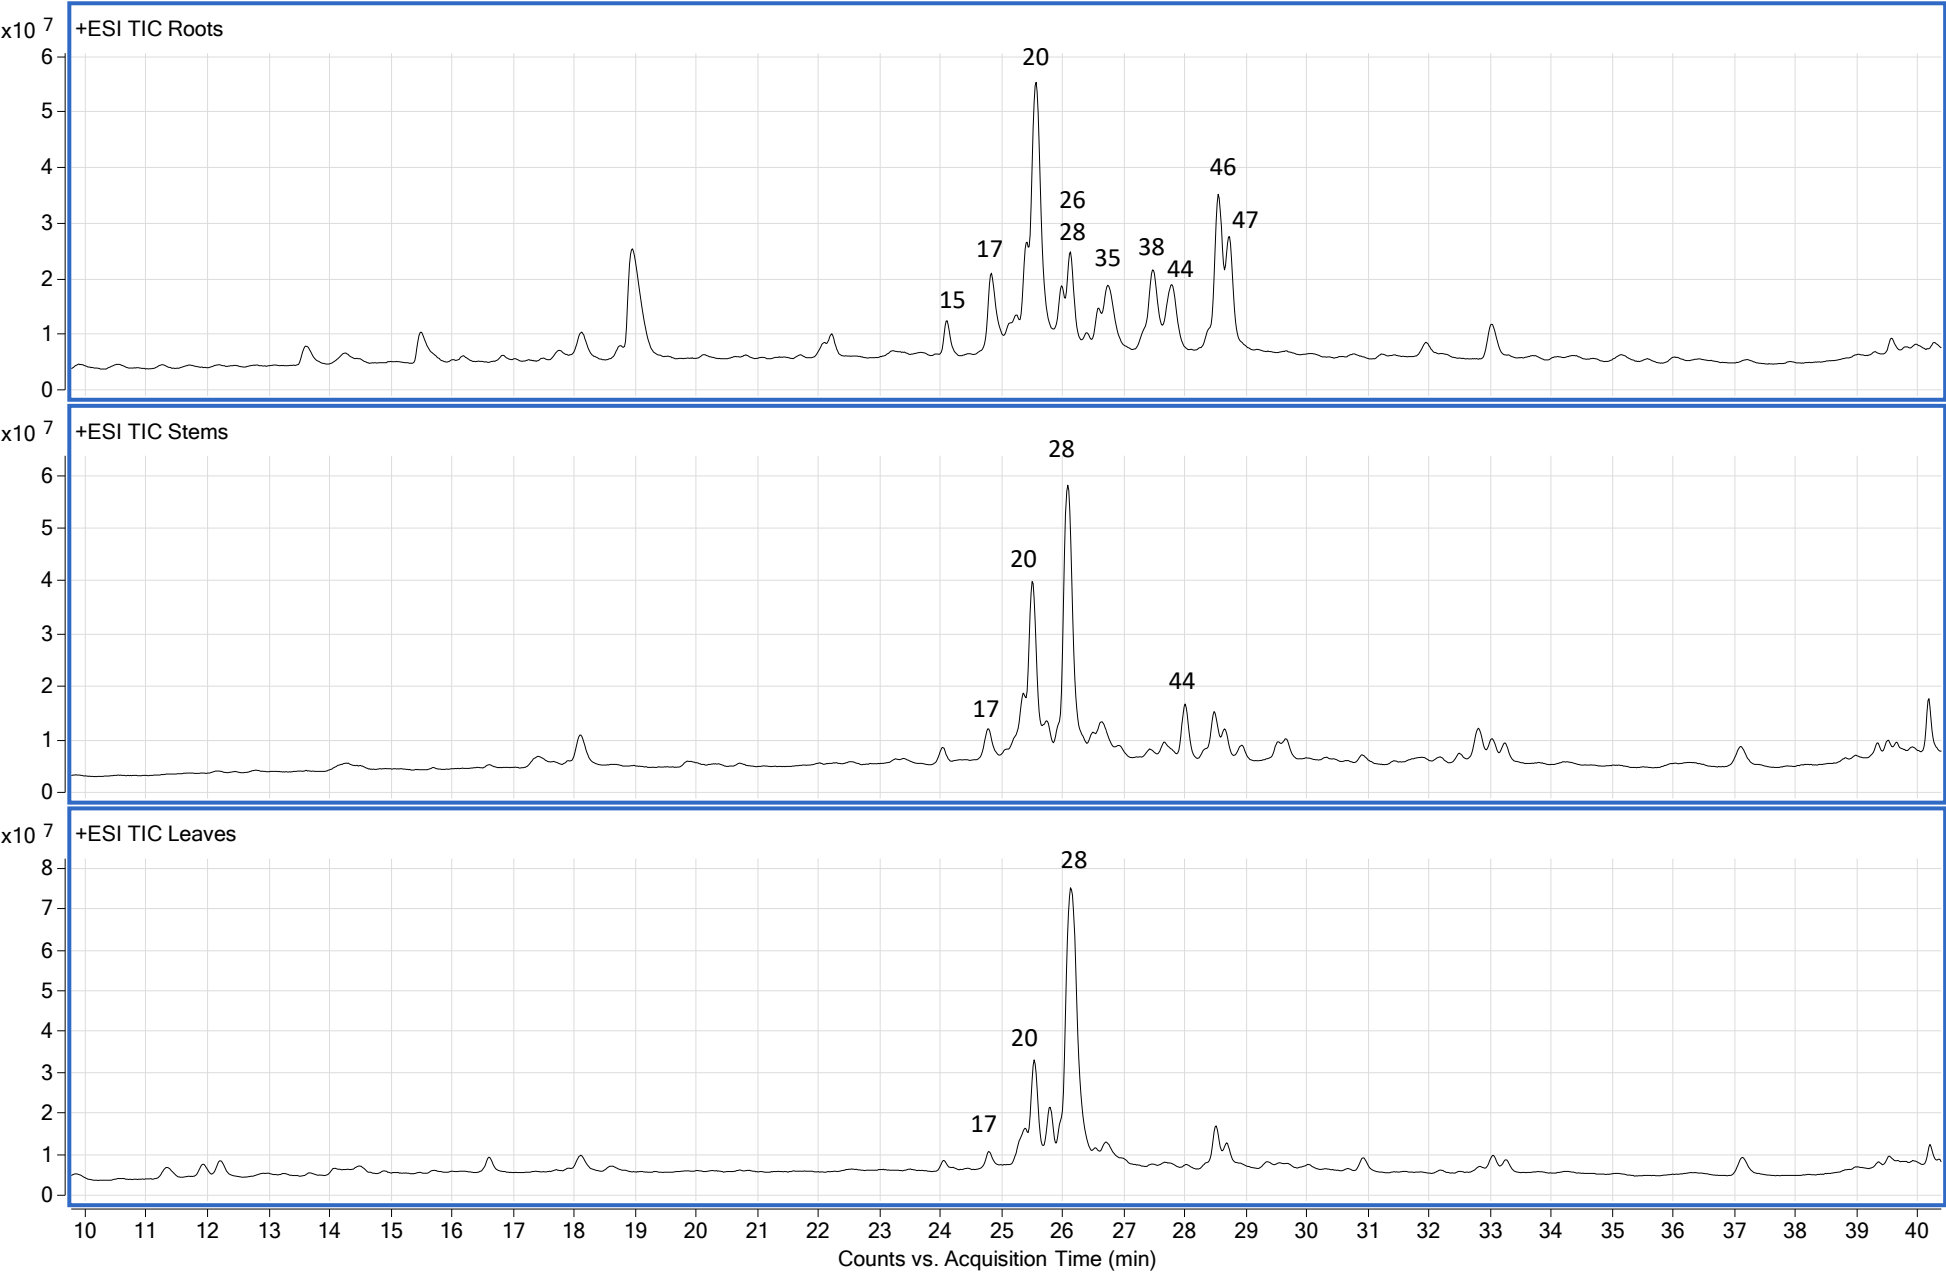



*Solanum nigrum* (Orange Berry)

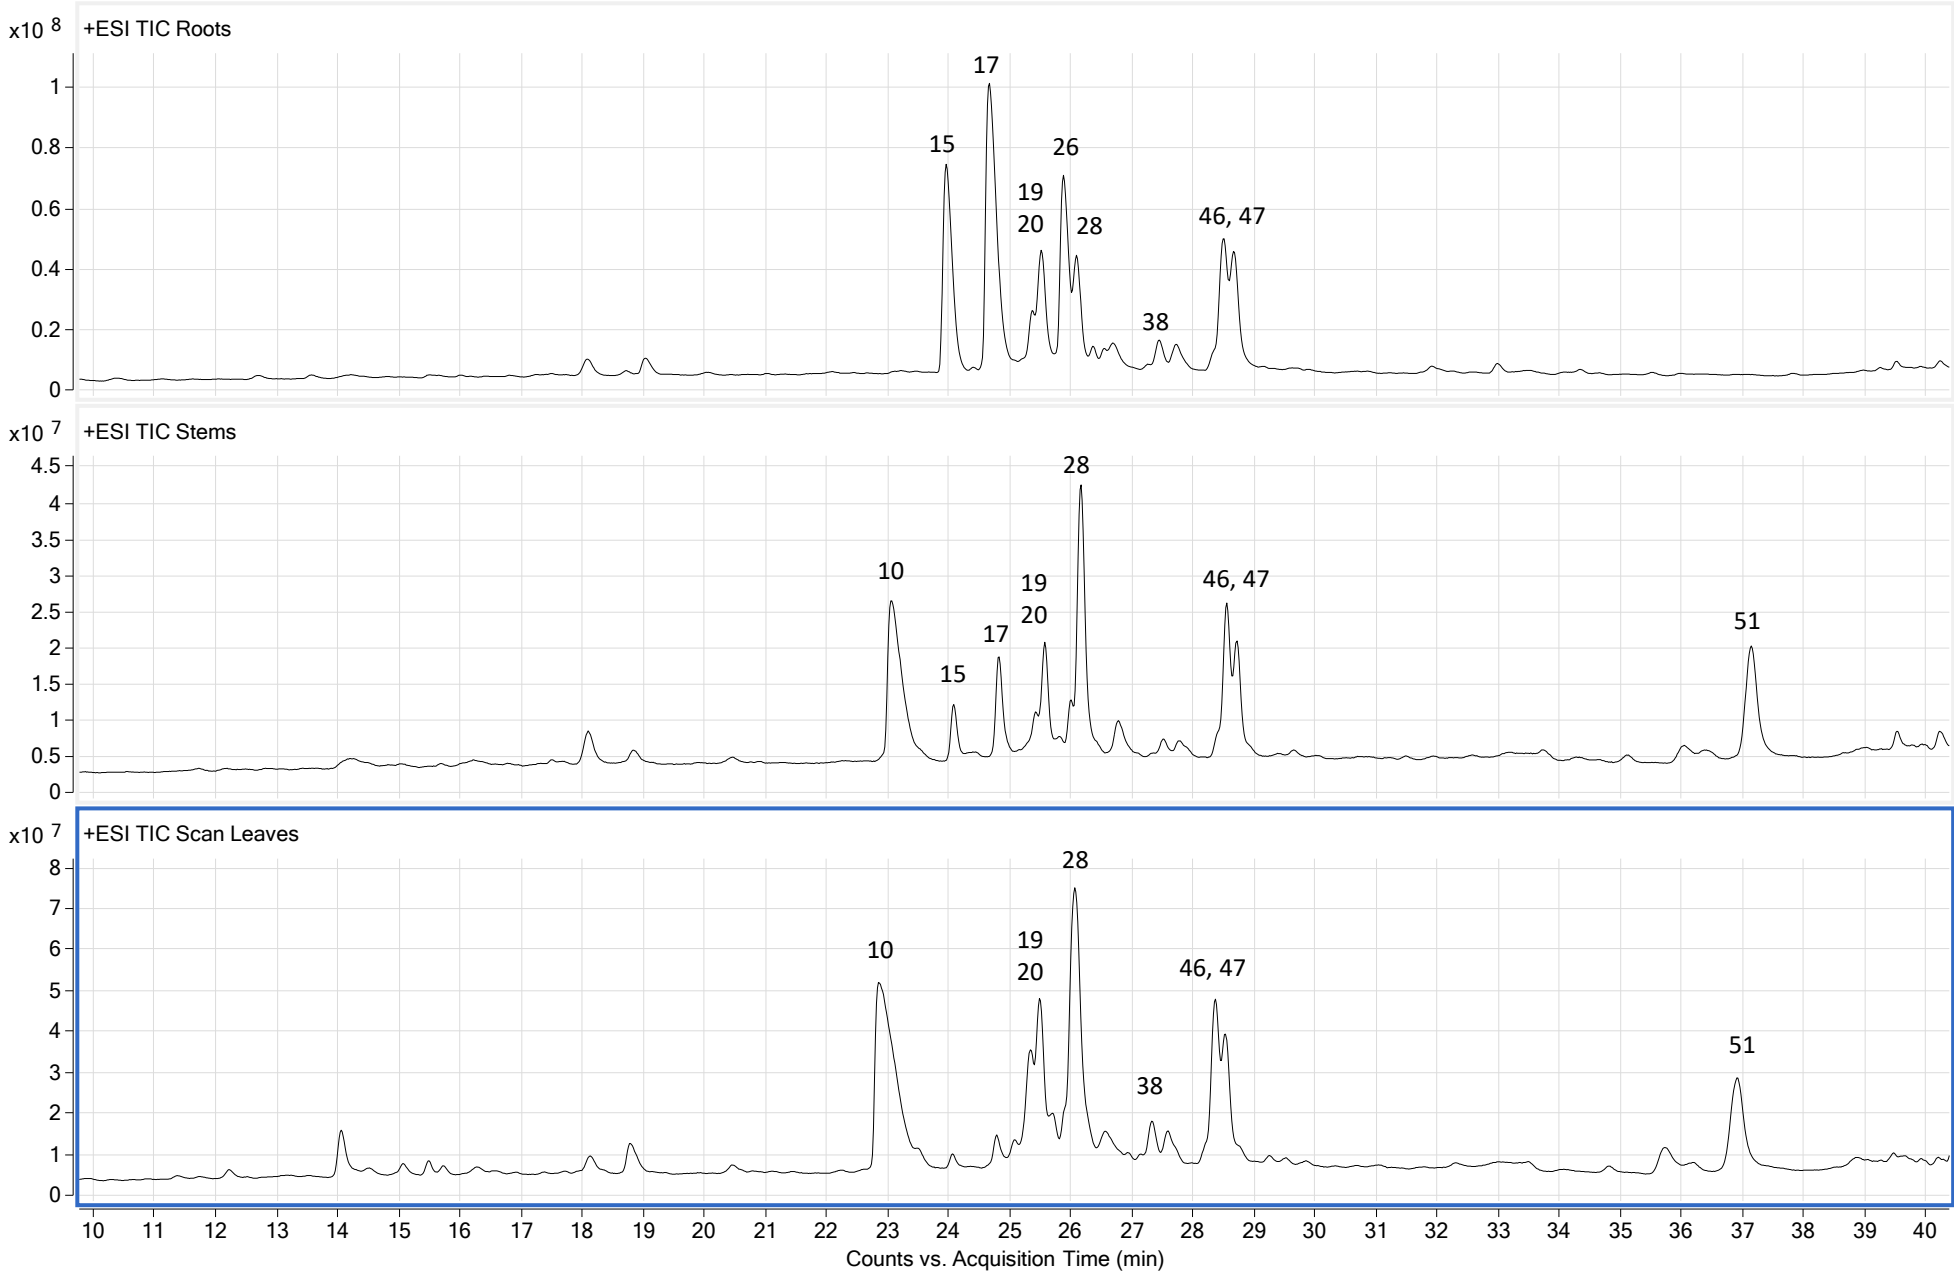

Supplement: s1 [file s1]
